# Supplementary material for: High Concentrations of Atmospheric Ammonia Induce Alterations in the Hepatic Proteome of Broilers (Gallus gallus): An iTRAQ-Based Quantitative Proteomic Analysis
Source: PLoS One. 2015 Apr 22;10(4):e0123596. doi: 10.1371/journal.pone.0123596 (PMC4406733; doi:10.1371/journal.pone.0123596)
Supplement: S3 Table — (XLS) [file pone.0123596.s003.xls]

## Sheet: Sheet1
Table S3 List of all proteins (n=2452) identified in the study
Accession	Description	Score	Coverage	# Proteins	# Unique Peptides	# Peptides	# PSMs	# AAs	MW [kDa]	calc. pI	Log2 Ratio	P-value
F1NDC2	Uncharacterized protein OS=Gallus gallus GN=RPS23 PE=3 SV=2 - [F1NDC2_CHICK]	99.38	0.3007	1	4	4	9	143	15.8	10.49	-0.0433921	0.870651
P09244	Tubulin beta-7 chain OS=Gallus gallus PE=2 SV=1 - [TBB7_CHICK]	989.22	0.6284	2	4	20	185	444	49.6	4.89	-0.145751	0.484142
P68139	Actin, alpha skeletal muscle OS=Gallus gallus GN=ACTA1 PE=1 SV=1 - [ACTS_CHICK]	794.94	0.557	5	1	19	479	377	42	5.39	0.0235479	0.81228
Q6VN51	Protein phospatase 3 regulatory subunit B alpha isoform type 1 OS=Gallus gallus GN=PPP3R1 PE=2 SV=1 - [Q6VN51_CHICK]	21.64	0.1059	1	1	1	1	170	19.3	4.81	-0.188711	0.00727179
Q5ZMT0	14-3-3 protein epsilon OS=Gallus gallus GN=YWHAE PE=1 SV=1 - [1433E_CHICK]	586.52	0.6157	5	12	14	89	255	29.2	4.74	-0.00216848	0.985288
F1NTT2	Uncharacterized protein OS=Gallus gallus GN=RPS28 PE=3 SV=2 - [F1NTT2_CHICK]	72.57	0.3043	1	2	2	12	69	7.8	10.7	0.0950856	0.625564
Q6ITC7	40S ribosomal protein S13 OS=Gallus gallus GN=RPS13 PE=2 SV=3 - [RS13_CHICK]	227.31	0.5166	1	8	8	37	151	17.2	10.54	-0.13268	0.680554
Q5ZHX1	Ras-related protein Rap-1b OS=Gallus gallus GN=RAP1B PE=2 SV=1 - [RAP1B_CHICK]	224.49	0.3424	1	1	5	33	184	20.8	5.78	-0.143444	0.0135088
F1NN08	Uncharacterized protein OS=Gallus gallus GN=ARF1 PE=2 SV=2 - [F1NN08_CHICK]	312.22	0.4696	3	5	8	57	181	20.7	6.8	-0.0826251	0.32929
P61355	60S ribosomal protein L27 OS=Gallus gallus GN=RPL27 PE=2 SV=2 - [RL27_CHICK]	52.9	0.2721	1	3	3	5	136	15.8	10.56	-0.259156	0.70629
P62801	Histone H4 OS=Gallus gallus GN=H4-I PE=1 SV=2 - [H4_CHICK]	365.04	0.5922	3	8	8	100	103	11.4	11.36	-0.233864	0.5545
P63247	Guanine nucleotide-binding protein subunit beta-2-like 1 OS=Gallus gallus GN=GNB2L1 PE=2 SV=1 - [GBLP_CHICK]	677.89	0.7224	1	20	20	78	317	35.1	7.69	0.0186558	0.892131
Q5ZHW8	Uncharacterized protein OS=Gallus gallus GN=RPS14 PE=2 SV=1 - [Q5ZHW8_CHICK]	202.29	0.2914	1	4	4	28	151	16.3	10.05	0.0888559	0.317391
E1BTM1	Uncharacterized protein OS=Gallus gallus GN=ETF1 PE=4 SV=1 - [E1BTM1_CHICK]	136.47	0.1259	1	4	4	9	437	49	5.71	-0.0101101	0.89293
Q5ZKF5	S-phase kinase-associated protein 1 OS=Gallus gallus GN=SKP1 PE=2 SV=1 - [SKP1_CHICK]	176.34	0.2761	1	4	4	13	163	18.6	4.54	-0.0741557	0.0291926
E1BY89	Uncharacterized protein OS=Gallus gallus GN=RPL23 PE=3 SV=2 - [E1BY89_CHICK]	224.91	0.3857	1	5	5	27	140	14.9	10.51	-0.0508055	0.665487
Q5ZKU5	Ras-related protein Rab-14 OS=Gallus gallus GN=RAB14 PE=2 SV=3 - [RAB14_CHICK]	200.21	0.3256	9	4	5	22	215	23.9	6.21	-0.0331002	0.670607
E1C8Y9	Uncharacterized protein OS=Gallus gallus GN=SRSF3 PE=4 SV=1 - [E1C8Y9_CHICK]	126.49	0.2317	2	3	4	8	164	19.3	11.65	0.134165	0.280727
Q5ZJT7	Uncharacterized protein OS=Gallus gallus GN=TCEB1 PE=4 SV=1 - [Q5ZJT7_CHICK]	54.23	0.2589	1	2	2	3	112	12.5	4.78	0.0732372	0.24513
P62303	Small nuclear ribonucleoprotein E OS=Gallus gallus GN=SNRPE PE=3 SV=1 - [RUXE_CHICK]	112.43	0.5217	1	3	3	7	92	10.8	9.44	-0.0512449	0.625381
P84247	Histone H3.3 OS=Gallus gallus GN=H3-IX PE=1 SV=2 - [H33_CHICK]	113.57	0.4044	2	1	4	40	136	15.3	11.27	-0.237316	0.439543
R4GF71	Uncharacterized protein OS=Gallus gallus GN=TMSB4X PE=4 SV=1 - [R4GF71_CHICK]	53.68	0.2955	3	2	3	4	44	5	5.06	0.00581589	0.971402
Q5ZL58	Uncharacterized protein OS=Gallus gallus GN=SNRPD3 PE=2 SV=1 - [Q5ZL58_CHICK]	132.6	0.3095	1	3	3	8	126	13.9	10.32	0.051934	0.401638
P84229	Histone H3.2 OS=Gallus gallus GN=H3-I PE=1 SV=2 - [H32_CHICK]	125.06	0.4044	1	1	4	49	136	15.4	11.27	-0.331299	0.342695
P63283	SUMO-conjugating enzyme UBC9 OS=Gallus gallus GN=UBE2I PE=2 SV=1 - [UBC9_CHICK]	87.51	0.1519	1	4	4	7	158	18	8.66	0.0395181	0.70084
P02272	Histone H2A.V OS=Gallus gallus GN=H2AFV PE=1 SV=2 - [H2AV_CHICK]	274.66	0.5391	5	4	6	36	128	13.5	10.58	-0.228893	0.52511
Q71UZ3	Casein kinase 1 alpha isoform OS=Gallus gallus PE=2 SV=1 - [Q71UZ3_CHICK]	25.01	0.0308	3	1	1	1	325	37.5	9.48	-0.133598	0.427988
F2Z4L4	Uncharacterized protein OS=Gallus gallus GN=SET PE=3 SV=1 - [F2Z4L4_CHICK]	216.55	0.3249	2	6	6	17	277	32.1	4.22	-0.0547752	0.376574
Q5F428	Eukaryotic translation initiation factor 3 subunit L OS=Gallus gallus GN=EIF3L PE=2 SV=1 - [EIF3L_CHICK]	182.96	0.1028	1	5	5	11	564	66.6	6.34	0.138366	0.024954
P98157	Low-density lipoprotein receptor-related protein 1 OS=Gallus gallus GN=LRP1 PE=2 SV=1 - [LRP1_CHICK]	473.95	0.0471	3	17	17	21	4543	506.8	5.25	-0.0475166	0.305314
P02552	Tubulin alpha-1 chain (Fragment) OS=Gallus gallus PE=1 SV=1 - [TBA1_CHICK]	980.04	0.568	3	2	19	173	412	45.9	5.08	-0.35846	0.119093
P53478	Actin, cytoplasmic type 5 OS=Gallus gallus PE=3 SV=1 - [ACT5_CHICK]	1185.24	0.6543	10	9	23	987	376	41.8	5.48	-0.0491671	0.368891
F2Z4M0	Histone-binding protein RBBP4 OS=Gallus gallus GN=RBBP4 PE=4 SV=1 - [F2Z4M0_CHICK]	119.06	0.1341	3	4	4	7	425	47.6	4.89	0.0320637	0.753213
P67869	Casein kinase II subunit beta OS=Gallus gallus GN=CSNK2B PE=2 SV=1 - [CSK2B_CHICK]	27.11	0.0512	1	1	1	2	215	24.9	5.55	-0.157015	0.27603
E1BW94	Uncharacterized protein OS=Gallus gallus GN=SF3B14 PE=4 SV=1 - [E1BW94_CHICK]	42.09	0.208	1	2	2	2	125	14.6	9.38	0.015946	0.844484
Q5ZIA5	Coatomer subunit beta OS=Gallus gallus GN=COPB1 PE=2 SV=1 - [COPB_CHICK]	785.75	0.3242	1	23	23	48	953	107.1	6	-0.0417783	0.53809
O93532	Keratin, type II cytoskeletal cochleal OS=Gallus gallus PE=2 SV=1 - [K2CO_CHICK]	474.99	0.2724	11	9	14	54	492	53.8	6.1	-0.503667	0.046266
P0CB50	Peroxiredoxin-1 OS=Gallus gallus GN=PRDX1 PE=1 SV=1 - [PRDX1_CHICK]	368.41	0.5427	1	12	12	124	199	22.3	8.1	0.147107	0.209532
P62764	Visinin-like protein 1 OS=Gallus gallus GN=VSNL1 PE=2 SV=2 - [VISL1_CHICK]	22.96	0.0576	1	1	1	5	191	22.1	5.15	-0.151728	0.203827
H9L213	Uncharacterized protein OS=Gallus gallus GN=RPL17 PE=3 SV=1 - [H9L213_CHICK]	320.04	0.4076	4	7	8	37	184	21.4	10.18	-0.367782	0.465373
F1NFT6	Uncharacterized protein (Fragment) OS=Gallus gallus GN=UBE2N PE=2 SV=1 - [F1NFT6_CHICK]	231.46	0.5704	2	7	7	46	142	16	5.3	0.0651224	0.517185
P19121	Serum albumin OS=Gallus gallus GN=ALB PE=1 SV=2 - [ALBU_CHICK]	1908.27	0.7772	1	2	43	1110	615	69.9	5.74	0.00778468	0.958705
P07341	Fructose-bisphosphate aldolase B OS=Gallus gallus GN=ALDOB PE=3 SV=3 - [ALDOB_CHICK]	1116.96	0.7885	2	23	26	1444	364	39.3	8.59	0.176209	0.119765
P08106	Heat shock 70 kDa protein OS=Gallus gallus PE=1 SV=1 - [HSP70_CHICK]	847.07	0.3249	7	7	18	97	634	69.7	5.68	-0.144082	0.0709536
Q5ZL72	60 kDa heat shock protein, mitochondrial OS=Gallus gallus GN=HSPD1 PE=1 SV=1 - [CH60_CHICK]	1842.35	0.6981	2	36	36	595	573	60.9	5.87	0.0623107	0.496605
P02263	Histone H2A-IV OS=Gallus gallus PE=1 SV=2 - [H2A4_CHICK]	317.45	0.5814	6	2	6	81	129	13.9	10.9	-0.465998	0.268213
P0C1H3	Histone H2B 1/2/3/4/6 OS=Gallus gallus GN=H2B-I PE=1 SV=2 - [H2B1_CHICK]	279.74	0.4683	5	1	7	147	126	13.9	10.27	-0.0489376	0.864907
P0C1H5	Histone H2B 7 OS=Gallus gallus GN=H2B-VII PE=1 SV=2 - [H2B7_CHICK]	228.54	0.4683	4	1	7	128	126	14	10.32	-0.0260585	0.964947
P42558	GTP-binding nuclear protein Ran OS=Gallus gallus GN=RAN PE=2 SV=1 - [RAN_CHICK]	252.45	0.3009	1	6	6	21	216	24.4	7.88	0.0279068	0.50478
P09653	Tubulin beta-5 chain OS=Gallus gallus PE=3 SV=1 - [TBB5_CHICK]	456.02	0.2937	1	1	11	78	446	49.9	4.88	#NUM!	#NUM!
P09207	Tubulin beta-6 chain OS=Gallus gallus PE=1 SV=1 - [TBB6_CHICK]	436.15	0.3139	1	5	12	38	446	50.1	5.06	-0.198478	0.213093
Q6EE31	T-complex protein 1 subunit theta OS=Gallus gallus GN=CCT8 PE=1 SV=3 - [TCPQ_CHICK]	650.92	0.4307	1	1	20	40	548	59.4	5.53	0.0239898	0.25692
Q5ZI72	Heterogeneous nuclear ribonucleoprotein D-like OS=Gallus gallus GN=HNRNPDL PE=2 SV=1 - [HNRDL_CHICK]	170.25	0.2159	1	3	5	13	301	33.4	7.31	-0.00617918	0.927029
P50890	40S ribosomal protein SA OS=Gallus gallus GN=RPSA PE=3 SV=1 - [RSSA_CHICK]	540.72	0.5676	2	12	12	54	296	33	4.87	0.0418204	0.456522
Q90593	78 kDa glucose-regulated protein OS=Gallus gallus GN=HSPA5 PE=1 SV=1 - [GRP78_CHICK]	1737.76	0.5583	1	34	36	374	652	72	5.22	-0.00797257	0.944417
Q5ZHQ1	Small ubiquitin-related modifier 3 OS=Gallus gallus GN=SUMO3 PE=3 SV=1 - [SUMO3_CHICK]	65.39	0.1277	2	1	1	4	94	10.7	5.5	0.0271326	0.837935
Q9DEA3	Proliferating cell nuclear antigen OS=Gallus gallus GN=PCNA PE=1 SV=1 - [PCNA_CHICK]	74.88	0.2405	1	4	4	4	262	28.9	4.72	-0.0684259	0.546209
P11501	Heat shock protein HSP 90-alpha OS=Gallus gallus GN=HSP90AA1 PE=3 SV=3 - [HS90A_CHICK]	1613.44	0.5179	7	40	42	221	728	84	5.08	-0.111017	0.0105902
Q805F9	DNA damage-binding protein 1 OS=Gallus gallus GN=DDB1 PE=2 SV=1 - [DDB1_CHICK]	175.78	0.0851	2	7	7	10	1140	126.9	5.26	-0.089175	0.0980665
P07322	Beta-enolase OS=Gallus gallus GN=ENO3 PE=1 SV=3 - [ENOB_CHICK]	259.55	0.1521	1	1	5	363	434	47.2	7.61	-0.027247	0.611414
P48463	Serine/threonine-protein phosphatase 2A catalytic subunit alpha isoform OS=Gallus gallus GN=PPP2CA PE=2 SV=1 - [PP2AA_CHICK]	64.64	0.1068	2	3	3	3	309	35.5	5.43	0.0596804	0.622982
Q5ZM66	Uncharacterized protein OS=Gallus gallus GN=RCJMB04_2p17 PE=4 SV=1 - [Q5ZM66_CHICK]	78.8	0.1304	2	1	1	8	115	13	11	-0.0589043	0.840374
P00368	Glutamate dehydrogenase 1, mitochondrial OS=Gallus gallus GN=GLUD1 PE=1 SV=1 - [DHE3_CHICK]	1163.55	0.5865	1	10	27	409	503	55.7	8.28	-0.0260322	0.806536
Q5ZL43	1,2-dihydroxy-3-keto-5-methylthiopentene dioxygenase OS=Gallus gallus GN=ADI1 PE=2 SV=1 - [MTND_CHICK]	154.43	0.3278	1	5	5	11	180	21.7	5.27	0.138165	0.0842564
P79761	Cytochrome P450 1A5 OS=Gallus gallus GN=CYP1A5 PE=2 SV=1 - [CP1A5_CHICK]	171.08	0.1004	4	4	4	7	528	60	7.72	0.176107	0.168359
P08629	Thioredoxin OS=Gallus gallus GN=TXN PE=3 SV=2 - [THIO_CHICK]	371.58	0.8667	1	9	9	225	105	11.7	5.25	0.0544042	0.288212
Q90734	Alpha-actinin-4 OS=Gallus gallus GN=ACTN4 PE=1 SV=1 - [ACTN4_CHICK]	1558.22	0.5166	6	9	37	174	904	104.1	5.26	-0.0510229	0.327137
O42184	CAP-Gly domain-containing linker protein 1 OS=Gallus gallus GN=CLIP1 PE=2 SV=1 - [CLIP1_CHICK]	228.97	0.0565	3	8	8	8	1433	160.9	5.34	0.199723	0.268075
P02612	Myosin regulatory light chain 2, smooth muscle major isoform OS=Gallus gallus PE=1 SV=2 - [MLRM_CHICK]	196.8	0.4535	1	3	6	19	172	19.8	4.92	0.0336334	0.776106
F1N8D9	Uncharacterized protein (Fragment) OS=Gallus gallus GN=RAC1 PE=2 SV=1 - [F1N8D9_CHICK]	189.72	0.3167	4	4	6	22	180	20.2	8.59	-0.0288917	0.599778
P13127	F-actin-capping protein subunit alpha-1 OS=Gallus gallus GN=CAPZA1 PE=1 SV=1 - [CAZA1_CHICK]	253.83	0.3287	2	5	7	15	286	32.9	5.69	-0.0221972	0.818787
P28497	F-actin-capping protein subunit alpha-2 OS=Gallus gallus GN=CAPZA2 PE=1 SV=1 - [CAZA2_CHICK]	271.11	0.472	1	6	8	17	286	32.8	5.82	-0.0593604	0.232423
P02001	Hemoglobin subunit alpha-D OS=Gallus gallus GN=HBAD PE=1 SV=1 - [HBAD_CHICK]	721.64	0.9574	2	14	15	349	141	15.7	7.59	0.167533	0.276041
P01994	Hemoglobin subunit alpha-A OS=Gallus gallus GN=HBAA PE=1 SV=2 - [HBA_CHICK]	550.82	0.7183	2	10	11	647	142	15.4	8.44	-0.158048	0.522174
P02701	Avidin OS=Gallus gallus GN=AVD PE=1 SV=3 - [AVID_CHICK]	23.66	0.0526	1	1	1	1	152	16.8	9.66	#NUM!	#NUM!
Q5ZLN1	Phosphoglycerate mutase 1 OS=Gallus gallus GN=PGAM1 PE=1 SV=3 - [PGAM1_CHICK]	643.08	0.7677	2	14	14	222	254	28.9	7.49	0.107596	0.0932037
Q5ZLQ6	14-3-3 protein beta/alpha OS=Gallus gallus GN=YWHAB PE=2 SV=1 - [1433B_CHICK]	457.87	0.5	5	8	11	64	244	27.9	4.83	0.063598	0.215257
Q5F3W6	14-3-3 protein gamma OS=Gallus gallus GN=YWHAG PE=1 SV=1 - [1433G_CHICK]	350.34	0.3198	4	1	8	57	247	28.2	4.93	0.184667	0.0350731
Q5ZMD1	14-3-3 protein theta OS=Gallus gallus GN=YWHAQ PE=1 SV=1 - [1433T_CHICK]	476.27	0.5592	5	11	13	64	245	27.8	4.78	0.0523742	0.397106
Q5ZKC9	14-3-3 protein zeta OS=Gallus gallus GN=YWHAZ PE=2 SV=1 - [1433Z_CHICK]	512.98	0.5918	5	11	13	69	245	27.8	4.79	0.0343234	0.641496
Q5ZKF6	7-methylguanosine phosphate-specific 5'-nucleotidase OS=Gallus gallus GN=NT5C3B PE=2 SV=1 - [5NT3B_CHICK]	57.15	0.0796	1	2	2	2	289	33.1	5.55	-0.160338	0.20892
Q5ZLG0	Acetoacetyl-CoA synthetase OS=Gallus gallus GN=AACS PE=2 SV=1 - [AACS_CHICK]	24.13	0.009	1	1	1	1	667	74.3	6.49	0.226757	0.580861
P00504	Aspartate aminotransferase, cytoplasmic OS=Gallus gallus GN=GOT1 PE=1 SV=3 - [AATC_CHICK]	633.47	0.5801	2	17	17	100	412	45.9	8.12	0.124295	0.0771235
Q5ZKR7	Long-chain-fatty-acid--CoA ligase ACSBG2 OS=Gallus gallus GN=ACSBG2 PE=2 SV=2 - [ACBG2_CHICK]	556.06	0.2896	1	1	18	42	763	84.2	7.11	0.127429	0.586905
Q5ZHT1	Acyl-CoA dehydrogenase family member 11 OS=Gallus gallus GN=ACAD11 PE=2 SV=1 - [ACD11_CHICK]	479.64	0.2394	1	1	14	32	777	86.9	8.15	0.00888299	0.939635
P07031	Acylphosphatase-2 OS=Gallus gallus GN=ACYP2 PE=1 SV=2 - [ACYP2_CHICK]	53.56	0.2524	1	3	3	3	103	11.4	9.5	0.125536	0.241056
P23991	Alcohol dehydrogenase 1 OS=Gallus gallus GN=ADH1 PE=1 SV=2 - [ADH1_CHICK]	1162.63	0.7739	1	22	23	671	376	39.8	8.37	0.207645	0.0692522
P13216	Adrenodoxin, mitochondrial (Fragment) OS=Gallus gallus GN=FDX1 PE=1 SV=1 - [ADX_CHICK]	121.22	0.2168	2	2	2	9	143	15.5	4.88	-0.0395872	0.656345
Q5ZMN0	Acidic leucine-rich nuclear phosphoprotein 32 family member B OS=Gallus gallus GN=ANP32B PE=2 SV=1 - [AN32B_CHICK]	25.03	0.042	2	1	1	1	262	29.9	3.98	#NUM!	#NUM!
P17785	Annexin A2 OS=Gallus gallus GN=ANXA2 PE=1 SV=2 - [ANXA2_CHICK]	415.76	0.4307	1	13	13	30	339	38.6	7.33	-0.363698	0.053631
Q5ZMP6	AP-2 complex subunit mu OS=Gallus gallus GN=AP2M1 PE=2 SV=1 - [AP2M1_CHICK]	216.5	0.1894	1	7	7	12	433	49.4	9.54	-0.0883034	0.429968
Q5ZIF1	Adipocyte plasma membrane-associated protein OS=Gallus gallus GN=APMAP PE=2 SV=1 - [APMAP_CHICK]	248.68	0.2699	1	8	8	13	415	46.1	6.21	-0.121499	0.10745
P08250	Apolipoprotein A-I OS=Gallus gallus GN=APOA1 PE=1 SV=2 - [APOA1_CHICK]	819.28	0.6705	1	22	22	182	264	30.7	5.69	0.0528616	0.896099
Q5ZK55	Apolipoprotein O-like OS=Gallus gallus GN=APOOL PE=2 SV=1 - [APOOL_CHICK]	111.63	0.1103	2	2	2	5	272	30.1	9.55	0.0277967	0.744092
P26990	ADP-ribosylation factor 6 OS=Gallus gallus GN=ARF6 PE=2 SV=3 - [ARF6_CHICK]	195.89	0.3543	3	5	6	15	175	20.1	8.95	0.0873679	0.226834
Q90WD0	Actin-related protein 3 OS=Gallus gallus GN=ACTR3 PE=2 SV=1 - [ARP3_CHICK]	548.11	0.5622	2	16	16	54	418	47.4	5.88	-0.0887484	0.173364
P13914	Arylamine N-acetyltransferase, pineal gland isozyme NAT-3 OS=Gallus gallus PE=2 SV=1 - [ARY2_CHICK]	87.72	0.1241	1	3	3	4	290	33.6	6.39	-0.00715237	0.912805
P12275	Arylamine N-acetyltransferase, liver isozyme OS=Gallus gallus PE=1 SV=1 - [ARYL_CHICK]	81.38	0.1847	2	3	3	6	287	32.9	5.85	0.00657354	0.900913
P33879	Sodium/potassium-transporting ATPase subunit beta-3 OS=Gallus gallus GN=ATP1B3 PE=2 SV=1 - [AT1B3_CHICK]	47.94	0.05	1	1	1	1	280	31.8	7.94	0.133083	0.296719
Q03669	Sarcoplasmic/endoplasmic reticulum calcium ATPase 2 OS=Gallus gallus GN=ATP2A2 PE=2 SV=2 - [AT2A2_CHICK]	253.51	0.1037	4	7	7	11	1041	114.6	5.34	-0.0784417	0.480948
P21611	Beta-2-microglobulin OS=Gallus gallus GN=B2M PE=1 SV=3 - [B2MG_CHICK]	232.04	0.563	5	4	4	14	119	13	6.28	-0.227483	0.198392
P15575	Band 3 anion transport protein OS=Gallus gallus GN=SLC4A1 PE=2 SV=1 - [B3AT_CHICK]	210.46	0.0597	4	5	5	12	922	102.2	6.74	-0.276447	0.254494
P17790	Basigin OS=Gallus gallus GN=BSG PE=1 SV=2 - [BASI_CHICK]	283.19	0.2165	1	7	7	30	388	42.4	6.02	0.0794913	0.230336
P23614	Brain acid soluble protein 1 homolog OS=Gallus gallus GN=BASP1 PE=2 SV=4 - [BASP1_CHICK]	346.95	0.6352	1	12	12	33	244	25.4	4.68	-0.218881	0.482566
Q9I993	Beta,beta-carotene 15,15'-monooxygenase OS=Gallus gallus GN=BCMO1 PE=1 SV=1 - [BCDO1_CHICK]	91.38	0.0741	1	3	3	3	526	60.3	6.46	0.0272668	0.796764
Q8JGM8	BH3-interacting domain death agonist OS=Gallus gallus GN=BID PE=2 SV=2 - [BID_CHICK]	117.69	0.1865	1	3	3	4	193	21.7	4.87	0.00328564	0.981405
P87362	Bleomycin hydrolase OS=Gallus gallus GN=BLMH PE=1 SV=1 - [BLMH_CHICK]	306.54	0.2198	1	6	6	18	455	52.7	5.9	0.0365321	0.551115
Q5ZLT7	Basic leucine zipper and W2 domain-containing protein 1 OS=Gallus gallus GN=BZW1 PE=2 SV=1 - [BZW1_CHICK]	137.86	0.1364	1	4	4	5	418	48	5.92	0.125518	0.149063
P07630	Carbonic anhydrase 2 OS=Gallus gallus GN=CA2 PE=2 SV=3 - [CAH2_CHICK]	514.07	0.6577	1	14	14	98	260	29	7.05	0.0122915	0.933884
P14315	F-actin-capping protein subunit beta isoforms 1 and 2 OS=Gallus gallus GN=CAPZB PE=1 SV=3 - [CAPZB_CHICK]	357.53	0.5126	1	11	11	36	277	31.3	5.59	-0.0204529	0.679973
P43233	Cathepsin B OS=Gallus gallus GN=CTSB PE=2 SV=1 - [CATB_CHICK]	449	0.2853	3	9	9	78	340	37.6	6.14	0.172796	0.287952
Q05744	Cathepsin D OS=Gallus gallus GN=CTSD PE=1 SV=1 - [CATD_CHICK]	603.79	0.4171	1	14	14	151	398	43.3	6.32	0.387807	0.0555217
P09648	Cathepsin L1 (Fragments) OS=Gallus gallus GN=CTSL PE=1 SV=1 - [CATL1_CHICK]	155.42	0.2385	2	5	5	11	218	23.9	5.19	0.107161	0.13192
Q5F477	UPF0554 protein C2orf43 homolog OS=Gallus gallus GN=RCJMB04_2g19 PE=2 SV=2 - [CB043_CHICK]	40.49	0.0864	2	2	2	3	324	36.9	7.33	0.0597452	0.641903
Q5ZKV9	Coiled-coil domain-containing protein 132 OS=Gallus gallus GN=CCDC132 PE=2 SV=1 - [CC132_CHICK]	25.62	0.0084	2	1	1	1	949	109.5	5.77	-0.100022	0.635593
Q90694	Cell division control protein 42 homolog OS=Gallus gallus GN=CDC42 PE=2 SV=1 - [CDC42_CHICK]	245.24	0.4136	1	5	5	40	191	21.3	6.55	0.0643163	0.502991
Q5ZKD1	Choline/ethanolaminephosphotransferase 1 OS=Gallus gallus GN=CEPT1 PE=2 SV=2 - [CEPT1_CHICK]	38.8	0.0264	2	1	1	3	416	46.1	8	-0.0464676	0.784739
P81475	Complement factor B-like protease (Fragment) OS=Gallus gallus PE=1 SV=1 - [CFBL_CHICK]	87.22	0.1	1	1	1	2	250	27	6.84	-0.0778982	0.731125
P23007	Citrate synthase, mitochondrial OS=Gallus gallus GN=CS PE=1 SV=1 - [CISY_CHICK]	60.07	0.0855	1	1	4	6	433	47.3	8.22	-0.277989	0.0516674
P02457	Collagen alpha-1(I) chain OS=Gallus gallus GN=COL1A1 PE=1 SV=3 - [CO1A1_CHICK]	256.1	0.0537	1	6	6	20	1453	137.7	5.62	-0.0475678	0.851513
P02467	Collagen alpha-2(I) chain (Fragments) OS=Gallus gallus GN=COL1A2 PE=1 SV=2 - [CO1A2_CHICK]	186.83	0.0382	2	4	4	13	1362	129.6	8.94	-0.201265	0.550537
O42163	Cochlin OS=Gallus gallus GN=COCH PE=2 SV=1 - [COCH_CHICK]	204.96	0.1554	2	6	6	11	547	59.4	8.32	-0.13588	0.140185
P21566	Cofilin-2 OS=Gallus gallus GN=CFL2 PE=1 SV=2 - [COF2_CHICK]	258.1	0.5301	1	6	7	24	166	18.6	7.88	0.110145	0.175223
Q5ZIK9	Coatomer subunit epsilon OS=Gallus gallus GN=COPE PE=2 SV=1 - [COPE_CHICK]	167.02	0.1981	1	6	6	18	308	34.3	5.14	0.0826063	0.16877
P18944	Cytochrome c oxidase subunit 2 OS=Gallus gallus GN=MT-CO2 PE=3 SV=1 - [COX2_CHICK]	295.13	0.37	3	6	6	91	227	25.6	4.72	-0.0800749	0.450226
P20678	Cytochrome P450 2H2 OS=Gallus gallus GN=CYP2H2 PE=1 SV=1 - [CP2H2_CHICK]	568.17	0.334	6	4	13	63	491	56.4	7.21	0.599209	0.202023
Q5ZML6	Protein FAM210A OS=Gallus gallus GN=FAM210A PE=2 SV=1 - [F210A_CHICK]	45.19	0.1273	1	2	2	2	275	30.4	9.29	-0.107309	0.448859
Q5ZJ73	Protein CREG1 OS=Gallus gallus GN=CREG1 PE=2 SV=1 - [CREG1_CHICK]	76.97	0.1719	1	2	2	6	192	21.1	6.67	0.0844276	0.113088
Q04929	Adapter molecule crk OS=Gallus gallus GN=CRK PE=1 SV=1 - [CRK_CHICK]	69.83	0.1311	1	3	3	3	305	33.8	5.57	0.224351	0.024862
P21868	Casein kinase II subunit alpha OS=Gallus gallus GN=CSNK2A1 PE=2 SV=1 - [CSK21_CHICK]	43.09	0.0946	1	2	2	3	391	45.2	7.74	0.010212	0.907349
Q5ZJF1	COP9 signalosome complex subunit 3 OS=Gallus gallus GN=COPS3 PE=2 SV=1 - [CSN3_CHICK]	37.19	0.0307	1	1	1	1	423	47.9	6.79	#NUM!	#NUM!
Q6QLQ5	Cathelicidin-1 OS=Gallus gallus GN=CATHL1 PE=1 SV=1 - [CTHL1_CHICK]	109.98	0.223	3	2	2	12	148	16.1	8	0.0653749	0.660531
P30997	Catenin alpha-2 OS=Gallus gallus GN=CTNNA2 PE=1 SV=1 - [CTNA2_CHICK]	147.37	0.0552	3	2	4	9	906	100.6	6.29	-0.0445629	0.438455
P00174	Cytochrome b5 OS=Gallus gallus GN=CYB5A PE=1 SV=4 - [CYB5_CHICK]	226.32	0.4638	1	5	5	54	138	15.5	5.15	0.093551	0.308533
P67881	Cytochrome c OS=Gallus gallus GN=CYC PE=1 SV=2 - [CYC_CHICK]	422.22	0.619	1	9	9	77	105	11.7	9.5	0.0044833	0.963072
P01038	Cystatin OS=Gallus gallus PE=1 SV=2 - [CYT_CHICK]	73.06	0.1727	2	2	2	5	139	15.3	7.69	0.0546096	0.647095
P35458	Dynactin subunit 1 OS=Gallus gallus GN=DCTN1 PE=2 SV=2 - [DCTN1_CHICK]	130.33	0.0564	1	5	5	8	1224	135.5	6.54	0.0240808	0.868444
Q9PTG6	Dynactin subunit 2 OS=Gallus gallus GN=DCTN2 PE=2 SV=1 - [DCTN2_CHICK]	115.74	0.092	1	3	3	6	402	45.1	4.98	-0.221051	0.26932
Q5ZJ39	Density-regulated protein OS=Gallus gallus GN=DENR PE=2 SV=1 - [DENR_CHICK]	105.3	0.1515	2	2	2	4	198	22.1	5.21	-0.221198	0.170018
Q8JIS3	D-erythrulose reductase OS=Gallus gallus GN=DER PE=1 SV=1 - [DER_CHICK]	380.22	0.4065	2	8	8	52	246	26.2	7.31	0.0892075	0.149778
P18359	Destrin OS=Gallus gallus GN=DSTN PE=1 SV=3 - [DEST_CHICK]	431.16	0.5515	1	9	10	112	165	18.5	7.59	0.0575624	0.538266
Q9YHT1	Succinate dehydrogenase [ubiquinone] flavoprotein subunit, mitochondrial OS=Gallus gallus GN=SDHA PE=1 SV=2 - [SDHA_CHICK]	606.71	0.4421	1	1	18	64	665	72.9	7.08	0.816114	0.212648
Q5F3Z5	DnaJ homolog subfamily B member 6 OS=Gallus gallus GN=DNAJB6 PE=2 SV=1 - [DNJB6_CHICK]	11.2	0.0307	1	1	1	1	326	36.7	8.84	0.00886483	0.915202
Q5ZI13	DnaJ homolog subfamily C member 3 OS=Gallus gallus GN=DNAJC3 PE=2 SV=1 - [DNJC3_CHICK]	224.29	0.2127	2	10	10	16	503	57.3	5.97	0.0174956	0.838214
Q5ZIP3	Deoxyhypusine hydroxylase OS=Gallus gallus GN=DOHH PE=2 SV=1 - [DOHH_CHICK]	28.31	0.0569	1	1	1	2	299	32.9	4.83	0.121246	0.403851
P00378	Dihydrofolate reductase OS=Gallus gallus GN=DHFR PE=1 SV=1 - [DYR_CHICK]	338.34	0.582	2	1	10	34	189	21.6	8.07	0.0821793	0.324368
P84172	Elongation factor Tu, mitochondrial (Fragment) OS=Gallus gallus GN=TUFM PE=1 SV=1 - [EFTU_CHICK]	590.92	0.4631	1	11	11	69	352	38.2	8.76	-0.0522025	0.340397
Q5ZLE6	Eukaryotic translation initiation factor 3 subunit H OS=Gallus gallus GN=EIF3H PE=2 SV=1 - [EIF3H_CHICK]	198.87	0.2069	1	6	6	7	348	39.5	6.47	0.0820269	0.170925
Q5ZKA4	Eukaryotic translation initiation factor 3 subunit J OS=Gallus gallus GN=EIF3J PE=2 SV=1 - [EIF3J_CHICK]	33.49	0.0516	1	1	1	1	252	28.7	4.84	-0.160506	0.0467524
Q5ZJ64	Eukaryotic translation initiation factor 3 subunit M OS=Gallus gallus GN=EIF3M PE=2 SV=1 - [EIF3M_CHICK]	111.68	0.1444	1	4	4	5	374	42.6	5.53	-0.0512097	0.652145
O93295	Ectonucleoside triphosphate diphosphohydrolase 8 OS=Gallus gallus GN=ENTPD8 PE=1 SV=1 - [ENTP8_CHICK]	155.15	0.1095	3	4	4	10	493	54	6.39	0.132249	0.0906937
P81628	Endoplasmic reticulum resident protein 29 (Fragment) OS=Gallus gallus GN=ERP29 PE=1 SV=2 - [ERP29_CHICK]	321.3	0.5044	1	1	9	42	228	25.4	7.9	-0.0984006	0.614667
Q5ZLR4	Epithelial splicing regulatory protein 2 OS=Gallus gallus GN=ESRP2 PE=2 SV=1 - [ESRP2_CHICK]	103.94	0.097	1	4	4	4	701	76.9	6.6	0.039012	0.482794
Q91348	6-phosphofructo-2-kinase/fructose-2,6-bisphosphatase OS=Gallus gallus PE=2 SV=2 - [F26L_CHICK]	922	0.5319	5	20	20	79	470	54.4	7.21	0.138655	0.0750805
Q804X6	Coagulation factor IX OS=Gallus gallus GN=F9 PE=2 SV=1 - [FA9_CHICK]	95.23	0.0722	2	3	3	5	471	51.8	6.34	0.154539	0.170037
Q05423	Fatty acid-binding protein, brain OS=Gallus gallus GN=FABP7 PE=2 SV=2 - [FABP7_CHICK]	336.92	0.6136	4	8	8	31	132	14.9	5.91	0.00508408	0.966081
P80226	Fatty acid-binding protein, liver OS=Gallus gallus GN=FABP1 PE=1 SV=2 - [FABPL_CHICK]	371.37	0.6111	1	8	8	1042	126	14.2	8.62	0.213326	0.315805
P12276	Fatty acid synthase OS=Gallus gallus GN=FASN PE=1 SV=5 - [FAS_CHICK]	3942.5	0.5625	1	1	92	850	2512	274.6	6.35	-0.0672836	0.789221
Q5ZJ25	Vacuolar protein sorting-associated protein 51 homolog OS=Gallus gallus GN=VPS51 PE=2 SV=1 - [VPS51_CHICK]	30.24	0.0254	1	1	1	1	787	86	6.42	-0.0186981	0.877069
Q02020	Fibrinogen beta chain (Fragment) OS=Gallus gallus GN=FGB PE=1 SV=1 - [FIBB_CHICK]	929.07	0.5529	5	24	24	97	463	52.6	7.36	-0.352275	0.144848
P08836	Farnesyl pyrophosphate synthase OS=Gallus gallus GN=FDPS PE=1 SV=2 - [FPPS_CHICK]	659.87	0.3869	3	16	16	73	367	42.1	6.57	0.0549173	0.457625
P08267	Ferritin heavy chain OS=Gallus gallus GN=FTH PE=2 SV=2 - [FRIH_CHICK]	291.42	0.4333	1	7	7	79	180	21.1	6.21	0.524071	0.00684352
Q8UVD9	Far upstream element-binding protein 2 OS=Gallus gallus GN=KHSRP PE=1 SV=1 - [FUBP2_CHICK]	457.98	0.1743	1	11	12	32	769	80.6	6.9	0.00861602	0.948761
P11183	Glycine cleavage system H protein, mitochondrial OS=Gallus gallus GN=GCSH PE=1 SV=2 - [GCSH_CHICK]	119.43	0.4329	2	4	4	25	164	18	4.98	0.070971	0.588019
P28337	Aminomethyltransferase, mitochondrial OS=Gallus gallus GN=AMT PE=2 SV=2 - [GCST_CHICK]	525.31	0.5434	1	5	13	47	392	42	8.88	-0.0164776	0.701142
O93510	Gelsolin OS=Gallus gallus GN=GSN PE=2 SV=1 - [GELS_CHICK]	490.61	0.2365	2	14	14	28	778	85.8	6.32	-0.178504	0.0307096
Q9PW38	Gephyrin OS=Gallus gallus GN=GPHN PE=1 SV=1 - [GEPH_CHICK]	375.77	0.2636	3	12	12	25	736	79.7	5.71	0.0744395	0.0775029
Q08392	Glutathione S-transferase OS=Gallus gallus PE=2 SV=1 - [GSTA1_CHICK]	430.37	0.5656	1	6	13	85	221	25.3	8.88	0.141603	0.514192
Q08393	Glutathione S-transferase OS=Gallus gallus PE=2 SV=2 - [GSTA2_CHICK]	484.27	0.7568	1	12	14	98	222	25.4	8.73	0.149381	0.34302
P26697	Glutathione S-transferase 3 OS=Gallus gallus PE=1 SV=2 - [GSTA3_CHICK]	693.01	0.7467	1	1	18	175	229	26.3	9.03	0.19506	0.888856
P20136	Glutathione S-transferase 2 OS=Gallus gallus GN=GSTM2 PE=1 SV=4 - [GSTM2_CHICK]	875.43	0.7636	1	18	18	259	220	25.9	7.33	0.0966164	0.316042
P20135	Glutathione S-transferase theta-1 OS=Gallus gallus GN=GSTT1 PE=1 SV=3 - [GSTT1_CHICK]	159.64	0.2069	1	4	5	13	261	29.8	7.11	-0.27692	0.140247
P09987	Histone H1 OS=Gallus gallus PE=1 SV=2 - [H1_CHICK]	224.56	0.156	8	6	6	61	218	21.9	11.12	-0.349132	0.0284033
O93327	Core histone macro-H2A.1 OS=Gallus gallus GN=H2AFY PE=1 SV=3 - [H2AY_CHICK]	87.57	0.0511	1	2	2	5	372	39.6	9.79	0.00376637	0.857425
P02259	Histone H5 OS=Gallus gallus PE=1 SV=2 - [H5_CHICK]	64.74	0.1737	1	3	3	4	190	20.7	12.19	-0.258539	0.551982
P02112	Hemoglobin subunit beta OS=Gallus gallus GN=HBB PE=1 SV=2 - [HBB_CHICK]	755.86	0.9252	3	8	14	711	147	16.5	8.63	-0.161472	0.465372
P56517	Histone deacetylase 1 OS=Gallus gallus GN=HDAC1 PE=2 SV=1 - [HDAC1_CHICK]	57.42	0.0792	3	1	3	4	480	54.9	5.49	-0.0935771	0.482018
Q5ZMB2	Heme-binding protein 1 OS=Gallus gallus GN=HEBP1 PE=2 SV=1 - [HEBP1_CHICK]	248.55	0.5185	2	6	6	13	189	21.1	5.78	0.109543	0.504062
P12902	Non-histone chromosomal protein HMG-14A OS=Gallus gallus PE=3 SV=2 - [HM14A_CHICK]	57.96	0.2667	1	2	2	7	105	11.3	9.48	0.166088	0.46562
P35915	Hydroxymethylglutaryl-CoA lyase, mitochondrial OS=Gallus gallus GN=HMGCL PE=1 SV=1 - [HMGCL_CHICK]	457.87	0.4698	3	10	10	48	298	31.4	7.25	0.108873	0.137405
Q76KB1	Heparan sulfate 2-O-sulfotransferase 1 OS=Gallus gallus GN=HS2ST1 PE=1 SV=1 - [HS2ST_CHICK]	36.99	0.0478	2	1	1	1	356	41.7	8.69	0.0860335	0.0226443
Q00649	Heat shock protein beta-1 OS=Gallus gallus GN=HSPB1 PE=2 SV=1 - [HSPB1_CHICK]	76.51	0.1762	2	2	2	2	193	21.7	6.13	0.057982	0.457955
Q5ZLX2	Eukaryotic translation initiation factor 2 subunit 1 OS=Gallus gallus GN=EIF2S1 PE=2 SV=2 - [IF2A_CHICK]	230.95	0.3048	1	7	7	13	315	36.2	5.14	-0.0237716	0.795711
Q5ZLP8	Insulin-like growth factor 2 mRNA-binding protein 3 OS=Gallus gallus GN=IGF2BP3 PE=2 SV=1 - [IF2B3_CHICK]	248.01	0.1336	2	4	6	16	584	64.3	8.94	-0.0605808	0.366289
Q5ZM36	Eukaryotic initiation factor 4A-III OS=Gallus gallus GN=EIF4A3 PE=2 SV=1 - [IF4A3_CHICK]	246.8	0.2573	1	6	8	26	412	46.8	6.73	-0.0417114	0.723444
Q09121	Eukaryotic translation initiation factor 5A-1 OS=Gallus gallus GN=EIF5A1 PE=1 SV=3 - [IF5A1_CHICK]	216.13	0.3958	1	4	5	29	144	15.9	5.55	-0.0865196	0.574064
Q07460	Eukaryotic translation initiation factor 5A-2 OS=Gallus gallus GN=EIF5A2 PE=1 SV=3 - [IF5A2_CHICK]	117.35	0.2026	1	1	2	8	153	16.7	5.58	-0.148201	0.486097
P01875	Ig mu chain C region OS=Gallus gallus PE=2 SV=2 - [IGHM_CHICK]	398.64	0.2422	1	8	8	43	446	48.1	6.42	-0.0195373	0.871132
P10184	Ovoinhibitor OS=Gallus gallus GN=OIH PE=1 SV=2 - [IOV7_CHICK]	153.12	0.2161	1	3	7	13	472	51.9	6.58	0.0719709	0.556877
Q5ZLQ4	Iron-responsive element-binding protein 2 OS=Gallus gallus GN=IREB2 PE=2 SV=1 - [IREB2_CHICK]	60.44	0.028	2	1	2	11	965	105.3	7.62	-0.155761	0.148552
Q5ZL00	ER membrane protein complex subunit 1 OS=Gallus gallus GN=EMC1 PE=2 SV=1 - [EMC1_CHICK]	130.71	0.0682	2	4	4	4	983	109.8	7.52	-0.216467	0.114572
P05081	Adenylate kinase isoenzyme 1 OS=Gallus gallus GN=AK1 PE=1 SV=1 - [KAD1_CHICK]	63.89	0.1443	1	2	2	2	194	21.7	8.59	-0.193548	0.223717
Q5ZM91	cAMP-dependent protein kinase type I-alpha regulatory subunit OS=Gallus gallus GN=PRKAR1A PE=2 SV=1 - [KAP0_CHICK]	150.42	0.2068	2	5	5	6	382	43.3	5.35	0.0057332	0.937682
P05122	Creatine kinase B-type OS=Gallus gallus GN=CKB PE=1 SV=1 - [KCRB_CHICK]	273.08	0.2572	2	6	6	20	381	42.8	6.37	-0.154577	0.191642
Q5ZKE7	UMP-CMP kinase OS=Gallus gallus GN=CMPK PE=2 SV=1 - [KCY_CHICK]	250.76	0.4184	2	7	7	28	196	22.2	7.21	0.100646	0.460479
Q90631	Kinectin OS=Gallus gallus GN=KTN1 PE=1 SV=1 - [KTN1_CHICK]	392.09	0.1085	2	12	12	22	1364	155.9	5.9	0.0864018	0.325527
P20763	Ig lambda chain C region OS=Gallus gallus PE=4 SV=1 - [LAC_CHICK]	125.73	0.4466	2	3	3	52	103	11.4	6.51	0.0930876	0.736528
P05300	Lysosome-associated membrane glycoprotein 1 OS=Gallus gallus GN=LAMP1 PE=2 SV=1 - [LAMP1_CHICK]	83.03	0.0507	2	2	2	10	414	44.6	7.02	0.00240464	0.949217
P00337	L-lactate dehydrogenase B chain OS=Gallus gallus GN=LDHB PE=1 SV=3 - [LDHB_CHICK]	1110.4	0.7057	1	21	21	583	333	36.3	7.43	0.0715858	0.603109
P02707	Hepatic lectin OS=Gallus gallus PE=1 SV=1 - [LECH_CHICK]	241.01	0.3768	2	7	7	30	207	24.2	6.39	0.0941262	0.521427
P07583	Beta-galactoside-binding lectin OS=Gallus gallus PE=1 SV=2 - [LEG4_CHICK]	72.71	0.2222	1	2	2	3	135	15.1	7.09	-0.245767	0.0943124
P23668	16 kDa beta-galactoside-binding lectin OS=Gallus gallus PE=1 SV=1 - [LEG6_CHICK]	392.6	0.6418	1	11	11	67	134	14.9	5.07	0.00709234	0.924156
Q5ZK33	LETM1 and EF-hand domain-containing protein 1, mitochondrial OS=Gallus gallus GN=LETM1 PE=2 SV=1 - [LETM1_CHICK]	130.47	0.0798	2	5	5	6	752	85.8	6.71	-0.0461658	0.702834
Q9PTR5	Lissencephaly-1 homolog OS=Gallus gallus GN=PAFAH1B1 PE=2 SV=3 - [LIS1_CHICK]	131.07	0.1268	1	4	4	6	410	46.6	7.37	0.0812525	0.020531
P13648	Lamin-A OS=Gallus gallus GN=LMNA PE=2 SV=1 - [LMNA_CHICK]	747	0.3196	1	19	20	89	657	73.1	6.95	0.0983573	0.610743
P14731	Lamin-B1 OS=Gallus gallus GN=LMNB1 PE=2 SV=1 - [LMNB1_CHICK]	141.28	0.113	2	3	6	19	584	66.5	5.2	-0.0673478	0.521512
Q5F464	Lipoma-preferred partner homolog OS=Gallus gallus GN=LPP PE=2 SV=1 - [LPP_CHICK]	24.73	0.0232	1	1	1	1	604	65.1	7.5	-0.048073	0.623538
Q5ZML5	Protein LSM12 homolog OS=Gallus gallus GN=LSM12 PE=2 SV=1 - [LSM12_CHICK]	31.86	0.067	1	1	1	1	194	21.5	7.69	0.0666904	0.512113
P51890	Lumican OS=Gallus gallus GN=LUM PE=1 SV=1 - [LUM_CHICK]	274.18	0.3703	1	9	9	26	343	38.6	6.52	-0.0927085	0.510974
P28318	Protein MRP-126 OS=Gallus gallus PE=2 SV=1 - [M126_CHICK]	113.7	0.2269	2	2	2	37	119	14.1	6.96	-0.0776029	0.576046
P16527	Myristoylated alanine-rich C-kinase substrate OS=Gallus gallus GN=MARCKS PE=1 SV=2 - [MARCS_CHICK]	201.91	0.3772	1	5	5	13	281	27.7	4.44	0.188592	0.475055
Q5ZLC7	Microtubule-associated protein RP/EB family member 1 OS=Gallus gallus GN=MAPRE1 PE=2 SV=1 - [MARE1_CHICK]	263.68	0.2326	1	6	6	12	258	29.1	5.14	0.0225525	0.682016
Q5ZI42	Malignant T-cell-amplified sequence 1 OS=Gallus gallus GN=MCTS1 PE=2 SV=1 - [MCTS1_CHICK]	75.59	0.1989	1	2	2	6	181	20.6	8.82	0.091833	0.0270413
Q5ZME2	Malate dehydrogenase, cytoplasmic OS=Gallus gallus GN=MDH1 PE=2 SV=1 - [MDHC_CHICK]	640.19	0.482	1	16	16	108	334	36.5	7.36	0.11043	0.14749
P50594	Protein mago nashi homolog OS=Gallus gallus GN=MAGOH PE=2 SV=2 - [MGN_CHICK]	38.22	0.2397	1	2	2	2	146	17.1	6.39	-0.092493	0.453516
Q02960	Macrophage migration inhibitory factor OS=Gallus gallus GN=MIF PE=3 SV=3 - [MIF_CHICK]	131.51	0.6435	2	4	4	35	115	12.5	7.37	0.217493	0.102844
Q9W6H0	Mimecan OS=Gallus gallus GN=OGN PE=2 SV=1 - [MIME_CHICK]	244.77	0.2313	1	7	7	22	294	33.2	6.55	-0.324493	0.231928
P09540	Myosin light chain, embryonic OS=Gallus gallus PE=2 SV=1 - [MLEX_CHICK]	387.12	0.6865	2	9	10	31	185	20.6	5.1	0.0967677	0.355271
Q5F495	MOB-like protein phocein OS=Gallus gallus GN=MOB4 PE=2 SV=1 - [PHOCN_CHICK]	47.18	0.0673	2	1	1	1	223	25.8	5.96	#NUM!	#NUM!
Q5ZKD7	Putative helicase MOV-10 OS=Gallus gallus GN=MOV10 PE=2 SV=1 - [MOV10_CHICK]	192.04	0.1293	2	9	9	9	967	109	8.78	-0.0820555	0.381604
Q91955	Myotrophin OS=Gallus gallus GN=MTPN PE=3 SV=1 - [MTPN_CHICK]	121.83	0.3814	2	3	3	11	118	12.9	5.29	0.0254557	0.896503
P68497	Metallothionein OS=Gallus gallus PE=1 SV=1 - [MT_CHICK]	116.45	0.746	1	4	4	5	63	6.5	7.96	-0.438259	0.447758
P10587	Myosin-11 OS=Gallus gallus GN=MYH11 PE=1 SV=4 - [MYH11_CHICK]	3083.85	0.4593	3	66	82	281	1979	228.7	5.55	0.102019	0.422526
P14105	Myosin-9 OS=Gallus gallus GN=MYH9 PE=2 SV=1 - [MYH9_CHICK]	3955.71	0.5059	3	79	96	398	1959	226.4	5.57	-0.0834854	0.37241
P02607	Myosin light polypeptide 6 OS=Gallus gallus GN=MYL6 PE=1 SV=3 - [MYL6_CHICK]	322.31	0.4172	1	6	7	33	151	17	4.59	0.0579292	0.689435
Q5ZHX7	NADH-cytochrome b5 reductase 2 OS=Gallus gallus GN=CYB5R2 PE=2 SV=1 - [NB5R2_CHICK]	173.45	0.25	1	1	6	13	304	33.6	9.38	0.229426	0.193454
P62758	Neurocalcin-delta OS=Gallus gallus GN=NCALD PE=2 SV=2 - [NCALD_CHICK]	40.87	0.171	1	2	2	3	193	22.2	5.35	-0.0999884	0.245172
Q5ZJZ6	Nuclear cap-binding protein subunit 1 OS=Gallus gallus GN=NCBP1 PE=2 SV=1 - [NCBP1_CHICK]	35.37	0.0151	1	1	1	1	793	92.5	6.29	-0.154599	0.10713
O57535	Nucleoside diphosphate kinase OS=Gallus gallus PE=2 SV=1 - [NDK_CHICK]	435.52	0.8889	4	12	13	88	153	17.3	7.9	0.129682	0.293109
P25207	Nuclear transcription factor Y subunit beta OS=Gallus gallus GN=NFYB PE=2 SV=2 - [NFYB_CHICK]	63.29	0.1024	1	1	1	1	205	22.6	4.59	0.0372595	0.514345
Q07598	Non-specific lipid-transfer protein (Fragment) OS=Gallus gallus GN=SCP2 PE=2 SV=1 - [NLTP_CHICK]	902.96	0.4717	1	1	22	133	547	58.7	8.19	0.0668025	0.773947
Q5ZID0	NmrA-like family domain-containing protein 1 OS=Gallus gallus GN=NMRAL1 PE=2 SV=1 - [NMRL1_CHICK]	87.39	0.1149	1	3	3	4	296	32.7	8.05	0.127983	0.721302
Q5ZK10	NSFL1 cofactor p47 OS=Gallus gallus GN=NSFL1C PE=2 SV=1 - [NSF1C_CHICK]	150.28	0.1545	2	4	4	10	369	40.6	5.15	0.149356	0.34657
Q5ZM25	Obg-like ATPase 1 OS=Gallus gallus GN=OLA1 PE=2 SV=1 - [OLA1_CHICK]	189.94	0.2247	1	6	6	15	396	44.8	8.07	-0.0203643	0.79076
Q90Z16	Optineurin OS=Gallus gallus GN=OPTN PE=1 SV=1 - [OPTN_CHICK]	30.5	0.0234	1	1	1	1	556	64	5	0.0437563	0.772989
P48440	Dolichyl-diphosphooligosaccharide--protein glycosyltransferase 48 kDa subunit OS=Gallus gallus GN=DDOST PE=1 SV=1 - [OST48_CHICK]	340.78	0.2639	2	10	10	32	413	45.9	5.58	-0.00319496	0.986723
Q5ZJR3	Oligosaccharyltransferase complex subunit OSTC OS=Gallus gallus GN=OSTC PE=2 SV=1 - [OSTC_CHICK]	53.72	0.0805	1	1	1	5	149	16.7	9.44	0.0146279	0.854914
Q5ZJJ9	Osteoclast-stimulating factor 1 OS=Gallus gallus GN=OSTF1 PE=2 SV=1 - [OSTF1_CHICK]	189.67	0.2525	2	4	4	11	202	22.3	8.13	0.0118352	0.952315
Q5ZMS2	Platelet-activating factor acetylhydrolase IB subunit beta OS=Gallus gallus GN=PAFAH1B2 PE=2 SV=1 - [PA1B2_CHICK]	96.18	0.1747	2	3	3	8	229	25.6	6.21	-0.01208	0.857989
P49147	Cytosolic phospholipase A2 OS=Gallus gallus GN=PLA2G4A PE=1 SV=1 - [PA24A_CHICK]	45.47	0.0495	1	2	2	2	748	84.9	5.2	0.0108288	0.9034
Q8JHZ8	Paladin OS=Gallus gallus GN=PALD1 PE=2 SV=2 - [PALD_CHICK]	27.78	0.0092	2	1	1	2	868	99.6	7.08	#NUM!	#NUM!
P21642	Phosphoenolpyruvate carboxykinase [GTP], mitochondrial OS=Gallus gallus GN=PCK2 PE=1 SV=2 - [PCKGM_CHICK]	2033.77	0.7504	1	23	38	929	641	71.1	7.61	-0.0593759	0.478558
Q8JG64	Protein disulfide-isomerase A3 OS=Gallus gallus GN=PDIA3 PE=2 SV=1 - [PDIA3_CHICK]	1582.31	0.6812	1	40	40	321	505	56.1	6.02	0.0801714	0.555037
Q5F3U9	Sister chromatid cohesion protein PDS5 homolog B OS=Gallus gallus GN=PDS5B PE=2 SV=3 - [PDS5B_CHICK]	29.52	0.0142	2	1	1	1	1412	160.9	8.05	0.119502	0.0322235
Q5F4B1	Phosphoglycolate phosphatase OS=Gallus gallus GN=PGP PE=2 SV=1 - [PGP_CHICK]	261.18	0.2949	1	3	7	20	312	33	5.73	0.0626038	0.416261
Q5ZKN2	Membrane-associated progesterone receptor component 1 OS=Gallus gallus GN=PGRMC1 PE=2 SV=3 - [PGRC1_CHICK]	235.71	0.2813	1	4	5	13	192	21.3	4.81	-0.0548959	0.259759
Q5ZMN3	Prohibitin-2 OS=Gallus gallus GN=PHB2 PE=2 SV=1 - [PHB2_CHICK]	724.52	0.588	2	15	15	61	301	33.3	9.89	0.0717426	0.594948
P84173	Prohibitin OS=Gallus gallus GN=PHB PE=1 SV=1 - [PHB_CHICK]	820.7	0.7831	3	15	15	136	272	29.9	5.76	0.0661199	0.27479
O73930	Pterin-4-alpha-carbinolamine dehydratase OS=Gallus gallus GN=PCBD1 PE=2 SV=3 - [PHS_CHICK]	187.5	0.4904	2	4	5	46	104	12	6.52	0.224871	0.136409
Q5ZKG5	Low molecular weight phosphotyrosine protein phosphatase OS=Gallus gallus GN=ACP1 PE=2 SV=3 - [PPAC_CHICK]	263.27	0.6709	1	8	8	24	158	18.2	7.2	0.119336	0.381899
Q92058	Alkaline phosphatase, tissue-nonspecific isozyme OS=Gallus gallus GN=ALPL PE=2 SV=1 - [PPBT_CHICK]	75.32	0.0944	2	4	4	5	519	56.7	7.03	0.482327	0.340101
P24367	Peptidyl-prolyl cis-trans isomerase B OS=Gallus gallus GN=PPIB PE=2 SV=1 - [PPIB_CHICK]	325.44	0.401	1	3	9	65	207	22.4	9.39	0.144446	0.465472
Q5ZMA2	Pre-mRNA-processing factor 19 OS=Gallus gallus GN=PRPF19 PE=1 SV=1 - [PRP19_CHICK]	116.15	0.0812	2	3	3	5	505	55.1	6.67	0.25394	0.112056
Q5ZI49	Ribose-phosphate pyrophosphokinase 2 OS=Gallus gallus GN=PRPS2 PE=2 SV=1 - [PRPS2_CHICK]	571.95	0.3938	1	5	11	106	325	35.6	6.84	0.181114	0.246256
O42265	Proteasome subunit alpha type-1 OS=Gallus gallus GN=PSMA1 PE=2 SV=2 - [PSA1_CHICK]	342.23	0.5538	2	11	11	25	260	28.9	6.54	0.0760893	0.371504
P34065	Proteasome subunit beta type-5 (Fragment) OS=Gallus gallus GN=PSMB5 PE=2 SV=2 - [PSB5_CHICK]	368.81	0.5078	1	8	8	25	256	27	8.68	0.0517914	0.277486
P84169	26S proteasome non-ATPase regulatory subunit 13 OS=Gallus gallus GN=PSMD13 PE=1 SV=1 - [PSD13_CHICK]	98.27	0.0984	2	3	3	7	376	42.7	5.57	-0.0766385	0.240902
Q5F418	26S proteasome non-ATPase regulatory subunit 1 OS=Gallus gallus GN=PSMD1 PE=2 SV=1 - [PSMD1_CHICK]	432.06	0.2031	2	13	13	23	955	106	5.36	-0.0668222	0.466017
Q5F3J5	Proteasome activator complex subunit 3 OS=Gallus gallus GN=PSME3 PE=1 SV=1 - [PSME3_CHICK]	72.54	0.0945	1	2	2	2	254	29.5	6.19	-0.141476	0.131112
Q5ZK88	Paraspeckle component 1 OS=Gallus gallus GN=PSPC1 PE=2 SV=1 - [PSPC1_CHICK]	205.92	0.1644	1	6	6	10	523	58.4	6.7	0.0712891	0.586935
Q5ZM57	Very-long-chain (3R)-3-hydroxyacyl-[acyl-carrier protein] dehydratase OS=Gallus gallus GN=PTPLAD1 PE=2 SV=1 - [HACD_CHICK]	59.18	0.0746	2	3	3	6	362	42.8	9.06	-0.195015	0.247528
Q90687	Tyrosine-protein phosphatase non-receptor type 11 OS=Gallus gallus GN=PTPN11 PE=2 SV=1 - [PTN11_CHICK]	50.32	0.0523	1	2	2	3	593	67.9	7.2	-0.0699675	0.276076
O13016	Tyrosine-protein phosphatase non-receptor type 1 OS=Gallus gallus GN=PTPN1 PE=1 SV=1 - [PTN1_CHICK]	22.22	0.0346	1	1	1	1	434	50.3	6.07	#NUM!	#NUM!
P21872	Trifunctional purine biosynthetic protein adenosine-3 OS=Gallus gallus GN=GART PE=2 SV=1 - [PUR2_CHICK]	2404.3	0.6899	8	53	53	362	1003	106.5	7.58	0.0393824	0.106651
P38024	Multifunctional protein ADE2 OS=Gallus gallus GN=AIRC PE=2 SV=1 - [PUR6_CHICK]	1271.82	0.6643	4	26	26	292	426	47.2	7.93	-0.0957389	0.331646
P21265	Adenylosuccinate lyase OS=Gallus gallus GN=ADSL PE=2 SV=2 - [PUR8_CHICK]	698.45	0.5794	5	19	19	78	485	54.6	7.12	0.0663384	0.554834
Q5ZIT5	Ras-related protein Rab-10 OS=Gallus gallus GN=RAB10 PE=2 SV=1 - [RAB10_CHICK]	164.78	0.24	10	2	4	21	200	22.5	8.38	-0.105704	0.0294712
Q5ZLG1	Ras-related protein Rab-18 OS=Gallus gallus GN=RAB18 PE=2 SV=1 - [RAB18_CHICK]	102.68	0.1845	1	3	3	5	206	22.9	5.36	-0.184048	0.0172783
Q90965	Ras-related protein Rab-2A OS=Gallus gallus GN=RAB2A PE=2 SV=1 - [RAB2A_CHICK]	294.54	0.3915	1	8	8	22	212	23.5	6.39	-0.0163411	0.562343
Q98932	Ras-related protein Rab-5C OS=Gallus gallus GN=RAB5C PE=1 SV=1 - [RAB5C_CHICK]	191.16	0.3796	1	3	5	12	216	23.5	8.41	0.106498	0.358548
Q1KME6	Ras-related protein Rab-6A OS=Gallus gallus GN=RAB6A PE=2 SV=3 - [RAB6A_CHICK]	180.78	0.2356	10	3	4	12	208	23.5	5.54	0.00377815	0.934146
Q5F470	Ras-related protein Rab-8A OS=Gallus gallus GN=RAB8A PE=2 SV=1 - [RAB8A_CHICK]	159.52	0.2077	9	1	4	19	207	23.5	9.09	-0.083235	0.523763
P08642	GTPase HRas OS=Gallus gallus GN=HRAS PE=1 SV=1 - [RASH_CHICK]	46.73	0.1376	2	2	2	4	189	21.4	5.31	-0.0715576	0.103698
Q5ZJN2	Ras-related protein Rab-11A OS=Gallus gallus GN=RAB11A PE=2 SV=1 - [RB11A_CHICK]	74.73	0.0972	3	2	2	5	216	24.4	6.57	0.0682675	0.327249
Q5ZHM5	Protein RER1 OS=Gallus gallus GN=RER1 PE=2 SV=1 - [RER1_CHICK]	54	0.0918	1	2	2	3	196	23	9.51	-0.112432	0.265589
P41263	Retinol-binding protein 4 OS=Gallus gallus GN=RBP4 PE=1 SV=1 - [RET4_CHICK]	172.38	0.3827	1	5	5	19	196	22.5	6.34	-0.122375	0.175897
Q5ZJJ2	Replication protein A 70 kDa DNA-binding subunit OS=Gallus gallus GN=RPA1 PE=2 SV=1 - [RFA1_CHICK]	104.34	0.0733	1	4	4	5	614	68	7.85	0.104193	0.0332092
Q08200	60S ribosomal protein L10 (Fragment) OS=Gallus gallus GN=RPL10 PE=2 SV=1 - [RL10_CHICK]	198.43	0.3571	2	6	6	15	210	24	10.13	-0.131801	0.788252
P41125	60S ribosomal protein L13 OS=Gallus gallus GN=RPL13 PE=2 SV=2 - [RL13_CHICK]	259.98	0.2796	1	6	6	17	211	24.4	11.75	-0.174144	0.748406
P67883	60S ribosomal protein L30 OS=Gallus gallus GN=RPL30 PE=3 SV=2 - [RL30_CHICK]	269.75	0.4783	2	6	6	31	115	12.8	9.63	0.0322418	0.653862
Q98TF6	60S ribosomal protein L36 OS=Gallus gallus GN=RPL36 PE=3 SV=1 - [RL36_CHICK]	101.97	0.3429	3	4	4	8	105	12.3	11.34	-0.373855	0.351995
Q98TF5	60S ribosomal protein L39 OS=Gallus gallus GN=RPL39 PE=3 SV=1 - [RL39_CHICK]	36.53	0.1961	1	1	1	3	51	6.4	12.48	#NUM!	#NUM!
P47826	60S acidic ribosomal protein P0 OS=Gallus gallus GN=RPLP0 PE=2 SV=1 - [RLA0_CHICK]	590.58	0.4968	2	14	14	66	316	34.3	5.99	0.0106644	0.71181
P18660	60S acidic ribosomal protein P1 OS=Gallus gallus GN=RPLP1 PE=3 SV=1 - [RLA1_CHICK]	140.23	0.5702	1	3	3	23	114	11.5	4.21	-0.0259695	0.711406
Q5ZI69	39S ribosomal protein L37, mitochondrial OS=Gallus gallus GN=MRPL37 PE=2 SV=2 - [RM37_CHICK]	62.37	0.0629	2	2	2	3	429	49.3	9.61	0.0441886	0.713398
Q5ZLC1	39S ribosomal protein L50, mitochondrial OS=Gallus gallus GN=MRPL50 PE=2 SV=1 - [RM50_CHICK]	29.23	0.0932	2	1	1	2	161	18	8.94	0.118211	0.128983
P84175	40S ribosomal protein S12 OS=Gallus gallus GN=RPS12 PE=1 SV=2 - [RS12_CHICK]	221.55	0.5455	1	7	7	33	132	14.5	7.21	0.0801807	0.46811
P08636	40S ribosomal protein S17 OS=Gallus gallus GN=RPS17 PE=2 SV=3 - [RS17_CHICK]	268.22	0.4963	2	6	6	35	135	15.5	9.85	0.000160853	0.999207
P30374	Ribonuclease homolog OS=Gallus gallus PE=2 SV=1 - [RSFR_CHICK]	57.37	0.1079	1	1	1	3	139	15.9	9.94	-0.0495177	0.575609
Q9PV94	Small nuclear ribonucleoprotein-associated protein B' OS=Gallus gallus GN=SNRPB PE=2 SV=1 - [RSMB_CHICK]	113.81	0.0667	2	3	3	8	240	24.6	11.19	0.0996343	0.405976
Q98953	Protein S100-A6 OS=Gallus gallus GN=S100A6 PE=3 SV=1 - [S10A6_CHICK]	23.5	0.163	1	1	1	1	92	10.3	5.01	-0.115481	0.428491
P27003	Protein S100-A10 OS=Gallus gallus GN=S100A10 PE=3 SV=2 - [S10AA_CHICK]	23.86	0.1031	1	1	1	2	97	11.3	7.39	-0.217722	0.144921
P24479	Protein S100-A11 OS=Gallus gallus GN=S100A11 PE=1 SV=2 - [S10AB_CHICK]	30.84	0.1188	1	1	1	1	101	11.4	6.54	0.241249	0.255714
Q5ZJW4	Vesicle-trafficking protein SEC22b OS=Gallus gallus GN=SEC22B PE=2 SV=1 - [SC22B_CHICK]	377.75	0.5907	1	9	9	21	215	24.7	8.72	0.0168949	0.780665
Q5ZK03	Protein transport protein Sec23A OS=Gallus gallus GN=SEC23A PE=2 SV=1 - [SC23A_CHICK]	197.04	0.0991	1	3	6	19	767	86.2	6.79	-0.090266	0.344924
Q9IAY5	Protein syndesmos OS=Gallus gallus GN=SDOS PE=1 SV=3 - [SDOS_CHICK]	273.04	0.3025	1	8	8	22	314	33.3	6.13	-0.0317986	0.673572
Q5ZMH1	Septin-2 OS=Gallus gallus GN=SEPT2 PE=2 SV=1 - [SEPT2_CHICK]	326.94	0.3324	2	4	10	25	349	40.2	6.55	-0.116525	0.162667
P13731	Serpin H1 OS=Gallus gallus GN=SERPINH1 PE=1 SV=2 - [SERPH_CHICK]	198.74	0.1506	1	5	5	25	405	45.7	8.72	-0.0399083	0.74334
Q5ZML3	Serine/arginine-rich splicing factor 1 OS=Gallus gallus GN=SRSF1 PE=1 SV=3 - [SRSF1_CHICK]	374.07	0.393	3	11	11	52	257	28	6.95	0.0177489	0.8864
P30352	Serine/arginine-rich splicing factor 2 OS=Gallus gallus GN=SRSF2 PE=2 SV=1 - [SRSF2_CHICK]	129.63	0.1131	1	2	2	10	221	25.5	11.85	-0.0348296	0.849238
Q8AXV0	Endophilin-A2 OS=Gallus gallus GN=SH3GL1 PE=1 SV=1 - [SH3G1_CHICK]	84.05	0.1199	1	2	3	4	367	41.7	5.44	-0.0301354	0.800219
Q5ZIR1	Endophilin-B1 OS=Gallus gallus GN=SH3GLB1 PE=2 SV=1 - [SHLB1_CHICK]	49.78	0.0628	1	2	2	2	366	40.8	6.29	0.0749071	0.3278
P80566	Superoxide dismutase [Cu-Zn] OS=Gallus gallus GN=SOD1 PE=1 SV=3 - [SODC_CHICK]	250.56	0.4935	1	1	6	160	154	15.7	6.6	-1.01571	0.121373
O73790	Heterochromatin-associated protein MENT OS=Gallus gallus GN=SERPINB10 PE=1 SV=1 - [SPB10_CHICK]	28.29	0.0244	1	1	1	1	410	47.4	9.36	0.105491	0.462882
P28687	Signal peptidase complex subunit 3 OS=Gallus gallus GN=SPC22 PE=1 SV=1 - [SPCS3_CHICK]	36.49	0.0556	1	1	1	1	180	20.2	8.65	0.05765	0.63587
Q90XD2	Agmatinase, mitochondrial OS=Gallus gallus GN=AGMAT PE=2 SV=1 - [SPEB_CHICK]	265.78	0.3706	1	8	8	29	340	36.5	6.39	-0.0388802	0.825373
Q5ZJQ7	RNA polymerase II subunit A C-terminal domain phosphatase SSU72 OS=Gallus gallus GN=SSU72 PE=2 SV=1 - [SSU72_CHICK]	44.94	0.0619	1	1	1	1	194	22.6	5.33	-0.238265	0.183251
Q8JG30	Sulfotransferase family cytosolic 1B member 1 OS=Gallus gallus GN=SULT1B1 PE=2 SV=1 - [ST1B1_CHICK]	203.11	0.4223	1	6	7	16	296	34.1	7.18	-0.0646383	0.559425
Q6DV79	Signal transducer and activator of transcription 3 OS=Gallus gallus GN=STAT3 PE=1 SV=2 - [STAT3_CHICK]	384.4	0.201	1	11	12	29	771	88.1	6.3	-0.114291	0.248671
Q5ZL33	Serine-threonine kinase receptor-associated protein OS=Gallus gallus GN=STRAP PE=2 SV=2 - [STRAP_CHICK]	138.81	0.1686	1	4	4	7	350	38.1	5.11	0.0432309	0.348506
P07850	Sulfite oxidase OS=Gallus gallus GN=SUOX PE=1 SV=3 - [SUOX_CHICK]	463.46	0.3159	1	10	10	51	459	50.2	6.18	0.0161268	0.74802
Q800L1	Surfeit locus protein 1 OS=Gallus gallus GN=SURF1 PE=3 SV=1 - [SURF1_CHICK]	45.1	0.0453	1	1	1	1	309	35.2	9.74	-0.270576	0.220766
Q800K9	Surfeit locus protein 4 OS=Gallus gallus GN=SURF4 PE=2 SV=1 - [SURF4_CHICK]	94.68	0.1524	1	3	3	4	269	30.6	7.78	-0.311983	0.166621
Q5ZJQ2	Phenylalanine--tRNA ligase alpha subunit OS=Gallus gallus GN=FARSA PE=1 SV=1 - [SYFA_CHICK]	261.13	0.2077	2	7	7	17	443	49.5	8.92	0.0313335	0.203203
Q5ZII6	Protein kish-A OS=Gallus gallus GN=TMEM167A PE=3 SV=1 - [KISHA_CHICK]	25.69	0.125	1	1	1	1	72	8	8.92	0.0439651	0.824224
P19966	Transgelin OS=Gallus gallus GN=TAGLN PE=1 SV=3 - [TAGL_CHICK]	164.75	0.27	1	5	5	18	200	22.3	8.81	0.225137	0.257114
Q0GFE9	Thymosin beta 15 OS=Gallus gallus PE=4 SV=1 - [Q0GFE9_CHICK]	44.88	0.2444	2	1	2	4	45	5.2	6.61	-0.0682575	0.885921
Q5ZK63	Activated RNA polymerase II transcriptional coactivator p15 OS=Gallus gallus GN=SUB1 PE=2 SV=1 - [TCP4_CHICK]	112.2	0.3016	2	3	3	9	126	14.2	9.57	-0.00200243	0.984663
Q5ZJ54	T-complex protein 1 subunit zeta OS=Gallus gallus GN=CCT6 PE=1 SV=3 - [TCPZ_CHICK]	681.51	0.4038	2	17	17	78	530	57.6	6.81	0.00162373	0.963519
P43347	Translationally-controlled tumor protein homolog OS=Gallus gallus GN=TPT1 PE=2 SV=1 - [TCTP_CHICK]	92.09	0.1686	1	3	3	8	172	19.5	5	-0.00275706	0.968316
Q90955	Prostaglandin E synthase 3 (Fragment) OS=Gallus gallus GN=PTGES3 PE=1 SV=1 - [TEBP_CHICK]	84.76	0.274	1	3	3	9	146	16.9	4.41	-0.013281	0.879894
Q04205	Tensin OS=Gallus gallus GN=TNS PE=1 SV=2 - [TENS_CHICK]	157.77	0.0413	2	5	5	7	1744	187.1	7.34	0.0278736	0.544393
Q90997	Transferrin receptor protein 1 OS=Gallus gallus GN=TFRC PE=2 SV=2 - [TFR1_CHICK]	126.21	0.0722	2	3	3	4	776	85.6	5.78	-0.0399079	0.787723
Q01841	Protein-glutamine gamma-glutamyltransferase 2 OS=Gallus gallus GN=TGL2 PE=1 SV=3 - [TGM2_CHICK]	864.24	0.3701	1	1	22	84	689	77.9	5.01	0.174279	0.559937
P25324	Thiosulfate sulfurtransferase OS=Gallus gallus GN=TST PE=1 SV=1 - [THTR_CHICK]	240.23	0.4118	1	1	8	41	289	32.3	7.01	0.159076	0.666574
Q90679	Thymocyte nuclear protein 1 OS=Gallus gallus GN=THYN1 PE=1 SV=1 - [THYN1_CHICK]	159.91	0.2107	1	5	5	11	242	27.9	8.29	-0.0373952	0.712923
Q5F4B3	Trimethyllysine dioxygenase, mitochondrial OS=Gallus gallus GN=TMLHE PE=2 SV=1 - [TMLH_CHICK]	89.34	0.0622	1	2	2	3	418	48.6	7.81	0.0381215	0.607794
P00940	Triosephosphate isomerase OS=Gallus gallus GN=TPI1 PE=1 SV=2 - [TPIS_CHICK]	842.17	0.8629	1	18	18	255	248	26.6	7.2	0.196037	0.0980951
P27731	Transthyretin OS=Gallus gallus GN=TTR PE=1 SV=1 - [TTHY_CHICK]	320.47	0.6867	1	7	7	53	150	16.3	5.24	-0.198782	0.232994
Q5F3X4	116 kDa U5 small nuclear ribonucleoprotein component OS=Gallus gallus GN=EFTUD2 PE=2 SV=1 - [U5S1_CHICK]	314.09	0.1759	1	10	10	14	972	109.4	5	-0.10272	0.134414
Q5ZHZ0	Spliceosome RNA helicase DDX39B OS=Gallus gallus GN=DDX39B PE=2 SV=1 - [DX39B_CHICK]	359.27	0.2523	1	9	9	28	428	49	5.67	-0.0393835	0.580392
Q5F3Z3	Ubiquitin-conjugating enzyme E2 variant 2 OS=Gallus gallus GN=UBE2V2 PE=2 SV=1 - [UB2V2_CHICK]	191.76	0.3681	2	4	4	12	144	16.3	8.09	0.0130451	0.918354
Q5ZLR5	Cytochrome b-c1 complex subunit Rieske, mitochondrial OS=Gallus gallus GN=UQCRFS1 PE=1 SV=1 - [UCRI_CHICK]	420.47	0.4669	1	9	9	41	272	29.4	8.43	-0.0135278	0.807129
Q5F3T9	UDP-glucose 6-dehydrogenase OS=Gallus gallus GN=UGDH PE=2 SV=1 - [UGDH_CHICK]	1112.66	0.6984	1	28	28	121	494	55	7.27	0.0363896	0.697328
P12003	Vinculin OS=Gallus gallus GN=VCL PE=1 SV=4 - [VINC_CHICK]	1193.35	0.3692	3	31	31	93	1135	124.5	5.58	0.054213	0.642262
P47990	Xanthine dehydrogenase/oxidase OS=Gallus gallus GN=XDH PE=1 SV=1 - [XDH_CHICK]	1471.19	0.377	2	38	38	163	1358	149.5	7.2	-0.0183454	0.759888
E1C6N0	Uncharacterized protein OS=Gallus gallus GN=PSMD14 PE=2 SV=2 - [E1C6N0_CHICK]	212.04	0.2419	2	5	5	13	310	34.5	6.46	-0.0609659	0.232346
F2Z4K8	Uncharacterized protein (Fragment) OS=Gallus gallus GN=CALM1 PE=2 SV=1 - [F2Z4K8_CHICK]	201.97	0.3378	4	5	5	40	148	16.7	4.22	0.0011464	0.994222
F1NG46	Uncharacterized protein OS=Gallus gallus GN=TFAM PE=4 SV=1 - [F1NG46_CHICK]	143.41	0.1832	3	5	5	9	262	29.9	10.29	-0.0569175	0.604849
E1BW98	Uncharacterized protein OS=Gallus gallus GN=GNB4 PE=4 SV=2 - [E1BW98_CHICK]	199.57	0.2176	1	2	5	24	340	37.5	6.28	-0.0338937	0.633431
R4GLJ2	Uncharacterized protein OS=Gallus gallus GN=LOC100858091 PE=4 SV=1 - [R4GLJ2_CHICK]	215.04	0.5833	1	6	6	14	120	12.7	8.12	-0.0208576	0.804538
F1NDK8	Uncharacterized protein OS=Gallus gallus GN=GALNT2 PE=3 SV=2 - [F1NDK8_CHICK]	18.95	0.0188	1	1	1	2	533	60.7	7.28	-0.189061	0.0339312
F1P010	Uncharacterized protein (Fragment) OS=Gallus gallus PE=4 SV=2 - [F1P010_CHICK]	143.58	0.4107	1	5	5	11	168	19.7	8.43	-0.0130195	0.83961
Q802A0	Histidine ammonia-lyase OS=Gallus gallus GN=HAL PE=2 SV=1 - [Q802A0_CHICK]	366.85	0.2364	2	10	11	31	660	72.9	6.62	-0.0022808	0.973656
F1NWT0	Uncharacterized protein OS=Gallus gallus GN=ACACA PE=4 SV=2 - [F1NWT0_CHICK]	1592.59	0.2762	4	48	48	108	2324	262.5	6.46	0.042943	0.779368
E1C9C4	Uncharacterized protein OS=Gallus gallus GN=HMGCS2 PE=4 SV=2 - [E1C9C4_CHICK]	1177.52	0.6375	2	23	23	598	502	55.1	8.24	0.0557261	0.648517
F1NCI6	60S ribosomal protein L7 (Fragment) OS=Gallus gallus GN=RPL7 PE=3 SV=1 - [F1NCI6_CHICK]	283.4	0.3633	3	8	8	36	245	28.7	10.83	0.0650332	0.619629
E1C5Y7	Uncharacterized protein OS=Gallus gallus GN=PLA2R1 PE=4 SV=1 - [E1C5Y7_CHICK]	59.78	0.0206	1	3	3	3	1459	168.5	6.4	-0.164638	0.154117
F1NPN3	Uncharacterized protein OS=Gallus gallus PE=3 SV=2 - [F1NPN3_CHICK]	26.43	0.0245	1	1	1	1	408	47.5	8.78	-0.117763	0.614451
F1NFC0	Nuclease-sensitive element-binding protein 1 (Fragment) OS=Gallus gallus GN=YBX1 PE=2 SV=2 - [F1NFC0_CHICK]	282.79	0.3494	6	4	5	19	269	31.1	9.98	-0.0613957	0.771608
E1C9B8	Uncharacterized protein OS=Gallus gallus PE=4 SV=2 - [E1C9B8_CHICK]	123.85	0.0976	2	1	2	11	369	39.6	9.66	0.137175	0.240876
F1NTV6	Uncharacterized protein OS=Gallus gallus GN=UGGT1 PE=4 SV=2 - [F1NTV6_CHICK]	478.22	0.1392	2	16	16	25	1523	173.5	5.5	-0.108578	0.142899
F1NGS9	Uncharacterized protein OS=Gallus gallus GN=PDE12 PE=4 SV=2 - [F1NGS9_CHICK]	32.64	0.0257	1	1	1	2	584	64.4	7.28	0.122267	0.499231
E1C3Y2	Uncharacterized protein OS=Gallus gallus GN=HGD PE=4 SV=2 - [E1C3Y2_CHICK]	596.72	0.508	1	14	14	98	439	49.4	6.81	-0.00592581	0.942483
E1C303	Uncharacterized protein OS=Gallus gallus GN=GBE1 PE=4 SV=2 - [E1C303_CHICK]	983.61	0.4885	1	23	23	114	655	75.7	6.42	0.19613	0.0448184
F1NY25	Cytoplasmic aconitate hydratase OS=Gallus gallus GN=ACO1 PE=2 SV=1 - [F1NY25_CHICK]	1568.49	0.5084	10	35	36	332	889	98	7.33	0.142996	0.169463
Q5ZLA7	Uncharacterized protein OS=Gallus gallus GN=LOC100857165 PE=2 SV=1 - [Q5ZLA7_CHICK]	300.25	0.1745	1	10	11	32	705	80.5	7.99	0.049431	0.669289
F1NJ10	Uncharacterized protein (Fragment) OS=Gallus gallus GN=SLC25A6 PE=3 SV=2 - [F1NJ10_CHICK]	581.82	0.4107	1	5	14	135	319	35	9.96	0.0127871	0.893396
C7G537	ADF actin binding protein OS=Gallus gallus GN=COTL1 PE=2 SV=1 - [C7G537_CHICK]	133.57	0.3732	1	5	5	14	142	16.1	5.44	0.154344	0.178664
F1NPD1	Uncharacterized protein OS=Gallus gallus GN=LOC395933 PE=4 SV=1 - [F1NPD1_CHICK]	516.23	0.4679	8	11	12	70	312	36.1	5.87	0.0201373	0.953379
E1BRF0	Uncharacterized protein (Fragment) OS=Gallus gallus GN=LOC421560 PE=4 SV=2 - [E1BRF0_CHICK]	881.55	0.7395	7	20	21	172	311	36.2	6.27	0.158765	0.106833
E1BZT5	Uncharacterized protein OS=Gallus gallus GN=PRPF8 PE=4 SV=1 - [E1BZT5_CHICK]	362.58	0.0844	6	14	15	26	2335	273.5	8.82	-0.0899757	0.319109
E1BR38	Argininosuccinate synthase OS=Gallus gallus GN=ASS1 PE=2 SV=2 - [E1BR38_CHICK]	379.11	0.387	2	10	11	46	416	46.9	6.54	-0.20979	0.416398
F1NB92	Uncharacterized protein OS=Gallus gallus GN=ERAP1 PE=2 SV=2 - [F1NB92_CHICK]	290.41	0.1334	2	10	10	19	892	102.4	6.11	-0.0650754	0.627011
F1NQ78	Uncharacterized protein OS=Gallus gallus GN=MYLK PE=2 SV=1 - [F1NQ78_CHICK]	424.87	0.0992	5	13	13	17	1906	210.3	5.73	-0.0204091	0.724185
E1C7H6	Uncharacterized protein OS=Gallus gallus GN=SERPINF1 PE=3 SV=1 - [E1C7H6_CHICK]	98.48	0.0926	1	3	3	6	421	47.1	9.07	-0.053356	0.607827
R4GM34	Uncharacterized protein OS=Gallus gallus GN=LOC100857962 PE=4 SV=1 - [R4GM34_CHICK]	43.98	0.0457	1	1	1	1	219	23.8	9.39	-0.0316371	0.868147
R4GLP6	Uncharacterized protein (Fragment) OS=Gallus gallus GN=Gga.10533 PE=4 SV=1 - [R4GLP6_CHICK]	19.39	0.0003	1	1	1	1	30622	3397.7	6.33	0.112347	0.70744
E1BVP1	Uncharacterized protein (Fragment) OS=Gallus gallus GN=EIF5B PE=4 SV=2 - [E1BVP1_CHICK]	123.29	0.0662	1	6	6	9	1209	136.4	5.47	-0.00497536	0.940168
F1P0Q8	H/ACA ribonucleoprotein complex subunit 4 OS=Gallus gallus GN=DKC1 PE=4 SV=2 - [F1P0Q8_CHICK]	60.11	0.0814	2	3	3	4	516	58.1	9.28	-0.0375562	0.719532
E1BV78	Uncharacterized protein OS=Gallus gallus GN=FGG PE=4 SV=2 - [E1BV78_CHICK]	673.22	0.4612	2	19	19	101	438	49.9	5.73	-0.410893	0.214586
F1NFS0	Elongation factor 2 (Fragment) OS=Gallus gallus GN=EEF2 PE=4 SV=2 - [F1NFS0_CHICK]	1598.65	0.5158	5	40	40	250	857	95.2	6.83	0.0350311	0.271827
E1BY12	Uncharacterized protein OS=Gallus gallus GN=AP2B1 PE=2 SV=1 - [E1BY12_CHICK]	427.75	0.187	1	7	14	25	952	105.7	5.34	-0.0455603	0.479346
F1NCI1	Uncharacterized protein OS=Gallus gallus GN=AP1B1 PE=4 SV=2 - [F1NCI1_CHICK]	636.38	0.2492	1	12	19	38	955	104.7	5.1	0.115463	0.0422781
F1NXN3	Glycine amidinotransferase, mitochondrial OS=Gallus gallus GN=GATM PE=4 SV=2 - [F1NXN3_CHICK]	818.97	0.5355	2	19	19	113	422	48.3	8.02	0.0650324	0.583283
F1NTK1	Phosphoserine aminotransferase OS=Gallus gallus GN=PSAT1 PE=3 SV=2 - [F1NTK1_CHICK]	816.23	0.573	1	20	20	105	370	40.5	8.63	-0.098842	0.326959
E1C4J1	Uncharacterized protein OS=Gallus gallus GN=DPYD PE=4 SV=2 - [E1C4J1_CHICK]	288.95	0.1249	1	10	10	13	1025	111.3	6.4	0.0636224	0.289556
F1NHT3	Spectrin alpha chain, non-erythrocytic 1 OS=Gallus gallus GN=SPTAN1 PE=2 SV=2 - [F1NHT3_CHICK]	2640.63	0.3876	3	73	73	179	2477	285.2	5.33	-0.0669001	0.192693
Q5ZKZ8	Uncharacterized protein OS=Gallus gallus GN=SNTB1 PE=2 SV=1 - [Q5ZKZ8_CHICK]	111.91	0.0994	2	5	5	10	523	56.7	8.25	0.0117307	0.821412
F1NHR3	Uncharacterized protein OS=Gallus gallus GN=GVINP1 PE=4 SV=2 - [F1NHR3_CHICK]	39.93	0.0111	1	2	2	2	2435	278.8	6.64	-0.0361557	0.808149
F1NIQ9	Uncharacterized protein (Fragment) OS=Gallus gallus GN=PEPD PE=3 SV=2 - [F1NIQ9_CHICK]	421.21	0.2877	3	12	12	20	497	55.3	6.7	-0.0447308	0.545098
E1C458	CTP synthase OS=Gallus gallus GN=CTPS PE=3 SV=2 - [E1C458_CHICK]	115.24	0.0905	2	4	5	5	619	69.7	7.39	-0.0239297	0.765117
F1NCS3	Uncharacterized protein (Fragment) OS=Gallus gallus GN=NAAA PE=4 SV=2 - [F1NCS3_CHICK]	22.46	0.022	1	1	1	1	364	40.4	7.34	-0.15799	0.12285
F1NIB1	Uncharacterized protein (Fragment) OS=Gallus gallus GN=RAP1GDS1 PE=4 SV=2 - [F1NIB1_CHICK]	95.51	0.0413	5	2	2	4	606	66.1	5.4	-0.0537079	0.700322
Q5ZKR9	Uncharacterized protein OS=Gallus gallus GN=RCJMB04_9i5 PE=2 SV=1 - [Q5ZKR9_CHICK]	441.21	0.7222	2	7	10	53	180	20.5	5.68	0.0123715	0.926467
E1C155	Uncharacterized protein OS=Gallus gallus GN=ALDH6A1 PE=3 SV=1 - [E1C155_CHICK]	995.52	0.5539	3	23	23	134	538	58.3	8.19	-0.0261506	0.496801
F1ND51	Uncharacterized protein OS=Gallus gallus GN=SPTBN1 PE=4 SV=2 - [F1ND51_CHICK]	1816.39	0.2835	2	50	51	108	2349	272.2	5.6	0.027323	0.502072
F1NNR3	Annexin OS=Gallus gallus GN=ANXA13 PE=3 SV=2 - [F1NNR3_CHICK]	71.08	0.0536	2	3	3	3	317	35.3	6.47	-0.292121	0.040461
F1NH87	Glyceraldehyde-3-phosphate dehydrogenase (Fragment) OS=Gallus gallus GN=GAPDH PE=2 SV=1 - [F1NH87_CHICK]	920.57	0.64	2	15	18	707	325	34.9	8.35	0.137142	0.263546
H9L0J1	Uncharacterized protein OS=Gallus gallus GN=RETSAT PE=4 SV=2 - [H9L0J1_CHICK]	538.95	0.323	1	13	13	29	613	67.9	9.22	0.33706	0.0934763
F1NM59	Uncharacterized protein OS=Gallus gallus GN=RBM27 PE=4 SV=2 - [F1NM59_CHICK]	30.07	0.008	1	1	1	1	1006	113	8.94	#NUM!	#NUM!
F1NBC2	Uncharacterized protein (Fragment) OS=Gallus gallus GN=AADACL2 PE=4 SV=2 - [F1NBC2_CHICK]	677.11	0.5369	1	15	15	72	406	44.9	7.2	-0.0423419	0.737765
R4GH50	Uncharacterized protein OS=Gallus gallus GN=LOC100858280 PE=4 SV=1 - [R4GH50_CHICK]	141.47	0.2569	1	4	4	9	144	16.4	8.43	-0.0281329	0.519523
F1NPA9	Uncharacterized protein OS=Gallus gallus GN=RPS3 PE=2 SV=2 - [F1NPA9_CHICK]	631.11	0.6914	3	16	16	89	243	26.7	9.66	0.02897	0.7821
F1NJV0	Uncharacterized protein OS=Gallus gallus PE=4 SV=2 - [F1NJV0_CHICK]	479.27	0.3663	1	13	13	46	445	50.2	8.62	0.0100016	0.888299
E1BZ74	Uncharacterized protein OS=Gallus gallus GN=AFG3L2 PE=3 SV=2 - [E1BZ74_CHICK]	198.13	0.0969	1	7	7	15	805	89.2	8.79	0.0626	0.373144
F1NPF0	Eukaryotic translation initiation factor 2 subunit 3 OS=Gallus gallus GN=EIF2S3 PE=4 SV=1 - [F1NPF0_CHICK]	240.64	0.2394	2	8	8	14	472	51.1	8.27	0.056461	0.0273451
E1BQU4	Uncharacterized protein OS=Gallus gallus GN=NSF PE=4 SV=2 - [E1BQU4_CHICK]	125.46	0.0608	1	4	4	4	740	82.1	6.81	-0.0479043	0.545382
F1NZJ2	Uncharacterized protein OS=Gallus gallus GN=HK1 PE=3 SV=2 - [F1NZJ2_CHICK]	206.25	0.0731	3	1	6	12	917	102.7	6.74	-0.0984702	0.50838
E1BRU7	Uncharacterized protein OS=Gallus gallus GN=HKDC1 PE=3 SV=1 - [E1BRU7_CHICK]	594.98	0.2028	1	11	14	26	917	102.1	7.81	-0.0353598	0.859637
F1NT24	Uncharacterized protein (Fragment) OS=Gallus gallus GN=RPE PE=4 SV=2 - [F1NT24_CHICK]	60.59	0.2256	1	3	3	3	164	17.8	5.54	-0.165179	0.0638304
F1NW43	Pyruvate kinase OS=Gallus gallus GN=PKM2 PE=3 SV=2 - [F1NW43_CHICK]	544.62	0.3792	2	15	15	47	530	57.8	7.87	-0.0542504	0.120564
E1C0M6	Uncharacterized protein OS=Gallus gallus GN=UPF2 PE=4 SV=2 - [E1C0M6_CHICK]	34.56	0.0077	1	1	1	1	1293	149.7	5.71	-0.0412273	0.675754
R4GK54	Uncharacterized protein (Fragment) OS=Gallus gallus GN=RRAGD PE=4 SV=1 - [R4GK54_CHICK]	34.3	0.0199	2	1	1	1	351	40.5	6.11	#NUM!	#NUM!
Q5ZL53	Uncharacterized protein OS=Gallus gallus GN=RCJMB04_7l20 PE=2 SV=1 - [Q5ZL53_CHICK]	698.54	0.3265	4	21	21	70	637	70.9	9.51	0.0917071	0.329995
F1NZE9	Cytochrome P450 2H1 OS=Gallus gallus GN=CYP2H1 PE=3 SV=1 - [F1NZE9_CHICK]	696.08	0.4542	5	11	20	74	491	56.2	6.9	0.342217	0.227394
F1NVA1	Uncharacterized protein OS=Gallus gallus GN=ACSM3 PE=4 SV=2 - [F1NVA1_CHICK]	245.99	0.2543	1	9	9	17	578	64.8	8.43	0.0283944	0.693844
F1NW23	Clathrin heavy chain (Fragment) OS=Gallus gallus GN=CLTC PE=3 SV=1 - [F1NW23_CHICK]	2264.59	0.4705	7	36	55	177	1662	189.9	5.72	-0.0170323	0.901774
F1NAW4	Uncharacterized protein OS=Gallus gallus GN=MAOB PE=4 SV=2 - [F1NAW4_CHICK]	393.22	0.2956	2	12	12	37	521	58.5	8.35	0.0766477	0.458832
F1P0W8	Uncharacterized protein OS=Gallus gallus GN=GPD1L PE=3 SV=2 - [F1P0W8_CHICK]	157.18	0.1671	1	2	4	27	353	38.6	6.95	-0.00866171	0.944663
F1NFY2	Uncharacterized protein OS=Gallus gallus GN=GPD1 PE=3 SV=2 - [F1NFY2_CHICK]	1076.7	0.7507	1	19	22	192	349	38.4	6.67	0.0255908	0.823606
E1BTT4	Uncharacterized protein OS=Gallus gallus GN=HADHB PE=3 SV=1 - [E1BTT4_CHICK]	1068.86	0.6477	1	23	23	208	474	50.8	9.32	0.00390199	0.946977
F1P2M6	Uncharacterized protein OS=Gallus gallus GN=C4BPA PE=4 SV=1 - [F1P2M6_CHICK]	73.56	0.0926	2	4	4	6	713	79.4	6.65	-0.128111	0.573143
R4GIK2	Uncharacterized protein OS=Gallus gallus GN=GAMT PE=4 SV=1 - [R4GIK2_CHICK]	297.19	0.417	1	6	6	77	223	24.6	5.15	0.193451	0.0107523
Q5F411	Uncharacterized protein OS=Gallus gallus GN=CCT5 PE=2 SV=1 - [Q5F411_CHICK]	731.02	0.5157	1	20	21	64	541	59.7	5.74	-0.00953384	0.840422
E1C958	Uncharacterized protein OS=Gallus gallus GN=LGMN PE=4 SV=1 - [E1C958_CHICK]	158.96	0.2111	1	6	6	11	431	49.2	6.39	0.174956	0.0216753
Q5ZJ59	Uncharacterized protein OS=Gallus gallus GN=RCJMB04_20j14 PE=2 SV=1 - [Q5ZJ59_CHICK]	142.69	0.1351	4	4	5	7	348	40.1	11.53	-0.0451859	0.73329
E1C959	Uncharacterized protein OS=Gallus gallus PE=4 SV=2 - [E1C959_CHICK]	38.06	0.0261	1	1	1	1	536	59.9	7.62	0.187496	0.0592201
F1NW39	Uncharacterized protein (Fragment) OS=Gallus gallus GN=ACOT13 PE=4 SV=2 - [F1NW39_CHICK]	260.91	0.4967	1	6	6	34	153	16.4	9.26	-0.214376	0.105193
O93417	Caspase-3 OS=Gallus gallus GN=CASP3 PE=2 SV=1 - [O93417_CHICK]	260.3	0.2968	2	8	8	10	283	31.7	6.87	-0.0497701	0.645022
F1NZ24	Uncharacterized protein OS=Gallus gallus GN=SLC25A3 PE=3 SV=2 - [F1NZ24_CHICK]	442.24	0.4022	2	12	12	59	358	40	9.32	-0.00870571	0.93824
E1C1T9	Uncharacterized protein OS=Gallus gallus GN=EHHADH PE=3 SV=2 - [E1C1T9_CHICK]	1708.83	0.6474	1	38	38	275	726	79.6	9.11	0.134177	0.0728872
E1BU27	Uncharacterized protein (Fragment) OS=Gallus gallus GN=AKR1D1 PE=4 SV=2 - [E1BU27_CHICK]	699.68	0.7248	1	21	21	119	327	37.4	6.79	0.0125661	0.940583
F1N9H3	Protein disulfide-isomerase OS=Gallus gallus GN=P4HB PE=3 SV=2 - [F1N9H3_CHICK]	1378.97	0.6267	4	29	29	336	501	55.8	4.88	-0.0163401	0.857182
F1NP98	Uncharacterized protein OS=Gallus gallus GN=ILK PE=2 SV=2 - [F1NP98_CHICK]	95.75	0.0623	2	3	3	3	401	45.7	9.1	-0.0100641	0.79663
H9KZN0	Uncharacterized protein (Fragment) OS=Gallus gallus PE=4 SV=2 - [H9KZN0_CHICK]	840.11	0.7346	1	2	16	366	260	28.3	9.03	-0.0177588	0.690357
F1NHT7	Uncharacterized protein OS=Gallus gallus GN=CTNNB1 PE=4 SV=1 - [F1NHT7_CHICK]	680.54	0.3086	3	17	17	33	781	85.4	5.86	0.0530141	0.0939431
F1NYN2	Uncharacterized protein OS=Gallus gallus GN=PDK4 PE=4 SV=2 - [F1NYN2_CHICK]	133.65	0.1643	1	5	6	6	414	46.9	7.99	-0.113427	0.210004
E1BWI3	Uncharacterized protein OS=Gallus gallus GN=RSU1 PE=2 SV=2 - [E1BWI3_CHICK]	179.06	0.2924	1	6	6	9	277	31.5	8.48	0.00310728	0.970677
F1NI22	ATP synthase subunit alpha OS=Gallus gallus GN=ATP5A1 PE=2 SV=1 - [F1NI22_CHICK]	1916.62	0.6546	9	33	33	606	553	59.9	9.13	0.0438859	0.20497
F1P4P8	Uncharacterized protein OS=Gallus gallus GN=PSMD2 PE=4 SV=2 - [F1P4P8_CHICK]	288.52	0.1551	4	9	9	21	851	94	5.47	-0.01595	0.721385
F1NR99	Uncharacterized protein OS=Gallus gallus GN=CPOX PE=4 SV=2 - [F1NR99_CHICK]	308.31	0.3738	1	10	10	15	404	45.4	8.32	-0.013491	0.876319
F1N8Y3	Uncharacterized protein OS=Gallus gallus GN=CBR1 PE=3 SV=1 - [F1N8Y3_CHICK]	396.02	0.5399	3	10	10	44	276	30.3	8.05	0.1582	0.367742
F1P2F0	Collagen alpha-3(VI) chain OS=Gallus gallus GN=COL6A3 PE=4 SV=1 - [F1P2F0_CHICK]	1906.22	0.1925	2	45	45	190	3137	339.4	6.68	-0.22528	0.140061
A3R0S3	Growth factor receptor-bound protein 2 OS=Gallus gallus GN=GRB2 PE=2 SV=1 - [A3R0S3_CHICK]	59.59	0.1797	2	2	2	2	217	25.2	6.15	-0.0745493	0.588622
E1C2F9	Uncharacterized protein OS=Gallus gallus PE=4 SV=2 - [E1C2F9_CHICK]	1587.54	0.3695	1	41	44	124	1575	181	6.34	0.0306436	0.406516
F1P5X5	Uncharacterized protein (Fragment) OS=Gallus gallus GN=RCC2 PE=4 SV=2 - [F1P5X5_CHICK]	136.92	0.0749	2	3	3	4	454	49.3	8.35	-0.347927	0.0963725
F1NAR5	Uncharacterized protein OS=Gallus gallus GN=SERPINF2 PE=3 SV=2 - [F1NAR5_CHICK]	44.06	0.0456	1	2	2	2	461	51.5	5.77	-0.147215	0.175453
R4GG07	Uncharacterized protein OS=Gallus gallus GN=LOC100857808 PE=3 SV=1 - [R4GG07_CHICK]	315.15	0.627	1	3	6	28	126	13.2	7.43	-0.0252782	0.802038
H9L135	Uncharacterized protein OS=Gallus gallus GN=HSD17B10 PE=3 SV=2 - [H9L135_CHICK]	534.98	0.6653	1	7	10	74	236	24.3	9.41	0.0750449	0.34386
F1P531	Uncharacterized protein OS=Gallus gallus GN=MCCC2 PE=4 SV=2 - [F1P531_CHICK]	408.01	0.2874	1	9	9	16	515	55.8	7.24	0.0195327	0.738312
E1BS67	Serine hydroxymethyltransferase (Fragment) OS=Gallus gallus GN=SHMT1 PE=3 SV=2 - [E1BS67_CHICK]	714.21	0.4417	1	17	17	111	532	58.2	8.57	0.0297511	0.767068
R4GGS2	Uncharacterized protein OS=Gallus gallus GN=C4 PE=4 SV=1 - [R4GGS2_CHICK]	718.49	0.1995	5	20	20	39	1664	178.6	7.37	-0.0175081	0.821949
F1NWI3	Uncharacterized protein OS=Gallus gallus GN=SLC25A13 PE=3 SV=2 - [F1NWI3_CHICK]	1167.26	0.5701	4	27	27	178	642	70.4	8.63	-0.0608553	0.573914
H9L3L2	Uncharacterized protein OS=Gallus gallus GN=LOC100859596 PE=4 SV=2 - [H9L3L2_CHICK]	592.94	0.2206	2	22	22	49	1224	138.4	7.59	-0.027407	0.680556
R4GF79	Uncharacterized protein OS=Gallus gallus GN=IMPA1 PE=4 SV=1 - [R4GF79_CHICK]	125.83	0.1527	1	5	5	11	334	36.7	7.06	0.0516259	0.483903
F1NRT5	Uncharacterized protein OS=Gallus gallus GN=ACP6 PE=4 SV=2 - [F1NRT5_CHICK]	48.95	0.0434	1	2	2	3	415	46.8	8.07	-0.0802141	0.483467
E1BS37	Uncharacterized protein OS=Gallus gallus GN=HSD17B11 PE=3 SV=1 - [E1BS37_CHICK]	732.49	0.612	2	15	15	89	299	32.6	8.31	0.0413183	0.800129
F1NZ68	Uncharacterized protein OS=Gallus gallus GN=GBAS PE=4 SV=1 - [F1NZ68_CHICK]	112.8	0.2535	2	6	6	10	284	33.2	9.26	-0.00852279	0.936225
Q5U784	Aminoimidazole-4-carboxamide ribonucleotidetransformylase/IMP cyclohydrolase OS=Gallus gallus GN=PURH PE=2 SV=1 - [Q5U784_CHICK]	1722.39	0.7521	7	33	33	515	593	64.3	8.18	0.175514	0.041049
F1NUS2	Uncharacterized protein OS=Gallus gallus GN=PREP PE=4 SV=1 - [F1NUS2_CHICK]	573.77	0.3268	2	18	18	38	710	80.8	6.06	0.0694304	0.099643
H9KZF8	ATP synthase subunit gamma OS=Gallus gallus GN=ATP5C1 PE=3 SV=2 - [H9KZF8_CHICK]	606.88	0.5816	1	12	12	111	294	32.7	9.44	-0.019821	0.878563
F1P4C1	Uncharacterized protein OS=Gallus gallus GN=C7H2orf47 PE=4 SV=2 - [F1P4C1_CHICK]	131.12	0.1371	1	3	3	5	248	27.9	8.32	-0.0820038	0.635555
Q6PKI8	Phenylalanine hydroxylase OS=Gallus gallus GN=PAH PE=2 SV=1 - [Q6PKI8_CHICK]	719.58	0.6166	2	23	23	95	446	51.1	6.95	0.160742	0.0266262
E1BU22	Uncharacterized protein OS=Gallus gallus GN=GAA PE=4 SV=2 - [E1BU22_CHICK]	391.86	0.1376	1	11	11	23	930	104.6	6.28	0.190486	0.0646918
E1BWG0	Fatty acid synthase OS=Gallus gallus GN=FASN PE=4 SV=2 - [E1BWG0_CHICK]	4202.58	0.5939	2	7	98	892	2512	274.6	6.34	0.0816182	0.514419
A1IMF0	Ubiquitin carboxyl-terminal hydrolase isozyme L1 OS=Gallus gallus GN=UCH-L1 PE=2 SV=1 - [A1IMF0_CHICK]	123.08	0.1652	1	4	4	6	224	25.1	6.07	-0.389203	0.116105
F1NAK4	Uncharacterized protein (Fragment) OS=Gallus gallus GN=GCN1L1 PE=4 SV=2 - [F1NAK4_CHICK]	460.18	0.0812	1	16	16	20	2673	293.6	7.31	-0.00297051	0.955038
Q58I02	Uncharacterized protein OS=Gallus gallus GN=PBEF1 PE=2 SV=1 - [Q58I02_CHICK]	303.03	0.2617	3	10	10	22	493	55.6	7.12	-0.0876073	0.420645
E1BZS8	Uncharacterized protein OS=Gallus gallus GN=TXNL1 PE=4 SV=1 - [E1BZS8_CHICK]	198.44	0.308	1	6	6	14	289	32.3	5.07	0.0340331	0.622224
Q5F4B9	Uncharacterized protein OS=Gallus gallus GN=ABCD3 PE=2 SV=1 - [Q5F4B9_CHICK]	361.36	0.2	1	10	10	27	660	75.5	9.33	0.0400711	0.71736
E1C7F4	Uncharacterized protein OS=Gallus gallus GN=LOC421447 PE=4 SV=1 - [E1C7F4_CHICK]	1081.84	0.6173	1	24	24	248	486	55.6	8.9	-0.0319845	0.605388
F1NBJ7	Uncharacterized protein OS=Gallus gallus GN=SARDH PE=3 SV=2 - [F1NBJ7_CHICK]	1260.41	0.5542	1	35	35	110	913	101	6.89	0.00832802	0.916401
F1P4I0	Uncharacterized protein OS=Gallus gallus GN=CRYZ PE=4 SV=1 - [F1P4I0_CHICK]	605.17	0.6224	2	12	12	66	331	35.3	7.87	0.195071	0.0454076
B3Y932	APEX nuclease OS=Gallus gallus GN=chApex1 PE=2 SV=1 - [B3Y932_CHICK]	199.24	0.2767	1	6	6	19	300	33.4	8.31	-0.0330823	0.799391
F1NG68	Uncharacterized protein (Fragment) OS=Gallus gallus GN=LOC100858408 PE=4 SV=2 - [F1NG68_CHICK]	155.25	0.1759	1	4	4	16	307	32.7	9.23	0.126483	0.179472
Q5ZKQ2	Uncharacterized protein OS=Gallus gallus GN=QDPR PE=2 SV=1 - [Q5ZKQ2_CHICK]	355.23	0.4076	1	6	6	37	238	24.9	6.9	0.121526	0.0290613
F1NPF3	Uncharacterized protein (Fragment) OS=Gallus gallus GN=NDUFB9 PE=4 SV=2 - [F1NPF3_CHICK]	98.88	0.1788	1	3	3	7	179	21.9	8.84	-0.079238	0.377761
E1BZJ3	Uncharacterized protein OS=Gallus gallus GN=NPLOC4 PE=4 SV=2 - [E1BZJ3_CHICK]	168.95	0.087	1	5	5	5	609	68.4	6.38	0.0541191	0.108379
F1NW95	Uncharacterized protein OS=Gallus gallus GN=NDUFA12 PE=4 SV=2 - [F1NW95_CHICK]	260.36	0.6027	2	7	7	19	146	16.9	9.76	0.0203781	0.708796
Q5ZJ29	Uncharacterized protein OS=Gallus gallus GN=RCJMB04_21f9 PE=2 SV=1 - [Q5ZJ29_CHICK]	142.55	0.1298	2	4	4	7	439	48.3	7.44	-0.208469	0.0616567
E1C7Y3	Uncharacterized protein OS=Gallus gallus GN=PHGDH PE=3 SV=2 - [E1C7Y3_CHICK]	1454.27	0.68	1	27	27	283	525	54.9	8.09	0.203097	0.0900424
F1NPI6	Uncharacterized protein OS=Gallus gallus GN=UBA6 PE=4 SV=2 - [F1NPI6_CHICK]	30.05	0.0206	1	1	1	2	1021	115	6.18	0.00990238	0.92439
F1P1R3	Uncharacterized protein (Fragment) OS=Gallus gallus GN=PSMD10 PE=4 SV=2 - [F1P1R3_CHICK]	46.34	0.0306	1	1	1	1	229	24.2	5.88	#NUM!	#NUM!
F1P0M2	Uncharacterized protein OS=Gallus gallus GN=PCCA PE=4 SV=2 - [F1P0M2_CHICK]	705.51	0.3633	1	20	20	45	713	78.5	7.77	-0.057322	0.118912
F1NX32	Glycine dehydrogenase (decarboxylating), mitochondrial OS=Gallus gallus GN=GLDC PE=3 SV=2 - [F1NX32_CHICK]	612.56	0.2742	2	21	21	46	1127	124	8.41	-0.0274281	0.79576
F1NXH1	Uncharacterized protein (Fragment) OS=Gallus gallus GN=MARC2 PE=4 SV=1 - [F1NXH1_CHICK]	562.49	0.4914	1	17	17	85	348	38.7	8.92	-0.0283482	0.554524
Q90892	Guanylate binding protein OS=Gallus gallus GN=GBP PE=2 SV=2 - [Q90892_CHICK]	169.27	0.1233	2	6	6	11	576	66	6.67	-0.139014	0.507962
E1BUS2	Uncharacterized protein OS=Gallus gallus GN=NOP58 PE=4 SV=2 - [E1BUS2_CHICK]	26.2	0.031	1	1	1	2	549	61.6	8.68	0.319657	0.0424889
F1NG39	Unconventional myosin-Ic OS=Gallus gallus GN=MYO1C PE=2 SV=1 - [F1NG39_CHICK]	305.38	0.1294	2	10	10	18	1028	118.8	9.16	-0.0256987	0.499078
F1NDP5	Sulfurtransferase OS=Gallus gallus GN=TST PE=4 SV=2 - [F1NDP5_CHICK]	482.03	0.6088	1	7	14	95	294	32.9	7.58	-0.0267577	0.540023
Q6EE32	Calreticulin (Fragment) OS=Gallus gallus PE=2 SV=1 - [Q6EE32_CHICK]	777.19	0.5767	2	22	22	185	404	46.9	4.55	0.0113071	0.851245
Q98TF9	Ribosomal protein L14 (Fragment) OS=Gallus gallus GN=RPL14 PE=2 SV=1 - [Q98TF9_CHICK]	110.21	0.1527	2	2	2	13	131	15.5	10.55	0.0950931	0.798144
Q9W6J2	Glutathione S-transferase OS=Gallus gallus GN=GSTA3 PE=2 SV=1 - [Q9W6J2_CHICK]	526.34	0.6457	1	11	13	68	223	25.4	8.84	-0.0206041	0.874613
F1P179	Uncharacterized protein OS=Gallus gallus GN=EPRS PE=3 SV=1 - [F1P179_CHICK]	766.34	0.1949	5	23	24	64	1601	179.8	7.74	0.0447013	0.123915
F1P180	Aspartate aminotransferase OS=Gallus gallus GN=GOT2 PE=3 SV=2 - [F1P180_CHICK]	1145.9	0.6336	2	26	26	270	423	47.3	9.33	0.0178875	0.741065
E1C378	Uncharacterized protein OS=Gallus gallus GN=HNMT PE=4 SV=1 - [E1C378_CHICK]	474.1	0.4521	1	12	12	92	292	32.9	5.83	0.258127	0.00850157
E1C757	Uncharacterized protein OS=Gallus gallus GN=ABCB11 PE=3 SV=2 - [E1C757_CHICK]	612.2	0.1475	2	15	15	28	1349	148.5	8.47	0.116423	0.183557
F1NPD3	60S ribosomal protein L18a (Fragment) OS=Gallus gallus GN=RPL18A PE=3 SV=2 - [F1NPD3_CHICK]	118.95	0.2123	1	4	4	6	179	21.2	10.81	0.140852	0.622059
F1NC27	Uncharacterized protein (Fragment) OS=Gallus gallus GN=RAB21 PE=3 SV=1 - [F1NC27_CHICK]	99.61	0.1491	1	3	3	5	228	24.7	8.16	-0.0484165	0.584886
E1BVT3	Malate dehydrogenase OS=Gallus gallus GN=MDH2 PE=3 SV=1 - [E1BVT3_CHICK]	1060.94	0.7537	1	19	19	312	337	35.6	8.56	0.0664383	0.454718
E1C004	Uncharacterized protein (Fragment) OS=Gallus gallus GN=CA4 PE=4 SV=2 - [E1C004_CHICK]	25.3	0.0272	1	1	1	2	331	37.9	7.31	0.641686	0.024498
F1NBV0	Peroxiredoxin-6 OS=Gallus gallus GN=PRDX6 PE=2 SV=1 - [F1NBV0_CHICK]	692.09	0.7054	2	16	16	185	224	25.1	6.38	0.202418	0.290549
F2Z4L6	Serum albumin OS=Gallus gallus GN=ALB PE=4 SV=2 - [F2Z4L6_CHICK]	1905.27	0.8442	1	2	43	982	565	64	5.45	-0.0575367	0.711024
O42283	Heat shock protein 10 OS=Gallus gallus PE=3 SV=1 - [O42283_CHICK]	283.56	0.6275	3	7	7	131	102	11.1	8.63	0.122351	0.491221
F1NEF2	T-complex protein 1 subunit theta OS=Gallus gallus GN=CCT8 PE=3 SV=2 - [F1NEF2_CHICK]	617.12	0.4335	1	1	20	39	549	59.5	5.6	-0.028502	0.72428
D0VX31	Mitochondrial ubiquinol-cytochrome-c reductase complex core protein i OS=Gallus gallus PE=1 SV=1 - [D0VX31_CHICK]	974.52	0.5426	2	21	21	110	446	49.4	6.38	0.00823832	0.693057
E1BYW5	Uncharacterized protein OS=Gallus gallus GN=CYP4V2 PE=3 SV=1 - [E1BYW5_CHICK]	142.39	0.1377	1	7	7	12	530	61.5	6.64	0.054206	0.635312
O42483	Alcohol dehydrogenase ADH-F OS=Gallus gallus PE=2 SV=1 - [O42483_CHICK]	857.45	0.5372	1	1	17	288	376	40	7.68	0.0449562	0.908955
F1NTZ0	Uncharacterized protein (Fragment) OS=Gallus gallus GN=ADH6 PE=3 SV=2 - [F1NTZ0_CHICK]	891.23	0.5499	1	1	17	313	371	39.5	7.49	0.0140127	0.933855
F1NH05	Uncharacterized protein OS=Gallus gallus GN=Gga.54520 PE=4 SV=2 - [F1NH05_CHICK]	94.75	0.0254	1	4	4	5	1496	167.1	6.9	-0.0974661	0.352583
Q5ZJZ2	Uncharacterized protein OS=Gallus gallus GN=RPL3 PE=2 SV=1 - [Q5ZJZ2_CHICK]	320.25	0.3275	2	13	13	18	403	46.1	10.2	0.115813	0.585627
R4GMC7	Uncharacterized protein OS=Gallus gallus PE=3 SV=1 - [R4GMC7_CHICK]	151.5	0.1573	1	7	7	15	585	64.8	9.09	-0.0152051	0.787377
F1N970	Uncharacterized protein (Fragment) OS=Gallus gallus PE=3 SV=2 - [F1N970_CHICK]	63.62	0.0653	1	2	2	2	337	36.3	9.66	0.078566	0.223494
Q5ZJ68	Uncharacterized protein OS=Gallus gallus GN=RCJMB04_20f2 PE=2 SV=1 - [Q5ZJ68_CHICK]	1649.72	0.7459	1	1	39	278	614	67.6	7.87	-0.29139	0.0189491
F1NEF6	Uncharacterized protein (Fragment) OS=Gallus gallus GN=ACAD9 PE=3 SV=2 - [F1NEF6_CHICK]	1678.78	0.7435	1	1	39	280	616	67.8	7.46	-0.254375	0.0610592
H9KYZ6	Uncharacterized protein OS=Gallus gallus GN=LOC426743 PE=4 SV=2 - [H9KYZ6_CHICK]	175.47	0.1352	1	6	6	7	710	77.8	7.42	0.0857433	0.338082
F1NCU5	Uncharacterized protein OS=Gallus gallus GN=KIAA0368 PE=4 SV=2 - [F1NCU5_CHICK]	108.13	0.0352	1	4	4	4	1844	203.9	7.25	-0.0736387	0.230009
R4GKA9	Uncharacterized protein (Fragment) OS=Gallus gallus GN=AIF1L PE=4 SV=1 - [R4GKA9_CHICK]	103.12	0.3333	1	4	4	6	147	16.5	5.72	-0.0190162	0.869272
Q71SG3	Collapsin response mediator protein-1B OS=Gallus gallus GN=CRMP1B PE=2 SV=1 - [Q71SG3_CHICK]	70.51	0.0664	3	1	3	8	572	62.4	7.06	-0.0180968	0.873893
F1NS48	Uncharacterized protein OS=Gallus gallus GN=DPYSL3 PE=2 SV=2 - [F1NS48_CHICK]	157.29	0.0918	3	3	4	8	534	57.9	6.48	0.101588	0.187683
Q71SG1	Collapsin response mediator protein-2B OS=Gallus gallus GN=CRMP2B PE=2 SV=1 - [Q71SG1_CHICK]	227.02	0.2133	3	6	8	16	572	62.2	6.49	0.0223583	0.635279
Q5ZJ22	Uncharacterized protein OS=Gallus gallus GN=GMFB PE=2 SV=1 - [Q5ZJ22_CHICK]	102.32	0.3099	1	3	3	4	142	16.7	5.27	0.0333061	0.837368
E1BX85	Uncharacterized protein OS=Gallus gallus GN=GSTO1 PE=3 SV=1 - [E1BX85_CHICK]	443.04	0.6025	1	14	14	26	239	27.2	7.44	0.0135639	0.786772
F1NLQ2	Uncharacterized protein OS=Gallus gallus GN=CMAS PE=4 SV=2 - [F1NLQ2_CHICK]	74.66	0.0507	1	2	2	2	414	46.2	6.84	#NUM!	#NUM!
R9PXN7	Hematopoietic prostaglandin D synthase OS=Gallus gallus GN=HPGDS PE=3 SV=1 - [R9PXN7_CHICK]	418.89	0.5354	3	12	12	75	198	22.6	7.28	0.265391	0.14373
E1BZR1	Uncharacterized protein OS=Gallus gallus GN=HNRNPR PE=4 SV=2 - [E1BZR1_CHICK]	547.83	0.3286	2	15	17	34	633	71	8.28	0.00268993	0.976478
F1NZU2	Uncharacterized protein OS=Gallus gallus GN=SYNCRIP PE=4 SV=2 - [F1NZU2_CHICK]	323.38	0.2366	2	8	10	15	448	49.7	7.23	0.0662393	0.408491
F1N9F8	Alcohol dehydrogenase [NADP(+)] OS=Gallus gallus GN=AKR1A1 PE=2 SV=1 - [F1N9F8_CHICK]	447.94	0.5229	2	14	15	65	327	37.1	7.8	0.10991	0.157151
Q5ZMQ1	Uncharacterized protein OS=Gallus gallus GN=RCJMB04_1h14 PE=2 SV=1 - [Q5ZMQ1_CHICK]	63.73	0.0321	2	2	2	2	1029	116	6.52	-0.079026	0.301669
E1AFU7	Gallinacin-2 (Fragment) OS=Gallus gallus PE=4 SV=1 - [E1AFU7_CHICK]	23.79	0.2286	3	1	1	3	35	3.8	8.54	#NUM!	#NUM!
H9L1A3	Uncharacterized protein OS=Gallus gallus GN=LOC100859076 PE=4 SV=2 - [H9L1A3_CHICK]	159.76	0.2757	1	7	7	9	243	27.6	6.54	-0.0801621	0.351807
E1BW50	Uncharacterized protein OS=Gallus gallus GN=CTNNBL1 PE=4 SV=2 - [E1BW50_CHICK]	92.03	0.0533	2	3	3	4	563	65.1	4.98	-0.00838723	0.958276
H9L0M7	Uncharacterized protein OS=Gallus gallus PE=4 SV=1 - [H9L0M7_CHICK]	23.68	0.0142	1	1	1	1	563	61	6.67	#NUM!	#NUM!
F1NP23	Uncharacterized protein OS=Gallus gallus GN=NID1 PE=4 SV=2 - [F1NP23_CHICK]	266.99	0.0927	2	9	9	15	1251	136.5	5.25	-0.104226	0.407291
Q5ZKJ9	Uncharacterized protein OS=Gallus gallus GN=ATP6V1E1 PE=2 SV=1 - [Q5ZKJ9_CHICK]	148.37	0.1593	1	3	3	7	226	26.1	8.02	0.0435396	0.564778
F1P269	Uncharacterized protein OS=Gallus gallus GN=ACLY PE=4 SV=2 - [F1P269_CHICK]	2412.49	0.6049	3	57	57	549	1091	120.1	7.62	-0.168378	0.274843
F6UK13	Uncharacterized protein OS=Gallus gallus GN=LOC100859438 PE=4 SV=1 - [F6UK13_CHICK]	79.05	0.2191	4	4	4	4	251	29.6	9.36	0.00377286	0.950684
Q5F3C0	Uncharacterized protein OS=Gallus gallus GN=RCJMB04_22h1 PE=2 SV=1 - [Q5F3C0_CHICK]	463.62	0.2308	2	14	14	27	780	87.8	6.8	0.102092	0.0710292
Q789A6	Nonmuscle myosin heavy chain OS=Gallus gallus GN=MYH10 PE=2 SV=1 - [Q789A6_CHICK]	3045.08	0.4545	6	60	81	284	1976	228.9	5.5	0.0266099	0.812878
F1NDD4	Uncharacterized protein OS=Gallus gallus GN=LOC421212 PE=4 SV=2 - [F1NDD4_CHICK]	78.26	0.1897	1	2	2	3	174	19.3	6.6	0.0495958	0.294063
F1NLG5	Uncharacterized protein (Fragment) OS=Gallus gallus GN=SFXN1 PE=2 SV=2 - [F1NLG5_CHICK]	353.36	0.3415	1	7	8	23	325	36	9.22	0.174372	0.0985162
F1NV15	Uncharacterized protein OS=Gallus gallus GN=SFXN3 PE=4 SV=2 - [F1NV15_CHICK]	46.85	0.0839	1	1	2	3	322	35.4	9.44	-0.15624	0.402099
E1C8D8	Sulfurtransferase OS=Gallus gallus GN=MPST PE=4 SV=2 - [E1C8D8_CHICK]	400.3	0.4781	2	10	10	57	297	33.2	6.19	0.0695684	0.514156
Q5ZMC1	Uncharacterized protein OS=Gallus gallus GN=DDX19B PE=2 SV=1 - [Q5ZMC1_CHICK]	103.61	0.0689	3	2	2	3	479	53.9	6.15	-0.152331	0.0343409
Q5ZJ57	Uncharacterized protein OS=Gallus gallus GN=RCJMB04_20j17 PE=2 SV=1 - [Q5ZJ57_CHICK]	879.45	0.4299	2	21	21	94	728	79.5	6.92	-0.0321454	0.377761
F1NPT0	Uncharacterized protein OS=Gallus gallus GN=DNM1L PE=2 SV=1 - [F1NPT0_CHICK]	331.35	0.1437	3	7	7	15	696	77.6	6.61	-0.0222391	0.772992
F1N9S2	Uncharacterized protein (Fragment) OS=Gallus gallus GN=GSTZ1 PE=3 SV=2 - [F1N9S2_CHICK]	491.88	0.6489	1	9	9	115	225	25	8.73	0.0714946	0.377792
R4GHJ7	Uncharacterized protein OS=Gallus gallus GN=PHKB PE=4 SV=1 - [R4GHJ7_CHICK]	51.83	0.0185	2	2	2	2	1079	123	7.23	0.282302	0.05065
R4GJN7	Histone H2A OS=Gallus gallus GN=LOC100857391 PE=3 SV=1 - [R4GJN7_CHICK]	227.09	0.4755	2	1	4	43	143	15	10.87	-0.281767	0.348687
F1P2D9	Uncharacterized protein OS=Gallus gallus GN=MORC3 PE=4 SV=2 - [F1P2D9_CHICK]	88.91	0.0227	2	2	2	2	924	105.2	5.6	-0.0886868	0.377561
F1NQZ9	Uncharacterized protein (Fragment) OS=Gallus gallus GN=GCLC PE=4 SV=2 - [F1NQZ9_CHICK]	407.73	0.3118	1	13	13	26	587	66.8	5.72	0.132833	0.0683146
E1C576	Uncharacterized protein OS=Gallus gallus GN=TTC37 PE=4 SV=2 - [E1C576_CHICK]	22.34	0.0069	1	1	1	1	1585	177.2	7.03	0.0470901	0.674736
B5M200	Beta-actin (Fragment) OS=Gallus gallus PE=2 SV=1 - [B5M200_CHICK]	319	0.7912	3	1	8	153	91	10.2	6.68	0.654083	0.380565
F1N8P3	Uncharacterized protein OS=Gallus gallus GN=ACTBL2 PE=3 SV=2 - [F1N8P3_CHICK]	716.15	0.5279	2	2	17	447	377	42	5.31	-0.173286	0.179387
E1C297	Uncharacterized protein OS=Gallus gallus GN=MGST3 PE=4 SV=2 - [E1C297_CHICK]	205.28	0.3974	1	4	4	34	156	17.2	9.22	-0.172048	0.129836
H9L3I5	Uncharacterized protein OS=Gallus gallus GN=LOC769729 PE=4 SV=1 - [H9L3I5_CHICK]	90.08	0.2184	1	3	3	10	174	19.6	6.67	0.0229203	0.887681
E1C8Q3	Uncharacterized protein OS=Gallus gallus GN=ALDH18A1 PE=4 SV=2 - [E1C8Q3_CHICK]	314.87	0.1434	1	9	9	22	802	87.8	7.2	0.24202	0.0610909
E1BZ79	Uncharacterized protein (Fragment) OS=Gallus gallus GN=MVK PE=3 SV=2 - [E1BZ79_CHICK]	85.72	0.1641	1	4	4	6	329	34.9	7.5	-0.0743809	0.206988
E1BWX9	Uncharacterized protein OS=Gallus gallus GN=UROC1 PE=3 SV=2 - [E1BWX9_CHICK]	600.77	0.3561	1	13	13	39	601	66.4	6.43	0.0159851	0.858303
V9LU50	Carboxylesterase (Fragment) OS=Gallus gallus PE=2 SV=1 - [V9LU50_CHICK]	1096.86	0.51	1	2	23	408	549	61.2	5.48	-0.0451946	0.796487
E1BYN1	Uncharacterized protein OS=Gallus gallus GN=LOC100858955 PE=4 SV=2 - [E1BYN1_CHICK]	873.3	0.4363	1	5	18	208	557	61.9	5.6	0.424845	0.000108986
F1NYT3	Uncharacterized protein OS=Gallus gallus GN=CES1 PE=4 SV=2 - [F1NYT3_CHICK]	1011	0.4668	1	1	21	386	557	61.8	5.47	0.158997	0.920098
F1NR44	Uncharacterized protein OS=Gallus gallus GN=ECHS1 PE=3 SV=2 - [F1NR44_CHICK]	848.86	0.6478	1	16	16	214	301	31.6	8.69	-0.00600799	0.906145
E1C8P2	Uncharacterized protein OS=Gallus gallus GN=PAPSS1 PE=3 SV=1 - [E1C8P2_CHICK]	71.84	0.0369	1	1	2	3	624	70.8	6.74	#NUM!	#NUM!
R4GJQ2	Uncharacterized protein OS=Gallus gallus GN=LOC426398 PE=3 SV=1 - [R4GJQ2_CHICK]	408.71	0.2117	1	13	13	27	685	78.3	6.1	-0.112716	0.173141
Q5ZKP8	Lysine--tRNA ligase OS=Gallus gallus GN=RCJMB04_9m1 PE=2 SV=1 - [Q5ZKP8_CHICK]	611.24	0.4237	3	20	20	58	590	67.9	6.29	0.0513299	0.384486
E1C5D2	Uncharacterized protein OS=Gallus gallus GN=NDUFS5 PE=4 SV=1 - [E1C5D2_CHICK]	162.37	0.434	1	4	4	10	106	12.6	8.18	-0.079638	0.504364
Q5ZK20	Putative uncharacterized protein OS=Gallus gallus GN=RCJMB04_13l7 PE=2 SV=1 - [Q5ZK20_CHICK]	1149.9	0.4657	2	33	33	165	627	70.9	5.1	-0.0267107	0.590328
E1BTZ6	Uncharacterized protein OS=Gallus gallus GN=PHKA2 PE=4 SV=2 - [E1BTZ6_CHICK]	67.2	0.0385	1	3	3	4	1221	137	6.34	0.0253811	0.578783
F1P3F9	Glutamate dehydrogenase OS=Gallus gallus GN=GLUD1 PE=3 SV=2 - [F1P3F9_CHICK]	1124.59	0.6843	1	6	23	436	434	47.6	8.18	-0.0199026	0.853797
E1BY27	Uncharacterized protein OS=Gallus gallus GN=MYO18A PE=4 SV=2 - [E1BY27_CHICK]	347.31	0.0725	1	12	12	15	2056	231.8	6.37	-0.0907112	0.164179
F1P4X7	Uncharacterized protein OS=Gallus gallus GN=DHCR7 PE=4 SV=2 - [F1P4X7_CHICK]	98.8	0.0696	1	3	3	8	474	55.2	8.21	-0.272224	0.127311
Q5ZLD1	Uncharacterized protein OS=Gallus gallus GN=FH PE=2 SV=1 - [Q5ZLD1_CHICK]	759.54	0.503	1	19	19	105	507	54.3	9.13	0.071445	0.447059
F1NEB6	Uncharacterized protein OS=Gallus gallus GN=CYP46A1 PE=3 SV=2 - [F1NEB6_CHICK]	50.95	0.0481	1	2	2	2	499	57.6	8.65	0.0750903	0.380381
R4GM54	Uncharacterized protein OS=Gallus gallus GN=RDH10 PE=3 SV=1 - [R4GM54_CHICK]	75	0.115	1	3	3	3	339	37.9	8.09	0.00658936	0.939781
F1NST1	Uncharacterized protein (Fragment) OS=Gallus gallus GN=ACSS2 PE=4 SV=2 - [F1NST1_CHICK]	280.71	0.1649	1	9	9	14	655	73.8	7.27	-0.0188941	0.756967
F1NWJ9	Unconventional myosin-VI OS=Gallus gallus GN=MYO6 PE=2 SV=1 - [F1NWJ9_CHICK]	36.17	0.0118	2	1	1	1	1276	147.5	8.63	#NUM!	#NUM!
F1NU06	Uncharacterized protein OS=Gallus gallus GN=BRP44 PE=4 SV=2 - [F1NU06_CHICK]	249.53	0.6391	1	8	8	24	133	15.1	10.07	-0.157003	0.429739
F1NNP0	Uncharacterized protein OS=Gallus gallus GN=CYP4B1 PE=3 SV=2 - [F1NNP0_CHICK]	507.08	0.3829	1	16	17	38	504	57.5	8.65	0.15299	0.0956811
F1NBX4	Uncharacterized protein OS=Gallus gallus GN=RPL27A PE=3 SV=2 - [F1NBX4_CHICK]	285.78	0.3784	1	7	7	21	148	16.8	10.86	-0.149433	0.706335
E1C4M0	Uncharacterized protein OS=Gallus gallus PE=3 SV=1 - [E1C4M0_CHICK]	434.2	0.458	1	14	14	48	286	30.7	10.24	-0.0376526	0.684408
Q5ZMW1	Uncharacterized protein OS=Gallus gallus GN=ACO2 PE=2 SV=1 - [Q5ZMW1_CHICK]	1177.39	0.4318	2	29	29	166	785	85.6	7.9	0.124486	0.140193
E1C291	Uncharacterized protein OS=Gallus gallus GN=TBC1D22B PE=4 SV=1 - [E1C291_CHICK]	34.12	0.0158	2	1	1	1	507	59.2	7.59	#NUM!	#NUM!
E1C0D8	Uncharacterized protein OS=Gallus gallus GN=NLN PE=3 SV=2 - [E1C0D8_CHICK]	78.5	0.033	1	2	2	3	698	80.3	6.74	-0.490528	0.107201
R4GJ67	Uncharacterized protein OS=Gallus gallus PE=4 SV=1 - [R4GJ67_CHICK]	405.39	0.4242	1	9	9	74	264	29	9.52	-0.0476814	0.778149
F1NPG2	Isocitrate dehydrogenase [NADP] (Fragment) OS=Gallus gallus GN=IDH1 PE=3 SV=1 - [F1NPG2_CHICK]	1204.94	0.6962	1	29	30	273	418	46.9	8.12	0.0871531	0.199814
H9L366	Isocitrate dehydrogenase [NADP] OS=Gallus gallus GN=IDH2 PE=3 SV=2 - [H9L366_CHICK]	1313.12	0.6173	2	30	31	297	452	50.4	8.84	-0.0190219	0.818896
E1BQC5	Uncharacterized protein OS=Gallus gallus GN=PARP14 PE=4 SV=2 - [E1BQC5_CHICK]	165.01	0.0419	1	5	5	8	1671	187.2	6.55	-0.230486	0.0169302
F1N8G9	Uncharacterized protein OS=Gallus gallus GN=EIF4G3 PE=4 SV=2 - [F1N8G9_CHICK]	159.3	0.0269	1	1	4	10	1600	176.1	5.2	0.0993276	0.32772
E1BSD9	Uncharacterized protein OS=Gallus gallus GN=PDHX PE=3 SV=2 - [E1BSD9_CHICK]	433.78	0.2689	2	11	11	35	502	53.2	6.47	-0.0159414	0.701312
F1NG51	Uncharacterized protein OS=Gallus gallus GN=VAV2 PE=4 SV=1 - [F1NG51_CHICK]	39.5	0.0107	2	1	1	1	839	97.4	6.8	-0.0450683	0.530403
H9L0A2	Uncharacterized protein (Fragment) OS=Gallus gallus GN=OASL PE=4 SV=2 - [H9L0A2_CHICK]	375.44	0.2899	8	11	11	40	514	58.4	7.74	-0.635178	0.231988
E1C8Z8	Uncharacterized protein OS=Gallus gallus GN=ALDH4A1 PE=3 SV=1 - [E1C8Z8_CHICK]	800.84	0.3902	4	17	18	122	551	60.6	8.03	0.139738	0.256578
F1NT18	Uncharacterized protein OS=Gallus gallus GN=CYP3A7 PE=2 SV=1 - [F1NT18_CHICK]	445.33	0.3799	3	14	14	29	508	58.2	8.82	-0.297272	0.116623
E1C516	Uncharacterized protein OS=Gallus gallus GN=PROSC PE=3 SV=1 - [E1C516_CHICK]	345.11	0.471	1	11	11	37	276	30.1	8.25	0.1693	0.256405
Q5ZHU2	Uncharacterized protein OS=Gallus gallus GN=RCJMB04_33e1 PE=2 SV=1 - [Q5ZHU2_CHICK]	1026.12	0.601	2	29	29	105	609	67.9	7.01	0.0727904	0.217963
E1BWV5	Uncharacterized protein OS=Gallus gallus GN=EXD3 PE=4 SV=1 - [E1BWV5_CHICK]	14.06	0.0179	1	1	1	1	725	83.1	7.01	0.2183	0.187429
R4GF49	Uncharacterized protein (Fragment) OS=Gallus gallus GN=NDUFV1 PE=4 SV=1 - [R4GF49_CHICK]	674.34	0.5753	3	18	18	57	438	47.5	8.21	-0.0111026	0.909326
E1BV75	Uncharacterized protein OS=Gallus gallus GN=DHRS7 PE=3 SV=1 - [E1BV75_CHICK]	557.04	0.4583	1	10	10	217	336	37.7	9.1	0.0496734	0.664872
F1NQH8	Uncharacterized protein OS=Gallus gallus PE=3 SV=2 - [F1NQH8_CHICK]	386.19	0.2343	2	9	9	35	461	49.5	9.14	-0.100004	0.00246761
F1N843	Tyrosine-protein phosphatase non-receptor type OS=Gallus gallus GN=PTPN6 PE=3 SV=1 - [F1N843_CHICK]	58.92	0.0414	3	2	2	2	604	68.3	7.84	-0.192967	0.0251379
F1NZF7	Uncharacterized protein OS=Gallus gallus GN=SF3B3 PE=2 SV=2 - [F1NZF7_CHICK]	242.17	0.0795	3	8	8	9	1107	122.7	5.31	0.0054346	0.96535
E1C016	Uncharacterized protein OS=Gallus gallus GN=COPB2 PE=4 SV=1 - [E1C016_CHICK]	503.06	0.1884	1	16	16	35	913	103.1	5.24	-0.126692	0.187578
E1BZG4	Uncharacterized protein OS=Gallus gallus GN=EEF1D PE=3 SV=2 - [E1BZG4_CHICK]	303.69	0.1645	1	5	8	29	687	76.1	4.97	0.148994	0.304935
E1C928	Uncharacterized protein OS=Gallus gallus GN=TXNRD3 PE=3 SV=1 - [E1C928_CHICK]	46.03	0.0381	1	2	2	2	604	66.4	6.3	-0.103481	0.287917
F1NF19	Uncharacterized protein OS=Gallus gallus PE=4 SV=2 - [F1NF19_CHICK]	106.88	0.0878	2	4	4	6	615	70	8.81	-0.130915	0.00103324
Q8QG67	Glutathione peroxidase OS=Gallus gallus GN=GPX4 PE=2 SV=3 - [Q8QG67_CHICK]	379.91	0.5529	1	10	10	45	170	19.4	7.85	0.0456658	0.604613
F1NIK4	Uncharacterized protein (Fragment) OS=Gallus gallus GN=LOC100859914 PE=3 SV=2 - [F1NIK4_CHICK]	52.37	0.0614	1	2	2	2	114	13.2	10.8	-0.0554478	0.706436
F1NCC7	Uncharacterized protein OS=Gallus gallus GN=AGMO PE=4 SV=2 - [F1NCC7_CHICK]	22.8	0.0275	1	1	1	1	510	57.9	9.16	-0.0425547	0.735826
R4GI96	Uncharacterized protein OS=Gallus gallus GN=HDHD2 PE=4 SV=1 - [R4GI96_CHICK]	229.43	0.3831	1	6	6	15	261	28.6	7.15	0.0417461	0.690155
F1P2A6	Adenosine deaminase OS=Gallus gallus GN=ADA PE=3 SV=2 - [F1P2A6_CHICK]	79.42	0.1597	2	4	4	5	357	40.7	6.1	-0.116041	0.0272248
Q90WF1	Filamin OS=Gallus gallus PE=2 SV=1 - [Q90WF1_CHICK]	649.29	0.1138	4	20	21	35	2610	272.8	6.35	0.0437979	0.716626
Q5F426	Uncharacterized protein OS=Gallus gallus GN=PDHA1 PE=2 SV=1 - [Q5F426_CHICK]	624.38	0.4987	1	17	17	77	399	44.4	7.96	0.0590445	0.246911
F1NJI0	Annexin (Fragment) OS=Gallus gallus GN=ANXA5 PE=3 SV=1 - [F1NJI0_CHICK]	1115.55	0.7009	3	24	24	246	321	36.2	5.82	-0.035782	0.533853
E1BT93	Uncharacterized protein (Fragment) OS=Gallus gallus GN=ALDH2 PE=3 SV=2 - [E1BT93_CHICK]	1706.75	0.7829	2	35	37	587	525	57.3	7.97	-0.0272549	0.660286
Q9YHD2	Nuclear calmodulin-binding protein (Fragment) OS=Gallus gallus GN=URP PE=2 SV=1 - [Q9YHD2_CHICK]	598.4	0.214	1	15	15	58	757	84.1	4.72	0.0301285	0.690371
E1BSL7	Uncharacterized protein (Fragment) OS=Gallus gallus GN=ERP44 PE=4 SV=2 - [E1BSL7_CHICK]	299.94	0.2759	1	9	9	31	406	46.9	5.39	-0.0545135	0.659981
E1C6A1	Uncharacterized protein OS=Gallus gallus GN=NNT PE=4 SV=2 - [E1C6A1_CHICK]	1184.77	0.3297	1	31	31	141	1086	113.7	7.34	-0.0124996	0.721869
R4GGG4	Uncharacterized protein (Fragment) OS=Gallus gallus GN=LOC422528 PE=3 SV=1 - [R4GGG4_CHICK]	66.18	0.0827	1	3	3	3	544	61.6	9.42	-0.18085	0.0545636
E1BZS2	Uncharacterized protein OS=Gallus gallus GN=NAP1L1 PE=3 SV=1 - [E1BZS2_CHICK]	213.96	0.229	1	5	7	15	393	45.3	4.45	-0.0849522	0.376338
E1BQJ3	Uncharacterized protein OS=Gallus gallus GN=LOC428379 PE=4 SV=2 - [E1BQJ3_CHICK]	21.36	0.0116	1	1	1	1	689	77.9	6.62	0.136345	0.020173
F1NCS6	Uncharacterized protein OS=Gallus gallus GN=MTHFD1L PE=3 SV=2 - [F1NCS6_CHICK]	1024.02	0.3972	1	25	25	85	934	100.9	8.02	0.0723681	0.0290025
R4GKF2	Uncharacterized protein OS=Gallus gallus GN=LOC776432 PE=3 SV=1 - [R4GKF2_CHICK]	439.42	0.3987	1	11	11	49	316	34.8	8.84	0.143433	0.460145
Q5ZK86	Uncharacterized protein OS=Gallus gallus GN=RCJMB04_12f15 PE=2 SV=1 - [Q5ZK86_CHICK]	374.1	0.282	3	11	11	23	500	56.4	6.07	0.0685999	0.298585
Q5F424	Uncharacterized protein OS=Gallus gallus GN=LRRC10 PE=2 SV=1 - [Q5F424_CHICK]	981.93	0.5626	1	25	25	76	535	57.4	6.28	-0.00866543	0.726819
Q6B344	Annexin OS=Gallus gallus PE=2 SV=1 - [Q6B344_CHICK]	1504.31	0.625	4	39	40	151	672	75.2	5.82	0.0250472	0.849815
E1BRE2	NAD-dependent protein deacylase sirtuin-5, mitochondrial OS=Gallus gallus GN=SIRT5 PE=3 SV=1 - [SIR5_CHICK]	85.71	0.1133	2	3	3	3	309	33.9	7.44	0.0615335	0.479328
O42484	17-beta-hydroxysteroid dehydrogenase type IV OS=Gallus gallus GN=HSD17B4 PE=2 SV=1 - [O42484_CHICK]	1075.46	0.5878	3	28	28	142	735	80.1	8.37	0.0995875	0.040737
R4GJK0	Uncharacterized protein OS=Gallus gallus GN=RCC1 PE=4 SV=1 - [R4GJK0_CHICK]	294.88	0.2422	1	6	6	14	417	44.5	7.25	0.00557066	0.974469
Q8AWB7	Structural maintenance of chromosomes protein OS=Gallus gallus GN=SMC1 PE=2 SV=2 - [Q8AWB7_CHICK]	75	0.0267	1	2	2	3	1234	142.9	7.97	-0.00259075	0.985935
Q5ZLW0	Uncharacterized protein OS=Gallus gallus GN=LCP1 PE=2 SV=1 - [Q5ZLW0_CHICK]	1315.96	0.5929	2	27	31	216	624	69.7	5.29	0.00755536	0.965822
F1NSQ4	Mitochondrial Rho GTPase OS=Gallus gallus GN=RHOT1 PE=3 SV=1 - [F1NSQ4_CHICK]	84.26	0.0712	2	4	4	4	618	70.8	6.15	-0.00979995	0.923935
Q5ZHP2	Uncharacterized protein OS=Gallus gallus GN=C26H6orf130 PE=2 SV=1 - [Q5ZHP2_CHICK]	166.53	0.3333	1	5	5	10	189	20.9	8.02	0.0581914	0.593446
F1NZ81	Uncharacterized protein OS=Gallus gallus GN=ACADSB PE=3 SV=2 - [F1NZ81_CHICK]	475.12	0.4306	2	11	11	39	432	47.6	7.8	0.128857	0.0182934
F1NWB7	Endoplasmin OS=Gallus gallus GN=HSP90B1 PE=3 SV=1 - [F1NWB7_CHICK]	1751.88	0.5233	5	43	43	292	795	91.5	4.89	-0.0748083	0.3524
F1P470	D-dopachrome decarboxylase OS=Gallus gallus GN=DDT PE=4 SV=1 - [F1P470_CHICK]	371.13	0.8983	2	8	8	68	118	12.8	7.14	0.35371	0.10181
E1C2I3	Uncharacterized protein OS=Gallus gallus GN=ERGIC1 PE=4 SV=2 - [E1C2I3_CHICK]	173.45	0.2422	1	6	6	14	289	32.5	6.74	-0.0123577	0.889451
E1BXK3	Uncharacterized protein OS=Gallus gallus GN=GYS2 PE=4 SV=1 - [E1BXK3_CHICK]	380.71	0.179	1	11	11	29	704	81	6.47	0.103579	0.279552
F1NV93	Peptidyl-prolyl cis-trans isomerase (Fragment) OS=Gallus gallus GN=PPIB PE=3 SV=2 - [F1NV93_CHICK]	217.76	0.4286	1	1	7	34	147	16.2	9.11	0.116644	0.487478
F1NRZ6	Uncharacterized protein OS=Gallus gallus GN=IPO9 PE=4 SV=2 - [F1NRZ6_CHICK]	124.74	0.0518	1	3	3	3	888	99.4	4.73	-0.000756154	0.994702
F1NJ60	Protein Hook homolog 1 OS=Gallus gallus GN=HOOK1 PE=4 SV=1 - [F1NJ60_CHICK]	33.49	0.0111	2	1	1	1	718	83	5.21	#NUM!	#NUM!
F1NEL6	Uncharacterized protein OS=Gallus gallus GN=CASP6 PE=3 SV=1 - [F1NEL6_CHICK]	53.33	0.0954	2	3	3	3	304	34.5	7.27	-0.0558939	0.664487
Q5ZIB3	Uncharacterized protein OS=Gallus gallus GN=RCJMB04_28i4 PE=2 SV=1 - [Q5ZIB3_CHICK]	41.09	0.0806	2	2	2	2	273	30.5	5.36	-0.0397459	0.664614
Q90864	Beta-H globin OS=Gallus gallus GN=HBE1 PE=3 SV=1 - [Q90864_CHICK]	402.56	0.7483	4	3	10	406	147	16.4	9.11	-0.0621423	0.801716
F1NMZ3	Hemoglobin subunit epsilon OS=Gallus gallus GN=HBE PE=2 SV=1 - [F1NMZ3_CHICK]	205.97	0.3878	3	1	5	195	147	16.6	8.91	#NUM!	#NUM!
F1NTJ5	Uncharacterized protein OS=Gallus gallus GN=MYO1B PE=4 SV=2 - [F1NTJ5_CHICK]	449.96	0.1813	2	15	15	24	1136	132	9.38	0.00397495	0.924957
F1P3F1	Adenosylhomocysteinase OS=Gallus gallus GN=Gga.51956 PE=3 SV=2 - [F1P3F1_CHICK]	1014.47	0.4342	1	21	23	183	691	74.4	9.23	0.0766438	0.134733
F1NK40	Uncharacterized protein OS=Gallus gallus GN=LOC100858010 PE=4 SV=2 - [F1NK40_CHICK]	1227.91	0.3223	2	32	33	112	1474	163.2	6.37	-0.240901	0.15279
F1NGY5	Uncharacterized protein OS=Gallus gallus GN=PLAA PE=4 SV=2 - [F1NGY5_CHICK]	205.11	0.1071	1	6	6	8	794	87.2	6.29	0.0836751	0.184304
R4GKP5	Uncharacterized protein OS=Gallus gallus GN=Gga.53868 PE=4 SV=1 - [R4GKP5_CHICK]	17.06	0.0286	1	1	1	2	210	21.9	5.31	0.160279	0.17558
R4GL28	Uncharacterized protein OS=Gallus gallus GN=SLC27A2 PE=4 SV=1 - [R4GL28_CHICK]	256.07	0.2674	1	8	8	28	359	40.3	7.83	0.0477142	0.772252
E1BSJ2	40S ribosomal protein S21 OS=Gallus gallus GN=RPS21 PE=3 SV=2 - [E1BSJ2_CHICK]	47.69	0.2289	1	2	2	5	83	9.1	8.5	0.0959106	0.41531
F1NMN7	Uncharacterized protein OS=Gallus gallus PE=3 SV=2 - [F1NMN7_CHICK]	902.41	0.5358	1	20	20	211	517	57.1	9.13	-0.0219837	0.566793
Q5ZKM2	Elongation factor 1-alpha OS=Gallus gallus GN=RCJMB04_10b5 PE=2 SV=1 - [Q5ZKM2_CHICK]	824.58	0.6602	4	21	21	321	462	50.1	9.01	0.111198	0.0747517
F1NEB4	Protein transport protein Sec31A OS=Gallus gallus GN=SEC31A PE=4 SV=2 - [F1NEB4_CHICK]	436.53	0.1215	3	11	11	34	1226	133.2	6.28	-0.014322	0.825391
E1C4C8	Uncharacterized protein OS=Gallus gallus GN=SGK223 PE=4 SV=2 - [E1C4C8_CHICK]	17.6	0.0037	1	1	1	2	1353	146.8	6.77	#NUM!	#NUM!
F1NUB0	Uncharacterized protein (Fragment) OS=Gallus gallus GN=LOC429682 PE=4 SV=2 - [F1NUB0_CHICK]	64.21	0.1101	3	2	2	2	227	25.3	7.88	0.0863593	0.621442
R4GM10	Fructose-bisphosphate aldolase OS=Gallus gallus GN=ALDOC PE=3 SV=1 - [R4GM10_CHICK]	375	0.2802	2	6	8	99	364	39.3	6.64	-0.093405	0.509099
F1N9V4	Uncharacterized protein OS=Gallus gallus GN=LANCL1 PE=4 SV=2 - [F1N9V4_CHICK]	68.79	0.0975	2	3	3	6	400	45.2	7.78	0.0059985	0.959231
E1C8M8	Uncharacterized protein OS=Gallus gallus GN=ABAT PE=3 SV=2 - [E1C8M8_CHICK]	384.45	0.3346	1	14	14	35	541	60.9	8.37	0.0146764	0.922612
R4GG92	Uncharacterized protein (Fragment) OS=Gallus gallus GN=LOC100859676 PE=4 SV=1 - [R4GG92_CHICK]	282.76	0.314	1	10	10	30	344	38.3	6.9	-0.100294	0.34775
E1C892	Uncharacterized protein OS=Gallus gallus GN=MRPL46 PE=4 SV=2 - [E1C892_CHICK]	83.58	0.0804	1	1	2	2	286	32.8	8.84	0.127993	0.104344
H9L0H3	Alpha-actinin-4 (Fragment) OS=Gallus gallus GN=ACTN4 PE=4 SV=2 - [H9L0H3_CHICK]	1013.88	0.5478	2	1	27	104	617	71.6	6.09	0.0594834	0.420929
Q5F3L8	Uncharacterized protein OS=Gallus gallus GN=RCJMB04_13p9 PE=2 SV=1 - [Q5F3L8_CHICK]	180.96	0.1761	2	6	6	7	511	57.1	4.88	-0.0624284	0.495806
Q2MJT5	Fatty acid translocase OS=Gallus gallus PE=2 SV=1 - [Q2MJT5_CHICK]	427.37	0.2293	3	11	11	62	471	52.6	8.37	0.0907156	0.528311
F1P419	Uncharacterized protein OS=Gallus gallus GN=DAK PE=4 SV=2 - [F1P419_CHICK]	322.43	0.4696	1	7	7	45	230	23.4	7.77	0.0570451	0.594483
H9KZD2	Uncharacterized protein OS=Gallus gallus GN=METTL7A PE=4 SV=2 - [H9KZD2_CHICK]	282.29	0.4836	1	8	8	16	244	27.7	8.57	0.0820948	0.396828
F1P014	Uncharacterized protein (Fragment) OS=Gallus gallus GN=C8G PE=3 SV=2 - [F1P014_CHICK]	22.6	0.0427	1	1	1	1	211	23.3	7.36	#NUM!	#NUM!
Q6B842	Carnitine palmitoyltransferase I OS=Gallus gallus GN=CPT1A PE=2 SV=1 - [Q6B842_CHICK]	770.68	0.3636	1	23	23	82	770	87.8	8.44	-0.0692239	0.488255
F1NF84	Uncharacterized protein (Fragment) OS=Gallus gallus GN=GOLGA2 PE=4 SV=2 - [F1NF84_CHICK]	176.47	0.0898	1	9	9	9	1025	117	5.19	0.228512	0.201271
E1C1X8	Uncharacterized protein (Fragment) OS=Gallus gallus GN=LMF1 PE=4 SV=2 - [E1C1X8_CHICK]	28.13	0.018	1	1	1	1	500	57.7	8.75	#NUM!	#NUM!
H9L340	ATP synthase subunit beta (Fragment) OS=Gallus gallus GN=ATP5B PE=2 SV=2 - [H9L340_CHICK]	1592.87	0.7702	2	26	26	689	496	52.9	5.21	-0.0265759	0.658556
R4GL04	Uncharacterized protein OS=Gallus gallus GN=LOC100858836 PE=4 SV=1 - [R4GL04_CHICK]	724.32	0.5763	1	18	18	125	413	45.9	6.39	0.119956	0.12896
F1NYB1	Uncharacterized protein OS=Gallus gallus GN=TUBB3 PE=2 SV=2 - [F1NYB1_CHICK]	927.43	0.6247	2	1	19	177	445	49.8	4.86	-0.138686	0.315513
F1NIL3	Uncharacterized protein (Fragment) OS=Gallus gallus PE=4 SV=2 - [F1NIL3_CHICK]	120.14	0.2736	1	3	3	20	106	11.7	9.83	-0.043729	0.776744
E1C006	Proteasome subunit alpha type OS=Gallus gallus GN=PSMA2 PE=3 SV=1 - [E1C006_CHICK]	304.08	0.3632	2	6	6	35	234	25.9	7.49	0.0586938	0.135019
F1NVF0	Vacuolar protein sorting-associated protein 35 OS=Gallus gallus GN=VPS35 PE=3 SV=1 - [F1NVF0_CHICK]	377.52	0.1533	2	9	9	14	796	91.7	5.58	-0.00699861	0.84147
F1NJ73	Uncharacterized protein (Fragment) OS=Gallus gallus GN=AK2 PE=3 SV=2 - [F1NJ73_CHICK]	612.31	0.5976	1	13	13	72	251	27.3	8.43	-0.0175599	0.74376
E1C2S1	Talin-1 OS=Gallus gallus GN=TLN1 PE=4 SV=2 - [E1C2S1_CHICK]	2056.22	0.318	2	47	54	145	2541	271.7	6.23	0.015748	0.851689
Q6XD56	SWAN ribonucleoprotein OS=Gallus gallus PE=2 SV=1 - [Q6XD56_CHICK]	112.3	0.0575	1	5	5	8	887	93.8	8.31	-0.0567906	0.493491
H9KZT7	Uncharacterized protein (Fragment) OS=Gallus gallus GN=ILF2 PE=4 SV=1 - [H9KZT7_CHICK]	97.78	0.0821	1	3	3	6	390	42.9	5.41	0.0273216	0.706763
F1NN63	Uncharacterized protein OS=Gallus gallus GN=PGM1 PE=2 SV=1 - [F1NN63_CHICK]	1068.18	0.5698	2	30	30	180	602	66.4	8.82	-0.00540482	0.931426
F7BWA2	Signal transducer and activator of transcription OS=Gallus gallus GN=STAT1 PE=3 SV=1 - [F7BWA2_CHICK]	187.45	0.1163	2	7	8	14	748	86.4	7.75	-0.41814	0.22088
E1BRI3	Uncharacterized protein OS=Gallus gallus GN=ALDH5A1 PE=3 SV=2 - [E1BRI3_CHICK]	868.02	0.5073	2	21	21	97	548	57.9	9.06	0.0833452	0.175258
F1NEW0	Uncharacterized protein OS=Gallus gallus GN=LMAN1 PE=4 SV=1 - [F1NEW0_CHICK]	513.26	0.3161	2	12	13	46	503	56.5	5.86	-0.0632328	0.191118
E1BQC2	Uncharacterized protein OS=Gallus gallus GN=LTF PE=4 SV=2 - [E1BQC2_CHICK]	1266.33	0.5447	1	4	32	157	705	77.8	7.12	-0.460269	0.101077
Q4ADG4	Ovotransferrin BC type OS=Gallus gallus GN=TFEW PE=2 SV=1 - [Q4ADG4_CHICK]	1214.34	0.5574	2	3	31	139	705	77.8	7.24	-0.174931	0.238331
F1NXW3	Uncharacterized protein (Fragment) OS=Gallus gallus GN=RPS15A PE=3 SV=2 - [F1NXW3_CHICK]	308.04	0.4934	1	7	7	24	152	17.3	9.79	-0.0389591	0.831153
F1NBC1	Uncharacterized protein (Fragment) OS=Gallus gallus GN=BAAT PE=4 SV=2 - [F1NBC1_CHICK]	574.96	0.4893	1	13	13	48	419	45.6	6.62	-0.0193381	0.726364
E1C5V6	Acyl-coenzyme A oxidase OS=Gallus gallus GN=ACOX2 PE=3 SV=1 - [E1C5V6_CHICK]	887.53	0.4696	1	23	23	71	675	75.4	8	0.172528	0.0276665
E1BYJ7	Uncharacterized protein (Fragment) OS=Gallus gallus GN=PAFAH2 PE=4 SV=2 - [E1BYJ7_CHICK]	25.94	0.0204	1	1	1	1	393	43.5	8.41	#NUM!	#NUM!
Q5F420	Uncharacterized protein OS=Gallus gallus GN=ACSL1 PE=2 SV=1 - [Q5F420_CHICK]	1414.83	0.618	4	36	37	186	699	78.5	8.03	0.0123226	0.893605
Q7ZZK3	Phosphorylase OS=Gallus gallus PE=2 SV=1 - [Q7ZZK3_CHICK]	1713.9	0.5239	4	32	39	216	857	98.5	6.52	0.131637	0.0312834
E1BSN7	Phosphorylase OS=Gallus gallus GN=PYGB PE=3 SV=2 - [E1BSN7_CHICK]	344.04	0.1412	2	2	9	65	843	96.7	6.44	-0.263836	0.100895
Q5ZLV5	Uncharacterized protein OS=Gallus gallus GN=RCJMB04_4l9 PE=2 SV=1 - [Q5ZLV5_CHICK]	717.54	0.4863	2	19	19	67	475	53	6.05	0.0804272	0.532428
F1NCU9	Serum paraoxonase/arylesterase 2 OS=Gallus gallus GN=PON2 PE=2 SV=2 - [F1NCU9_CHICK]	725.22	0.613	2	15	15	178	354	39.3	5.43	0.107304	0.515363
F1NF80	Uncharacterized protein (Fragment) OS=Gallus gallus GN=LOC100859789 PE=4 SV=2 - [F1NF80_CHICK]	584.85	0.4939	1	11	11	48	330	35.2	6.95	0.0497197	0.465165
F1NLJ7	Uncharacterized protein OS=Gallus gallus GN=MAN2C1 PE=4 SV=2 - [F1NLJ7_CHICK]	148.36	0.1431	2	6	6	6	657	74.1	5.73	-0.0249434	0.680066
F1P0K1	Uncharacterized protein OS=Gallus gallus GN=RRBP1 PE=4 SV=2 - [F1P0K1_CHICK]	1687.31	0.4975	5	42	43	154	997	111.9	5.31	0.260741	0.320957
Q9I882	Protein kinase C inhibitor OS=Gallus gallus GN=chPKCI PE=2 SV=1 - [Q9I882_CHICK]	226.78	0.7778	1	6	6	28	126	13.8	6.79	0.0602639	0.578884
E1BSV1	Uncharacterized protein OS=Gallus gallus GN=DMGDH PE=3 SV=2 - [E1BSV1_CHICK]	915.92	0.3571	1	24	24	68	868	96.4	7.66	-0.0534936	0.672303
E1BW06	Uncharacterized protein (Fragment) OS=Gallus gallus GN=ECI2 PE=4 SV=2 - [E1BW06_CHICK]	494.11	0.3794	1	12	12	38	398	44	8.48	-0.0646315	0.380163
F1NPQ0	Uncharacterized protein OS=Gallus gallus GN=LOC100859465 PE=4 SV=1 - [F1NPQ0_CHICK]	166.42	0.1316	2	4	4	6	456	53	6.67	0.138853	0.0262491
F1NVX7	Uncharacterized protein (Fragment) OS=Gallus gallus GN=TM9SF4 PE=4 SV=1 - [F1NVX7_CHICK]	48.38	0.0763	1	3	3	6	642	74.9	6.42	-0.115288	0.109869
F1N9N4	Stathmin-3 OS=Gallus gallus GN=NPC2 PE=2 SV=1 - [F1N9N4_CHICK]	169.05	0.4459	2	4	4	14	148	16.2	6.51	0.123646	0.362413
F1P2G5	Uncharacterized protein (Fragment) OS=Gallus gallus GN=UBR4 PE=2 SV=2 - [F1P2G5_CHICK]	149.88	0.0125	1	4	4	5	5120	567.4	6.1	-0.00625491	0.926413
H9L1C2	Transaldolase OS=Gallus gallus GN=TALDO1 PE=3 SV=2 - [H9L1C2_CHICK]	398.32	0.3531	2	12	12	40	337	37.6	7.47	0.0408774	0.393282
F1NDX6	Uncharacterized protein OS=Gallus gallus GN=Gga.54843 PE=4 SV=2 - [F1NDX6_CHICK]	22.53	0.0127	2	1	1	1	551	60	5.19	-0.00839284	0.932803
F1NJC7	Retinal dehydrogenase 1 OS=Gallus gallus GN=ALDH1A1 PE=3 SV=2 - [F1NJC7_CHICK]	1436.74	0.8193	4	33	35	314	509	55.8	7.56	0.0185638	0.852675
E9LUH6	MHC class I antigen (Fragment) OS=Gallus gallus GN=BF2 PE=2 SV=1 - [E9LUH6_CHICK]	205.84	0.2395	55	3	6	13	334	37.1	6.55	-0.161634	0.741959
O98232	MHC class I B-F heavy chain (Fragment) OS=Gallus gallus GN=B-F-minor PE=2 SV=1 - [O98232_CHICK]	162.34	0.2543	111	1	6	12	232	26.6	5.49	0.00285051	0.990158
F1CN05	MHC class I antigen OS=Gallus gallus PE=2 SV=1 - [F1CN05_CHICK]	133.49	0.1715	53	2	6	12	344	38.2	6.8	-0.287272	0.479148
O62864	MHC class I heavy chain B-F (Fragment) OS=Gallus gallus GN=B-F PE=2 SV=2 - [O62864_CHICK]	188.72	0.2888	56	1	5	12	232	26.9	5.53	0.0289993	0.917477
F1CMZ7	MHC class I antigen OS=Gallus gallus PE=2 SV=1 - [F1CMZ7_CHICK]	151.2	0.1366	34	0	6	12	344	37.9	6.54	#NUM!	#NUM!
F1NBD1	Uncharacterized protein OS=Gallus gallus GN=NARS PE=3 SV=2 - [F1NBD1_CHICK]	497.22	0.2648	2	12	12	27	559	64.1	6.04	-0.0219105	0.718185
F1NI86	Uncharacterized protein OS=Gallus gallus GN=GUSB PE=4 SV=1 - [F1NI86_CHICK]	168.35	0.0974	2	5	5	14	657	74.5	6.96	0.0939939	0.281668
F1NSU6	Uncharacterized protein (Fragment) OS=Gallus gallus GN=ZADH2 PE=4 SV=2 - [F1NSU6_CHICK]	141.92	0.2095	1	4	4	5	315	33.7	8.31	0.0263172	0.567075
P79781	Ubiquitin-40S ribosomal protein S27a OS=Gallus gallus GN=RPS27A PE=2 SV=3 - [RS27A_CHICK]	296.62	0.4679	7	7	7	77	156	18	9.64	0.204228	0.207027
H9L041	Uncharacterized protein OS=Gallus gallus GN=ATP13A1 PE=3 SV=2 - [H9L041_CHICK]	28.8	0.0136	1	1	2	3	1254	139.8	8.72	0.0527752	0.601085
E1BZ22	Uncharacterized protein OS=Gallus gallus GN=HSD11B1 PE=4 SV=1 - [E1BZ22_CHICK]	603.21	0.5648	1	12	12	73	301	32.9	6.95	-0.0383859	0.733742
Q90XD9	Transcriptional coactivator p100 (Fragment) OS=Gallus gallus PE=2 SV=1 - [Q90XD9_CHICK]	844.59	0.465	1	24	24	79	714	80.1	6.43	-0.0160387	0.368618
Q5ZM75	Uncharacterized protein OS=Gallus gallus GN=RCJMB04_2o24 PE=2 SV=1 - [Q5ZM75_CHICK]	434.34	0.3288	2	14	14	35	514	58.3	6.49	0.124072	0.0697349
R4GL55	Uncharacterized protein OS=Gallus gallus GN=LOC424014 PE=4 SV=1 - [R4GL55_CHICK]	508.08	0.5351	1	14	14	72	271	30.3	6.43	0.0427077	0.592441
Q5F473	Uncharacterized protein OS=Gallus gallus GN=NUP50 PE=2 SV=1 - [Q5F473_CHICK]	32.21	0.0363	1	1	1	3	468	50.1	6.8	0.181284	0.266854
F1NCM5	Uncharacterized protein OS=Gallus gallus GN=PTGR1 PE=4 SV=1 - [F1NCM5_CHICK]	727.48	0.6474	2	15	15	121	329	35.9	8.6	0.144473	0.078837
F1P064	Uncharacterized protein (Fragment) OS=Gallus gallus GN=IPO5 PE=4 SV=2 - [F1P064_CHICK]	190.01	0.091	1	8	8	11	1110	125.1	4.97	-0.0398855	0.455414
F1N849	Uncharacterized protein (Fragment) OS=Gallus gallus PE=4 SV=1 - [F1N849_CHICK]	22.64	0.008	2	1	1	3	997	109.5	7.56	-0.000296799	0.997916
E1C043	Uncharacterized protein OS=Gallus gallus GN=COX5A PE=4 SV=2 - [E1C043_CHICK]	345.31	0.5613	3	9	10	66	155	17	7.34	0.0839109	0.656651
Q8JHF6	Pyruvate carboxylase OS=Gallus gallus GN=PYC PE=2 SV=1 - [Q8JHF6_CHICK]	2658.36	0.6282	1	49	49	763	1178	127.2	6.71	0.103493	0.191718
F1NC26	Uncharacterized protein OS=Gallus gallus GN=HSPA4L PE=3 SV=1 - [F1NC26_CHICK]	596.81	0.2788	2	16	18	35	843	94.7	5.52	-0.0304734	0.511668
F1NAM7	Uncharacterized protein OS=Gallus gallus GN=BDH2 PE=4 SV=2 - [F1NAM7_CHICK]	383.7	0.4122	1	11	11	30	245	26.8	7.24	0.226884	0.0226371
E1BRP4	Uncharacterized protein OS=Gallus gallus GN=FAM160B1 PE=4 SV=2 - [E1BRP4_CHICK]	37.74	0.0103	1	1	1	3	777	88.1	5.3	0.00135637	0.992858
E1BY36	Uncharacterized protein OS=Gallus gallus GN=ASMTL PE=3 SV=2 - [E1BY36_CHICK]	440.57	0.2249	1	12	12	23	627	69.5	6.39	-0.0543543	0.262691
F1NHW3	Enhancer of rudimentary homolog OS=Gallus gallus GN=ERH PE=3 SV=1 - [F1NHW3_CHICK]	69.53	0.2692	2	2	2	3	104	12.3	5.92	0.07391	0.590908
F1NG65	Nucleoside diphosphate kinase (Fragment) OS=Gallus gallus GN=NME4 PE=3 SV=2 - [F1NG65_CHICK]	380.04	0.4794	1	2	8	112	194	21.4	9.6	-0.0754859	0.73381
O57536	Nucleoside diphosphate kinase (Fragment) OS=Gallus gallus GN=mNDPK PE=2 SV=1 - [O57536_CHICK]	467.61	0.6433	1	4	10	119	157	17.5	7.59	0.0165249	0.973128
F1NU56	Uncharacterized protein OS=Gallus gallus GN=RPS25 PE=4 SV=2 - [F1NU56_CHICK]	128.23	0.24	1	3	3	15	125	13.7	10.11	-0.0439434	0.87819
E1C2A1	Uncharacterized protein OS=Gallus gallus GN=ANP32A PE=4 SV=2 - [E1C2A1_CHICK]	195.53	0.2811	1	6	6	23	281	32.2	4.07	0.0436828	0.502889
E1BQD1	Uncharacterized protein (Fragment) OS=Gallus gallus GN=LOC418811 PE=4 SV=2 - [E1BQD1_CHICK]	406.56	0.476	1	8	9	44	250	26.4	6.9	0.0623344	0.634438
R4GIU0	Uncharacterized protein OS=Gallus gallus GN=LOC100859613 PE=4 SV=1 - [R4GIU0_CHICK]	172.29	0.2027	2	6	6	7	301	33.3	9.31	-0.094073	0.196687
F1NJF8	Alpha-N-acetylgalactosaminidase OS=Gallus gallus GN=NAGA PE=4 SV=2 - [F1NJF8_CHICK]	308.92	0.2635	2	9	9	23	425	47.4	6.77	0.153811	0.154324
Q6EE59	Ribosomal protein L4 (Fragment) OS=Gallus gallus PE=2 SV=1 - [Q6EE59_CHICK]	305.61	0.4179	2	11	11	39	280	31.8	10.98	-0.034723	0.914019
E1C805	Uncharacterized protein OS=Gallus gallus GN=HEATR1 PE=4 SV=2 - [E1C805_CHICK]	59.96	0.0103	1	2	2	3	2234	252.9	6.89	0.334378	0.0510453
F1NKS8	Uncharacterized protein OS=Gallus gallus GN=ADH6 PE=3 SV=2 - [F1NKS8_CHICK]	875.19	0.5745	1	1	18	307	369	39.2	7.84	-0.131382	0.168553
E1C866	Uncharacterized protein OS=Gallus gallus GN=Gga.50010 PE=4 SV=2 - [E1C866_CHICK]	798.89	0.2681	1	2	20	61	981	108.9	6.55	0.0415873	0.670037
Q5F3T4	Uncharacterized protein OS=Gallus gallus GN=RCJMB04_7j8 PE=2 SV=1 - [Q5F3T4_CHICK]	753.59	0.2601	1	1	19	59	938	104.1	7.05	0.121967	0.243448
R4GMF9	Uncharacterized protein (Fragment) OS=Gallus gallus GN=LOC100857616 PE=4 SV=1 - [R4GMF9_CHICK]	429.4	0.6723	1	7	7	94	177	17.9	5.45	-0.00231286	0.970755
F1NWG7	Uncharacterized protein OS=Gallus gallus GN=SIL1 PE=4 SV=2 - [F1NWG7_CHICK]	66.02	0.0493	1	2	2	2	467	52.2	5.69	0.138023	0.611088
Q90633	Complement C3 OS=Gallus gallus PE=2 SV=1 - [Q90633_CHICK]	1829.3	0.3662	1	13	50	169	1652	184	7.11	-0.0993714	0.355634
Q9I8D6	T-complex protein 1 subunit delta OS=Gallus gallus GN=tcp-1 delta PE=2 SV=1 - [Q9I8D6_CHICK]	777.48	0.472	2	18	19	55	536	57.7	7.8	-0.0290842	0.400077
F1NKP4	Phosphoenolpyruvate carboxykinase, cytosolic [GTP] OS=Gallus gallus GN=PCK1 PE=3 SV=1 - [F1NKP4_CHICK]	237.34	0.1399	3	7	8	14	622	69.5	6.37	0.355851	0.19547
E1BS15	Uncharacterized protein OS=Gallus gallus GN=ACSF2 PE=4 SV=2 - [E1BS15_CHICK]	1067.13	0.5523	1	27	27	132	621	68.7	8.7	0.0470763	0.438133
F1NS13	Uncharacterized protein OS=Gallus gallus GN=RNPEP PE=4 SV=2 - [F1NS13_CHICK]	577.28	0.3563	1	16	16	50	595	66.6	5.22	-0.0034617	0.95494
E1C4W4	Uncharacterized protein OS=Gallus gallus GN=ALDH7A1 PE=3 SV=1 - [E1C4W4_CHICK]	1090.46	0.5578	1	22	22	202	536	58	7.37	0.0106811	0.775362
F1NKX2	Uncharacterized protein OS=Gallus gallus GN=EDC4 PE=4 SV=2 - [F1NKX2_CHICK]	15.3	0.0064	1	1	1	1	1567	171.4	6.76	-0.0972294	0.228857
E1C8A2	Uncharacterized protein OS=Gallus gallus GN=SAMM50 PE=4 SV=1 - [E1C8A2_CHICK]	207.94	0.2239	1	7	7	8	469	52.2	6.4	-0.0726957	0.423642
F1NVJ0	4-hydroxyphenylpyruvate dioxygenase (Fragment) OS=Gallus gallus GN=HPD PE=3 SV=2 - [F1NVJ0_CHICK]	830.43	0.6997	1	22	22	133	393	44.9	6.9	0.0335839	0.862098
F1P0L8	Uncharacterized protein OS=Gallus gallus GN=LOC100857526 PE=3 SV=2 - [F1P0L8_CHICK]	211.25	0.1822	4	7	7	8	472	53.7	8.16	0.0805897	0.423442
E1C245	Uncharacterized protein OS=Gallus gallus GN=LOC100858718 PE=4 SV=2 - [E1C245_CHICK]	398.3	0.0355	3	14	14	15	5411	613.4	5.5	0.0856173	0.113714
E1BQR8	Uncharacterized protein OS=Gallus gallus GN=A1CF PE=4 SV=2 - [E1BQR8_CHICK]	432.08	0.3046	1	13	13	29	581	64	8.78	0.160264	0.109742
F1NLE7	Uncharacterized protein OS=Gallus gallus GN=AIMP1 PE=4 SV=2 - [F1NLE7_CHICK]	172.59	0.1763	1	4	5	12	329	35.9	8.7	0.105716	0.531276
F1NNZ9	Protein kinase C and casein kinase substrate in neurons protein 2 OS=Gallus gallus GN=PACSIN2 PE=2 SV=1 - [F1NNZ9_CHICK]	340.24	0.222	3	10	10	21	446	51.7	5.34	-0.012713	0.795804
F1NEK9	Uncharacterized protein (Fragment) OS=Gallus gallus GN=ACMSD PE=4 SV=1 - [F1NEK9_CHICK]	46.03	0.0787	1	2	2	2	343	39	7.03	0.0947021	0.54476
F1P188	3-hydroxyisobutyryl-CoA hydrolase, mitochondrial OS=Gallus gallus GN=HIBCH PE=4 SV=1 - [F1P188_CHICK]	521.06	0.426	2	15	15	72	385	42.8	8.44	0.136904	0.0711433
F1NQD9	Radixin (Fragment) OS=Gallus gallus GN=RDX PE=4 SV=2 - [F1NQD9_CHICK]	532.07	0.3093	3	9	16	49	582	68.4	6.18	0.0925147	0.0868293
E1BV34	Uncharacterized protein OS=Gallus gallus GN=Gga.3145 PE=4 SV=1 - [E1BV34_CHICK]	780.35	0.4021	2	16	23	75	582	68.5	6.37	-0.0379029	0.625486
F1NZ78	Alpha-enolase OS=Gallus gallus GN=ENO1 PE=3 SV=2 - [F1NZ78_CHICK]	1508.81	0.7304	3	20	30	1485	434	47.3	6.8	0.240784	0.120803
F1NG74	Gamma-enolase OS=Gallus gallus GN=ENO2 PE=3 SV=1 - [F1NG74_CHICK]	466.88	0.2512	2	2	10	562	434	47.3	4.94	0.380542	0.147197
Q5ZIQ5	Uncharacterized protein OS=Gallus gallus GN=RCJMB04_24e8 PE=2 SV=1 - [Q5ZIQ5_CHICK]	352.48	0.3213	1	2	9	48	361	41.4	6.61	0.0528658	0.528527
F1NPM6	Uncharacterized protein OS=Gallus gallus GN=NDUFA10 PE=4 SV=1 - [F1NPM6_CHICK]	337.76	0.3047	1	1	8	46	361	41.4	6.34	-0.145161	0.292888
R4GL80	Uncharacterized protein (Fragment) OS=Gallus gallus PE=4 SV=1 - [R4GL80_CHICK]	215.37	0.2222	1	5	5	12	243	26.3	5.27	0.0244077	0.79776
F1NBF8	Uncharacterized protein OS=Gallus gallus GN=FAM82B PE=4 SV=2 - [F1NBF8_CHICK]	597.67	0.5196	1	14	14	54	306	34.4	7.83	0.114616	0.647851
E1BRY8	Uncharacterized protein OS=Gallus gallus GN=ATAD3A PE=4 SV=2 - [E1BRY8_CHICK]	177.96	0.1118	1	6	6	7	635	70.4	9.23	-0.0706276	0.465587
O73840	Heparin cofactor II (Fragment) OS=Gallus gallus PE=2 SV=1 - [O73840_CHICK]	117.44	0.1353	2	6	6	7	473	54.1	6.28	0.13273	0.267519
E1C902	Uncharacterized protein OS=Gallus gallus GN=GALK2 PE=3 SV=2 - [E1C902_CHICK]	270.43	0.2162	2	7	7	16	458	50.1	6.76	0.0094252	0.858093
E1C7T4	Uncharacterized protein OS=Gallus gallus GN=PRELP PE=4 SV=1 - [E1C7T4_CHICK]	263.14	0.3396	1	10	10	25	374	42.9	8.95	-0.124205	0.421734
E1C1N7	Uncharacterized protein OS=Gallus gallus GN=LOC100858915 PE=4 SV=2 - [E1C1N7_CHICK]	34.11	0.0094	1	1	1	2	1388	157.3	4.69	-0.0945638	0.288551
F1NY82	Uncharacterized protein OS=Gallus gallus GN=IQGAP1 PE=4 SV=2 - [F1NY82_CHICK]	281.51	0.0628	1	4	7	12	1401	159.5	6.33	-0.0230029	0.546764
F1NYI8	Lon protease homolog 2, peroxisomal OS=Gallus gallus GN=LONP2 PE=3 SV=2 - [F1NYI8_CHICK]	107.3	0.0505	1	3	3	4	852	94.6	6.9	-0.091183	0.567019
A5HUM6	Tenascin X B OS=Gallus gallus GN=TNXB PE=4 SV=1 - [A5HUM6_CHICK]	27.21	0.0428	3	1	1	1	2104	226.9	6.38	#NUM!	#NUM!
R9PXN1	Eukaryotic initiation factor 4A-II OS=Gallus gallus GN=EIF4A2 PE=4 SV=1 - [R9PXN1_CHICK]	542.87	0.5263	2	13	15	77	380	43.5	5.48	0.00310881	0.943718
F1NYM3	Uncharacterized protein (Fragment) OS=Gallus gallus GN=NDUFS7 PE=3 SV=2 - [F1NYM3_CHICK]	278.54	0.4136	1	6	6	22	220	24.3	9.74	0.0631669	0.69424
F1NYK3	Uncharacterized protein OS=Gallus gallus GN=MCCC1 PE=4 SV=1 - [F1NYK3_CHICK]	475.9	0.2679	2	13	13	31	713	78.5	6.99	-0.00123823	0.981312
E1C1D1	Annexin OS=Gallus gallus GN=ANXA7 PE=3 SV=2 - [E1C1D1_CHICK]	392	0.2462	1	10	10	20	459	49.3	5.91	-0.0123558	0.626772
R4GIW4	Uncharacterized protein OS=Gallus gallus GN=XPNPEP2 PE=4 SV=1 - [R4GIW4_CHICK]	211.77	0.0925	1	5	5	9	681	75.7	5.36	0.142719	0.380528
F1NY05	Hypoxia up-regulated protein 1 (Fragment) OS=Gallus gallus GN=HYOU1 PE=3 SV=2 - [F1NY05_CHICK]	839.65	0.3503	2	23	23	59	965	108.3	5.17	0.0308199	0.777128
F6R1X6	Uncharacterized protein OS=Gallus gallus GN=SSB PE=4 SV=1 - [F6R1X6_CHICK]	165.03	0.1807	3	6	6	12	404	46.3	8.22	0.0733669	0.428485
F1NGB1	Uncharacterized protein OS=Gallus gallus GN=NUCB2 PE=4 SV=1 - [F1NGB1_CHICK]	482.44	0.3407	2	13	13	35	455	53.8	5.15	0.014237	0.924164
F1NMC3	Uncharacterized protein OS=Gallus gallus GN=MTHFD1 PE=3 SV=1 - [F1NMC3_CHICK]	2345.76	0.6599	2	49	49	398	935	100.2	8.5	0.0115133	0.834391
E1BST9	Uncharacterized protein OS=Gallus gallus PE=4 SV=2 - [E1BST9_CHICK]	506.59	0.3672	1	13	13	27	482	52.3	5.99	-0.1118	0.173806
Q5ZLG7	Uncharacterized protein OS=Gallus gallus GN=RCJMB04_6e4 PE=2 SV=1 - [Q5ZLG7_CHICK]	667.22	0.4463	3	5	12	159	298	32.7	9.72	-0.0362053	0.762539
F1NIJ6	Glucose-6-phosphate isomerase OS=Gallus gallus GN=GPI PE=2 SV=1 - [F1NIJ6_CHICK]	888.84	0.3978	2	20	20	184	553	62.1	7.96	0.0768308	0.243907
E1BRT9	Uncharacterized protein OS=Gallus gallus GN=NDUFA5 PE=4 SV=1 - [E1BRT9_CHICK]	165.01	0.5086	1	4	4	13	116	13.4	7.25	0.0966147	0.537367
F1P0C8	Uncharacterized protein (Fragment) OS=Gallus gallus GN=SLC25A1 PE=3 SV=1 - [F1P0C8_CHICK]	614.91	0.5584	1	17	17	96	317	34.6	9.54	0.0075172	0.946901
H9L385	Hemopexin (Fragment) OS=Gallus gallus GN=HPX PE=4 SV=2 - [H9L385_CHICK]	510.85	0.5245	2	13	13	67	408	45.4	5.34	-0.104773	0.601974
F1NCZ2	Uncharacterized protein OS=Gallus gallus GN=GDI2 PE=4 SV=2 - [F1NCZ2_CHICK]	898.38	0.5804	2	21	21	122	448	50.7	5.44	0.068351	0.225274
F1N8M4	Dynamin-like 120 kDa protein, mitochondrial OS=Gallus gallus GN=OPA1 PE=3 SV=1 - [F1N8M4_CHICK]	412.56	0.1198	3	10	10	18	977	113.3	8.07	-0.0610735	0.455601
F1NKL4	Uncharacterized protein OS=Gallus gallus GN=DYNC1H1 PE=4 SV=2 - [F1NKL4_CHICK]	1709.59	0.1597	2	51	51	89	4577	525.5	6.48	-0.0107031	0.797836
F1P0V5	Uncharacterized protein (Fragment) OS=Gallus gallus GN=ABCF3 PE=3 SV=1 - [F1P0V5_CHICK]	12.52	0.0126	1	1	1	1	714	80.3	6.14	-0.121163	0.500201
Q5H7M6	DRG1 (Fragment) OS=Gallus gallus GN=drg1 PE=2 SV=1 - [Q5H7M6_CHICK]	52.89	0.0856	2	1	1	3	187	20.7	7.83	-0.0858342	0.471441
E1BYB1	Uncharacterized protein OS=Gallus gallus GN=BCL2L14 PE=4 SV=2 - [E1BYB1_CHICK]	92.32	0.086	1	3	3	7	349	40.1	5.19	0.0352232	0.365403
F1N9T0	Hydroxymethylglutaryl-CoA synthase, cytoplasmic OS=Gallus gallus GN=HMGCS1 PE=2 SV=1 - [F1N9T0_CHICK]	769.97	0.3946	2	18	18	100	522	57.6	5.74	-0.0614399	0.301897
E1BRS7	Uncharacterized protein OS=Gallus gallus PE=4 SV=1 - [E1BRS7_CHICK]	50.76	0.022	1	2	2	2	1683	188.1	6.87	-0.171514	0.277583
E1C4T6	Uncharacterized protein (Fragment) OS=Gallus gallus GN=SPEN PE=4 SV=2 - [E1C4T6_CHICK]	31.19	0.0022	1	1	1	4	3577	397.1	7.31	-0.00486884	0.987279
F1NSS0	Uncharacterized protein (Fragment) OS=Gallus gallus GN=SPTB PE=4 SV=2 - [F1NSS0_CHICK]	135.5	0.0318	1	5	6	9	2324	265.4	5.94	-0.279828	0.130746
F1NCR3	Cytosolic purine 5'-nucleotidase OS=Gallus gallus GN=NT5C2 PE=3 SV=1 - [F1NCR3_CHICK]	289.02	0.2127	2	10	10	24	569	65.9	5.49	-0.0162227	0.687849
E1C4Q3	Uncharacterized protein (Fragment) OS=Gallus gallus GN=PDXDC1 PE=3 SV=2 - [E1C4Q3_CHICK]	16.25	0.0189	1	1	1	1	794	88.6	5.16	0.136016	0.0331196
F1NB52	Coatomer subunit gamma OS=Gallus gallus GN=COPG PE=3 SV=1 - [F1NB52_CHICK]	628.61	0.2998	2	15	17	47	874	97.5	5.45	-0.00842313	0.884728
E1C7T8	Coatomer subunit gamma OS=Gallus gallus GN=COPG2 PE=3 SV=1 - [E1C7T8_CHICK]	304.69	0.1297	1	6	8	15	871	97.5	5.69	-0.122871	0.0924594
Q5ZMJ0	Peptidyl-prolyl cis-trans isomerase OS=Gallus gallus GN=PPIF PE=2 SV=1 - [Q5ZMJ0_CHICK]	283.52	0.451	1	8	9	26	204	21.7	8.98	0.186932	0.232988
E1BUM0	Peptidyl-prolyl cis-trans isomerase E OS=Gallus gallus GN=PPIE PE=3 SV=1 - [E1BUM0_CHICK]	168.52	0.2757	1	5	6	10	301	33.3	5.6	0.000620801	0.985137
F1NUE0	Uncharacterized protein OS=Gallus gallus GN=SRI PE=4 SV=1 - [F1NUE0_CHICK]	110.61	0.1667	2	3	3	8	198	21.8	5.6	-0.0310994	0.704994
F1NSS4	Non-specific lipid-transfer protein (Fragment) OS=Gallus gallus GN=SCP2 PE=4 SV=2 - [F1NSS4_CHICK]	970.73	0.5493	1	3	24	139	548	58.8	8.34	0.197378	0.0213121
F1NYB5	Uncharacterized protein OS=Gallus gallus GN=TSTA3 PE=3 SV=2 - [F1NYB5_CHICK]	149.97	0.1146	1	3	3	6	323	36.4	7.33	0.0433205	0.682742
G1K338	Uncharacterized protein OS=Gallus gallus GN=LOC768337 PE=3 SV=1 - [G1K338_CHICK]	683.19	0.4764	3	1	15	131	445	49.9	4.89	-0.331936	0.0809938
E1BXL5	Uncharacterized protein (Fragment) OS=Gallus gallus GN=LOC100859686 PE=4 SV=2 - [E1BXL5_CHICK]	129.41	0.1332	1	4	4	4	443	49.7	6.9	0.0488064	0.620579
E1BT94	Uncharacterized protein OS=Gallus gallus GN=NDUFB6 PE=4 SV=1 - [E1BT94_CHICK]	226.65	0.6484	1	7	7	12	128	14.9	9.74	0.108787	0.494653
F1NRI3	WD repeat-containing protein 1 OS=Gallus gallus GN=WDR1 PE=4 SV=2 - [F1NRI3_CHICK]	460.95	0.3662	2	15	15	30	609	66.5	6.67	0.033671	0.533526
F1NA86	Uncharacterized protein OS=Gallus gallus GN=SQSTM1 PE=4 SV=2 - [F1NA86_CHICK]	43.56	0.0221	1	1	1	1	452	49.7	4.96	#NUM!	#NUM!
Q5ZI00	Uncharacterized protein OS=Gallus gallus GN=NDUFA9 PE=2 SV=1 - [Q5ZI00_CHICK]	502.34	0.4497	1	13	13	38	378	43.1	9.38	-0.0103221	0.929142
E1C333	Uncharacterized protein OS=Gallus gallus GN=FAAH PE=4 SV=1 - [E1C333_CHICK]	613.76	0.5434	1	18	18	46	576	64.1	7.52	-0.041875	0.496305
F1NEF7	Uncharacterized protein OS=Gallus gallus GN=LECT2 PE=4 SV=2 - [F1NEF7_CHICK]	498.96	0.3385	2	9	9	63	322	35.2	8.84	-0.00368857	0.949177
A3RKL3	Dihydrofolate reductase OS=Gallus gallus GN=DHFR PE=2 SV=1 - [A3RKL3_CHICK]	329.83	0.5789	2	1	10	30	190	21.8	8.5	0.232301	0.050028
Q5ZMG7	Uncharacterized protein OS=Gallus gallus GN=AP1M1 PE=2 SV=1 - [Q5ZMG7_CHICK]	106.27	0.1371	2	4	4	7	423	48.5	7.3	-0.10614	0.153037
R4GKA6	Collagen alpha-2(VI) chain OS=Gallus gallus GN=COL6A2 PE=4 SV=1 - [R4GKA6_CHICK]	587.22	0.2453	2	15	15	49	950	102.4	5.48	-0.15355	0.24275
E1BUZ0	Uncharacterized protein OS=Gallus gallus GN=NDUFV2 PE=3 SV=2 - [E1BUZ0_CHICK]	513.87	0.5976	1	12	12	69	246	27.1	8.22	0.121135	0.0395635
H9KZV9	Uncharacterized protein OS=Gallus gallus PE=4 SV=2 - [H9KZV9_CHICK]	232.75	0.1101	1	7	7	10	1008	109.8	5.55	-0.245404	0.0977449
R4GJS6	Uncharacterized protein OS=Gallus gallus GN=C3 PE=4 SV=1 - [R4GJS6_CHICK]	1668.3	0.4959	5	11	48	151	1355	151.1	7.5	-0.0377366	0.479719
F1NQ86	Acyl-CoA dehydrogenase family member 11 OS=Gallus gallus GN=ACAD11 PE=2 SV=1 - [F1NQ86_CHICK]	575.51	0.2802	1	2	15	35	778	87.1	8.15	0.0531509	0.713881
D0EKR3	Peptidyl-prolyl cis-trans isomerase OS=Gallus gallus PE=2 SV=1 - [D0EKR3_CHICK]	443.43	0.5152	3	11	11	204	165	17.8	8.09	0.152377	0.286851
F1P3J2	Uncharacterized protein OS=Gallus gallus GN=IFIT5 PE=4 SV=2 - [F1P3J2_CHICK]	132.87	0.0856	1	3	3	4	479	56.3	5.78	-0.822737	0.174523
F1NV49	ATP-dependent RNA helicase DDX1 OS=Gallus gallus GN=DDX1 PE=2 SV=2 - [F1NV49_CHICK]	369.54	0.173	2	9	9	13	734	81.8	7.27	-0.010532	0.835173
E1BTQ9	Uncharacterized protein OS=Gallus gallus GN=AUH PE=2 SV=2 - [E1BTQ9_CHICK]	317.43	0.3436	1	9	9	26	326	34.3	9.2	0.0577465	0.198647
F1NII7	Uncharacterized protein OS=Gallus gallus GN=FBN1 PE=4 SV=2 - [F1NII7_CHICK]	299.9	0.043	3	8	9	12	2768	301.1	4.87	-0.192952	0.279011
E1BYF8	Uncharacterized protein (Fragment) OS=Gallus gallus GN=FNBP1 PE=4 SV=2 - [E1BYF8_CHICK]	84.56	0.047	1	3	3	6	617	71.3	5.72	0.115597	0.366098
A8DC32	Microsomal triglyceride transfer protein large subunit OS=Gallus gallus GN=MTP PE=2 SV=1 - [A8DC32_CHICK]	1457.55	0.5412	3	36	36	161	1177	131.6	8.69	-0.0835636	0.542867
Q5F4A4	Inosine-5'-monophosphate dehydrogenase OS=Gallus gallus GN=RCJMB04_1j11 PE=2 SV=1 - [Q5F4A4_CHICK]	226.66	0.179	1	5	5	10	514	55.5	7.03	-0.0844815	0.202
H9L167	Uncharacterized protein (Fragment) OS=Gallus gallus GN=ETHE1 PE=4 SV=1 - [H9L167_CHICK]	280.23	0.6542	1	6	6	43	107	11.7	7.34	-0.0199639	0.714168
F1NX57	Uncharacterized protein (Fragment) OS=Gallus gallus GN=GRHPR PE=3 SV=2 - [F1NX57_CHICK]	820.51	0.6328	1	16	16	124	335	36	8.29	0.130835	0.00396259
F1NBX1	Regucalcin OS=Gallus gallus GN=RGN PE=4 SV=1 - [F1NBX1_CHICK]	947.67	0.7826	2	24	24	206	299	33.2	6.07	0.241569	0.150622
F1P0X7	Uncharacterized protein OS=Gallus gallus GN=CASP1 PE=3 SV=2 - [F1P0X7_CHICK]	82.94	0.0636	2	2	2	6	283	32.6	8.66	-0.138363	0.450678
Q5ZJQ5	Uncharacterized protein OS=Gallus gallus GN=RCJMB04_16g5 PE=2 SV=1 - [Q5ZJQ5_CHICK]	423.91	0.3618	2	14	14	26	503	57.2	6.49	0.0400595	0.379629
E1C6H2	Uncharacterized protein OS=Gallus gallus GN=FLII PE=4 SV=2 - [E1C6H2_CHICK]	131.26	0.0348	2	3	3	5	1265	144.8	5.88	-0.0395217	0.550022
E1C0L2	Uncharacterized protein OS=Gallus gallus GN=HAAO PE=3 SV=2 - [E1C0L2_CHICK]	298.58	0.486	1	10	10	34	286	33.1	6.18	0.00471171	0.977192
F1NWP3	Heat shock cognate 71 kDa protein OS=Gallus gallus GN=HSPA8 PE=2 SV=1 - [F1NWP3_CHICK]	1460.92	0.5186	3	19	30	239	646	70.8	5.52	-0.0192838	0.715621
F1N9B7	Uncharacterized protein OS=Gallus gallus GN=RAD23B PE=4 SV=2 - [F1N9B7_CHICK]	81.61	0.0968	1	3	3	7	403	43.1	4.75	0.104209	0.268549
R4GLZ7	Uncharacterized protein OS=Gallus gallus GN=LOC100859241 PE=4 SV=1 - [R4GLZ7_CHICK]	51.65	0.0841	1	1	1	5	214	24	4.23	0.0179154	0.53039
F1NZM1	Eukaryotic translation initiation factor 3 subunit E OS=Gallus gallus GN=EIF3E PE=3 SV=1 - [F1NZM1_CHICK]	125.11	0.1236	2	5	5	7	445	52.1	6.04	0.0194688	0.77172
F1NNR1	Uncharacterized protein OS=Gallus gallus GN=UGP2 PE=4 SV=1 - [F1NNR1_CHICK]	1250.85	0.5709	3	29	29	253	508	56.8	8.34	0.0992925	0.219948
O57579	Aminopeptidase N OS=Gallus gallus GN=ANPEP PE=1 SV=1 - [AMPN_CHICK]	689.23	0.2378	4	16	16	50	967	108.6	5.2	-0.0856182	0.0412198
F1NZ86	Stress-70 protein, mitochondrial OS=Gallus gallus GN=HSPA9 PE=3 SV=1 - [F1NZ86_CHICK]	1325.14	0.4844	2	30	30	190	675	73.1	6.43	0.080336	0.300328
F1NX22	Collagen alpha-1(XII) chain OS=Gallus gallus GN=COL12A1 PE=4 SV=2 - [F1NX22_CHICK]	1105.01	0.1619	3	34	34	55	3119	339.6	5.41	-0.247925	0.185248
E1C0F3	Uncharacterized protein OS=Gallus gallus GN=RAB7A PE=3 SV=1 - [E1C0F3_CHICK]	412.86	0.5459	1	10	10	33	207	23.5	6.7	-0.0715351	0.0869006
F1NYG7	Uncharacterized protein OS=Gallus gallus GN=HACL1 PE=3 SV=2 - [F1NYG7_CHICK]	288.03	0.1866	1	8	8	18	568	62	7.21	0.0877193	0.11075
F1NA76	Uncharacterized protein OS=Gallus gallus GN=TMED10 PE=3 SV=1 - [F1NA76_CHICK]	239.25	0.3699	2	6	6	15	219	24.8	7.78	-0.0772503	0.282941
Q5ZJL5	Adenylosuccinate synthetase isozyme 2 OS=Gallus gallus GN=ADSS PE=2 SV=1 - [PURA2_CHICK]	138.09	0.1175	2	3	4	7	451	49.4	6.32	0.0495524	0.633811
F1NVD4	Adenylosuccinate synthetase (Fragment) OS=Gallus gallus GN=ADSSL1 PE=3 SV=2 - [F1NVD4_CHICK]	174.31	0.1697	1	4	5	10	442	48.8	7.96	-0.0127289	0.861615
R4GJK8	Uncharacterized protein OS=Gallus gallus GN=LOC100857226 PE=4 SV=1 - [R4GJK8_CHICK]	649.03	0.4904	3	20	20	63	471	52.4	6.64	0.000149285	0.998313
I3VQH4	Interleukin enhancer binding factor 3-like protein OS=Gallus gallus GN=ILF3 PE=2 SV=1 - [I3VQH4_CHICK]	68.74	0.0269	2	3	3	3	893	95	8.81	0.024933	0.491253
F1NU90	Leucine-rich repeat-containing protein 59 OS=Gallus gallus GN=LRRC59 PE=4 SV=1 - [F1NU90_CHICK]	126.09	0.1298	2	4	4	12	339	38.7	9.23	0.131078	0.306968
E1BZ03	Adenylyl cyclase-associated protein OS=Gallus gallus GN=CAP2 PE=3 SV=1 - [E1BZ03_CHICK]	31.36	0.0146	1	1	1	2	480	53.2	6.8	0.00862109	0.980572
F1NWQ6	Agrin OS=Gallus gallus GN=AGRN PE=4 SV=2 - [F1NWQ6_CHICK]	123.72	0.0174	3	3	3	4	2065	223	6.68	-0.00517651	0.944588
R9PXN5	Alpha-actinin-1 (Fragment) OS=Gallus gallus GN=ACTN1 PE=4 SV=1 - [R9PXN5_CHICK]	1327.68	0.4408	9	19	31	137	878	101.5	5.48	-0.0774585	0.310871
F1N8J0	Uncharacterized protein OS=Gallus gallus GN=ACAA2 PE=3 SV=1 - [F1N8J0_CHICK]	972.64	0.7053	2	22	22	356	397	41.6	7.88	0.0345656	0.663592
H9L3J8	Uncharacterized protein OS=Gallus gallus GN=UBAP2L PE=4 SV=2 - [H9L3J8_CHICK]	20.4	0.0072	1	1	1	1	1107	116.3	7.08	0.26767	0.112623
R4GL60	Uncharacterized protein OS=Gallus gallus GN=CLINT1 PE=4 SV=1 - [R4GL60_CHICK]	124.09	0.0804	3	3	3	3	597	66	6.77	-0.0424398	0.422807
E1BW57	Uncharacterized protein OS=Gallus gallus GN=NUDT5 PE=3 SV=2 - [E1BW57_CHICK]	341.14	0.3132	1	7	7	82	182	19.9	5.3	0.102972	0.273357
F1P4B2	Protein piccolo (Fragment) OS=Gallus gallus GN=PCLO PE=4 SV=2 - [F1P4B2_CHICK]	29.76	0.0014	2	1	1	1	5118	560.2	6.77	0.372795	0.121007
F1NIP2	Uncharacterized protein OS=Gallus gallus GN=COQ7 PE=4 SV=2 - [F1NIP2_CHICK]	58.64	0.1284	1	2	2	3	218	23.9	7.81	0.0942356	0.589885
F1N823	Uncharacterized protein (Fragment) OS=Gallus gallus GN=PDHB PE=4 SV=1 - [F1N823_CHICK]	809.72	0.5389	1	15	15	170	360	39	6.55	0.108561	0.207979
F1NBA8	Uncharacterized protein (Fragment) OS=Gallus gallus GN=IPO7 PE=4 SV=2 - [F1NBA8_CHICK]	153.73	0.0673	1	5	5	6	1010	116.2	4.79	0.0359081	0.184335
F1N8G6	Uncharacterized protein OS=Gallus gallus GN=TINAGL1 PE=3 SV=2 - [F1N8G6_CHICK]	37.64	0.0539	1	2	2	2	464	51.6	6.8	-0.346119	0.229592
F1NFW0	Uncharacterized protein OS=Gallus gallus GN=SNX6 PE=4 SV=2 - [F1NFW0_CHICK]	192.16	0.163	2	6	6	10	405	46.4	6.16	-0.013165	0.490757
F1NY51	Uncharacterized protein OS=Gallus gallus GN=UCHL3 PE=4 SV=1 - [F1NY51_CHICK]	148.5	0.2043	2	4	4	10	230	26.3	4.98	0.154944	0.0895522
F1NQU7	Eukaryotic translation initiation factor 4 gamma 2 (Fragment) OS=Gallus gallus GN=EIF4G2 PE=2 SV=1 - [F1NQU7_CHICK]	85.97	0.0382	3	3	3	3	864	97.5	7.02	-0.0818106	0.109153
Q9PTD6	40S ribosomal protein S6 (Fragment) OS=Gallus gallus PE=2 SV=1 - [Q9PTD6_CHICK]	244.57	0.332	3	8	8	24	247	28.4	10.83	0.0253093	0.926303
F1P4V1	Fibrinogen alpha chain OS=Gallus gallus GN=FGA PE=4 SV=1 - [F1P4V1_CHICK]	655.2	0.3009	4	15	16	80	741	82.3	6.06	-0.411089	0.13575
F1NGH1	Uncharacterized protein (Fragment) OS=Gallus gallus GN=PITPNB PE=4 SV=1 - [F1NGH1_CHICK]	98.87	0.2189	4	3	5	8	265	30.8	6.06	-0.125599	0.00651536
E1C2B6	Coronin OS=Gallus gallus GN=CORO2B PE=3 SV=2 - [E1C2B6_CHICK]	42.03	0.0253	3	1	2	2	475	54.3	8.18	0.257727	0.0986826
Q5ZJA7	Uncharacterized protein OS=Gallus gallus GN=OGDH PE=2 SV=1 - [Q5ZJA7_CHICK]	503.31	0.1762	2	14	14	34	1016	115.1	7.02	0.0262589	0.626984
Q5ZK02	Uncharacterized protein OS=Gallus gallus GN=RCJMB04_14a17 PE=4 SV=1 - [Q5ZK02_CHICK]	110.11	0.1949	1	1	3	11	118	12.8	4.83	0.565756	0.0762475
R4GKF1	Uncharacterized protein OS=Gallus gallus GN=LOC777348 PE=4 SV=1 - [R4GKF1_CHICK]	298.87	0.3273	1	8	8	18	333	35.9	7.47	-0.307988	0.0796775
R4GID9	Uncharacterized protein OS=Gallus gallus GN=CCT3 PE=4 SV=1 - [R4GID9_CHICK]	261.54	0.4636	1	5	5	28	151	16.2	6.93	-0.00862558	0.883671
E1C3A9	Vigilin OS=Gallus gallus GN=HDLBP PE=4 SV=1 - [E1C3A9_CHICK]	1047.69	0.3149	2	35	35	83	1267	141.5	6.83	0.00742835	0.923634
F1NFT8	WD repeat-containing protein 61 OS=Gallus gallus GN=WDR61 PE=4 SV=1 - [F1NFT8_CHICK]	158.58	0.1443	2	3	3	8	305	33.3	5.47	0.024398	0.811707
F1NFF7	Uncharacterized protein OS=Gallus gallus GN=LOC422046 PE=3 SV=2 - [F1NFF7_CHICK]	906.16	0.5769	2	21	22	86	494	56.1	8.7	0.225323	0.201644
Q5ZME1	Uncharacterized protein OS=Gallus gallus GN=HNRNPA2B1 PE=2 SV=1 - [Q5ZME1_CHICK]	457.55	0.2894	2	9	12	62	349	37	8.65	0.0812668	0.314908
F1NAF3	Uncharacterized protein OS=Gallus gallus GN=NDUFS8 PE=3 SV=2 - [F1NAF3_CHICK]	199.96	0.2344	1	4	4	16	209	23.8	6.07	-0.0770218	0.0521392
Q5ZKJ2	Uncharacterized protein OS=Gallus gallus GN=YWHAH PE=2 SV=1 - [Q5ZKJ2_CHICK]	160.17	0.1903	4	2	4	31	247	28.3	4.89	-0.171087	0.147553
F1NMY1	14-3-3 protein gamma (Fragment) OS=Gallus gallus GN=YWHAG PE=3 SV=2 - [F1NMY1_CHICK]	321.83	0.3578	4	2	8	45	218	24.9	4.86	0.0385377	0.706401
Q5ZK81	Uncharacterized protein OS=Gallus gallus GN=RCJMB04_12i19 PE=2 SV=1 - [Q5ZK81_CHICK]	541.3	0.5936	3	15	15	92	374	39.6	7.83	0.111541	0.125965
F1NU40	Nucleolin OS=Gallus gallus GN=NCL PE=4 SV=2 - [F1NU40_CHICK]	573.07	0.2533	3	18	18	67	691	75.4	4.92	0.0367344	0.706886
E1C0F1	Dolichyl-diphosphooligosaccharide--protein glycosyltransferase subunit 1 (Fragment) OS=Gallus gallus GN=RPN1 PE=4 SV=2 - [E1C0F1_CHICK]	730.86	0.3729	2	18	18	75	531	60.6	6.89	0.0333186	0.855442
E1BUJ1	Uncharacterized protein OS=Gallus gallus GN=RBM17 PE=4 SV=2 - [E1BUJ1_CHICK]	57.14	0.02	1	1	1	1	401	44.8	5.96	0.104589	0.232567
F1NE33	Formimidoyltransferase-cyclodeaminase OS=Gallus gallus GN=FTCD PE=4 SV=1 - [F1NE33_CHICK]	1007.97	0.6303	2	23	23	111	541	59.1	6.19	0.175421	0.0634148
Q5ZIZ5	Uncharacterized protein OS=Gallus gallus GN=NONO PE=2 SV=1 - [Q5ZIZ5_CHICK]	225.47	0.1818	1	6	7	16	473	54	8.82	-0.0349583	0.566337
F1P555	Uncharacterized protein OS=Gallus gallus GN=SFPQ PE=4 SV=2 - [F1P555_CHICK]	313.32	0.1808	2	7	8	29	647	69.5	9.47	0.0630502	0.602457
Q9PS89	Protein Wnt (Fragment) OS=Gallus gallus PE=2 SV=1 - [Q9PS89_CHICK]	31.43	0.0667	2	1	1	2	120	13.2	5.88	0.0132212	0.897253
F1N9J7	Uncharacterized protein OS=Gallus gallus GN=LOC100859737 PE=3 SV=1 - [F1N9J7_CHICK]	738.16	0.4378	3	1	15	109	450	50	5.06	-0.0722098	0.675788
F1NXR6	Uncharacterized protein OS=Gallus gallus GN=LOC100857858 PE=3 SV=2 - [F1NXR6_CHICK]	882.42	0.4389	11	3	17	161	458	51	5.06	-0.0697499	0.519544
D0VX29	Mitochondrial ubiquinol-cytochrome-c reductase complex core protein 2 OS=Gallus gallus PE=1 SV=1 - [D0VX29_CHICK]	836.33	0.5918	2	19	19	115	441	46.6	8.12	0.0612779	0.17538
F1NT58	Uncharacterized protein OS=Gallus gallus GN=DIABLO PE=4 SV=2 - [F1NT58_CHICK]	69.32	0.0868	1	2	2	4	242	26.3	7.28	-0.0598111	0.700207
R4GFX0	Uncharacterized protein (Fragment) OS=Gallus gallus GN=LOC100859320 PE=4 SV=1 - [R4GFX0_CHICK]	38.5	0.1111	1	1	1	2	63	7.6	5.38	0.12565	0.522156
F1NGR3	Uncharacterized protein OS=Gallus gallus GN=LOC415664 PE=3 SV=2 - [F1NGR3_CHICK]	230	0.375	1	6	7	24	256	27.4	8.95	0.218651	0.0745239
F1N9C1	Uncharacterized protein OS=Gallus gallus GN=LOC415661 PE=3 SV=2 - [F1N9C1_CHICK]	524.14	0.7992	1	11	15	47	259	27.9	8.53	0.107889	0.324067
F1NKK6	Succinate dehydrogenase [ubiquinone] cytochrome b small subunit, mitochondrial OS=Gallus gallus GN=SDHD PE=4 SV=2 - [F1NKK6_CHICK]	49.81	0.051	2	1	1	6	157	16.4	9.41	0.0726888	0.604009
R4GLG2	Uncharacterized protein OS=Gallus gallus GN=SLC25A20 PE=3 SV=1 - [R4GLG2_CHICK]	498.05	0.6611	1	13	13	39	301	32.8	9.44	0.0111648	0.884635
R4GLT3	Uncharacterized protein OS=Gallus gallus GN=GCHFR PE=4 SV=1 - [R4GLT3_CHICK]	37.21	0.2143	1	1	1	2	84	9.6	6.76	0.0553086	0.599244
E1BVK8	Uncharacterized protein OS=Gallus gallus GN=ACOT8 PE=4 SV=2 - [E1BVK8_CHICK]	45.9	0.0457	1	2	2	2	372	41.4	8.76	0.000187426	0.998734
E1C8Y3	Uncharacterized protein (Fragment) OS=Gallus gallus GN=ARPC3 PE=4 SV=2 - [E1C8Y3_CHICK]	187.52	0.2151	1	5	5	14	186	21.3	8.48	-0.0950876	0.53657
Q5ZL50	Profilin OS=Gallus gallus GN=RCJMB04_7m18 PE=2 SV=1 - [Q5ZL50_CHICK]	196.18	0.4357	2	4	4	25	140	15	6.99	0.121947	0.143902
E1BR45	Uncharacterized protein OS=Gallus gallus GN=TLN2 PE=4 SV=2 - [E1BR45_CHICK]	484.94	0.0854	1	8	16	30	2542	271.6	5.55	-0.00987332	0.79801
F1NVA4	Nucleophosmin (Fragment) OS=Gallus gallus GN=NPM1 PE=2 SV=2 - [F1NVA4_CHICK]	273.06	0.3636	4	8	8	54	275	30.3	4.84	0.14598	0.132197
F1NK96	Uncharacterized protein OS=Gallus gallus GN=PDIA6 PE=2 SV=1 - [F1NK96_CHICK]	816.19	0.5503	2	16	16	102	447	48.8	5.19	0.017108	0.69795
F1NY37	Acyl-coenzyme A oxidase OS=Gallus gallus GN=ACOX1 PE=3 SV=1 - [F1NY37_CHICK]	818.65	0.4547	2	20	20	100	662	74.5	7.37	0.0833947	0.293679
E1C319	Uncharacterized protein OS=Gallus gallus GN=STX12 PE=3 SV=1 - [E1C319_CHICK]	148.11	0.1618	1	3	3	7	272	30.8	5.24	0.148007	0.0967567
F1NEW6	Uncharacterized protein OS=Gallus gallus GN=MRPL19 PE=4 SV=2 - [F1NEW6_CHICK]	41.87	0.1129	1	2	2	2	248	29.6	9.25	0.0203124	0.870643
F1NED1	Uncharacterized protein OS=Gallus gallus GN=LSS PE=4 SV=2 - [F1NED1_CHICK]	288.75	0.1435	2	8	8	10	676	76.9	6.25	-0.127617	0.259764
E1BTV0	Uncharacterized protein OS=Gallus gallus GN=NDUFA8 PE=4 SV=1 - [E1BTV0_CHICK]	246.85	0.5291	1	7	7	15	172	20.1	8.12	0.0478924	0.527616
F1NMD7	Pre-mRNA-splicing factor RBM22 OS=Gallus gallus GN=RBM22 PE=4 SV=1 - [F1NMD7_CHICK]	33.02	0.0214	2	1	1	1	420	46.7	8.54	0.211244	0.0452956
E1BTT8	L-lactate dehydrogenase OS=Gallus gallus GN=LDHA PE=3 SV=2 - [E1BTT8_CHICK]	799.66	0.6175	2	18	18	135	332	36.5	7.9	-0.215424	0.358891
U6A3T8	Mannose binding lectin 2 (Fragment) OS=Gallus gallus GN=MBL2 PE=2 SV=1 - [U6A3T8_CHICK]	130.25	0.1958	6	4	4	6	240	25.8	6.58	-0.171955	0.0151732
Q9PSQ5	P60=60 kDa stress-related protein (Fragments) OS=Gallus gallus PE=1 SV=1 - [Q9PSQ5_CHICK]	140.85	0.25	1	1	3	10	124	14.2	4.7	0.178224	0.429221
R4GJZ8	Uncharacterized protein OS=Gallus gallus PE=4 SV=1 - [R4GJZ8_CHICK]	216.91	0.2914	1	6	8	19	302	34.1	5.64	0.135938	0.361625
E1BRQ9	Uncharacterized protein OS=Gallus gallus GN=IWS1 PE=4 SV=2 - [E1BRQ9_CHICK]	39.82	0.0275	1	1	1	1	690	77.8	4.78	-0.0168931	0.788162
Q5ZMG9	T-complex protein 1 subunit alpha OS=Gallus gallus GN=TCP1 PE=2 SV=1 - [Q5ZMG9_CHICK]	831.33	0.5538	1	21	21	57	558	60.4	5.88	-0.0645973	0.0229264
F1NRI9	Uncharacterized protein OS=Gallus gallus GN=LOC421740 PE=4 SV=2 - [F1NRI9_CHICK]	581.56	0.5973	1	19	19	72	298	35	7.2	0.2251	0.0595552
F1NUU6	Uncharacterized protein OS=Gallus gallus GN=ENPP6 PE=4 SV=2 - [F1NUU6_CHICK]	126.03	0.0913	1	3	3	6	438	50.5	5.99	-0.10688	0.307348
F1NXP2	Uncharacterized protein OS=Gallus gallus GN=GTF2B PE=4 SV=2 - [F1NXP2_CHICK]	24.28	0.0348	1	1	1	1	316	34.8	8.43	#NUM!	#NUM!
F1P0Y6	Malic enzyme OS=Gallus gallus GN=ME1 PE=3 SV=2 - [F1P0Y6_CHICK]	1136.29	0.5923	3	25	25	155	650	72.1	8.03	-0.0289772	0.851437
H9KZP2	Uncharacterized protein (Fragment) OS=Gallus gallus GN=KRT8 PE=3 SV=2 - [H9KZP2_CHICK]	832.45	0.5122	2	15	19	126	369	42.1	5.06	0.0146762	0.940501
R4GGQ4	Uncharacterized protein OS=Gallus gallus GN=LOC100859352 PE=4 SV=1 - [R4GGQ4_CHICK]	155.58	0.3465	1	3	3	15	101	11	8.18	0.14563	0.357388
F1NFV9	Uncharacterized protein (Fragment) OS=Gallus gallus GN=UAP1 PE=4 SV=2 - [F1NFV9_CHICK]	101.22	0.0919	1	4	4	9	457	50.6	6.89	0.0426111	0.432491
Q5ZL63	Uncharacterized protein OS=Gallus gallus GN=RCJMB04_7i6 PE=2 SV=1 - [Q5ZL63_CHICK]	447.85	0.3394	2	8	8	27	383	41.7	7.97	0.0719208	0.508721
E1C3X0	Uncharacterized protein OS=Gallus gallus GN=TRAPPC6B PE=4 SV=1 - [E1C3X0_CHICK]	32.62	0.0633	1	1	1	1	158	17.9	8.68	#NUM!	#NUM!
F1P5S5	Uncharacterized protein OS=Gallus gallus GN=ACSS3 PE=4 SV=2 - [F1P5S5_CHICK]	572.24	0.3443	1	18	18	44	668	73.4	8.56	0.026771	0.533611
F1NRM8	Endoplasmic reticulum resident protein 29 (Fragment) OS=Gallus gallus GN=ERP29 PE=2 SV=2 - [F1NRM8_CHICK]	357.7	0.3908	1	1	9	52	261	29.1	8.22	0.0486418	0.829011
Q5ZL37	Uncharacterized protein OS=Gallus gallus GN=SUCLG2 PE=2 SV=1 - [Q5ZL37_CHICK]	640.58	0.375	2	15	15	48	432	46.7	6.9	-0.0518141	0.213386
F1NPN5	Uncharacterized protein OS=Gallus gallus GN=SERPINA3 PE=3 SV=2 - [F1NPN5_CHICK]	82.77	0.0719	1	3	3	3	431	48.9	6.47	-0.326174	0.218751
F1NJ97	Uncharacterized protein (Fragment) OS=Gallus gallus GN=IDH3A PE=3 SV=2 - [F1NJ97_CHICK]	181.89	0.1389	3	4	4	10	360	39.3	7.69	-0.0374298	0.832661
F1P4C6	Uncharacterized protein OS=Gallus gallus GN=BPHL PE=4 SV=2 - [F1P4C6_CHICK]	462.52	0.4667	1	14	14	67	285	31.9	8.51	0.0102988	0.845162
E1C0Q5	Uncharacterized protein OS=Gallus gallus GN=ACAT1 PE=3 SV=2 - [E1C0Q5_CHICK]	897.17	0.62	1	21	21	256	421	44.1	9.04	0.0348213	0.786502
F1NYZ7	Uncharacterized protein OS=Gallus gallus GN=CLIC4 PE=4 SV=2 - [F1NYZ7_CHICK]	192.1	0.3429	1	6	6	13	245	27.7	6.25	0.0113089	0.849029
Q9I9D1	Uncharacterized protein OS=Gallus gallus GN=VDAC2 PE=2 SV=1 - [Q9I9D1_CHICK]	647.83	0.5654	1	12	14	166	283	30.2	8.53	0.120653	0.202003
O73665	Desmin (Fragment) OS=Gallus gallus PE=2 SV=1 - [O73665_CHICK]	511.54	0.3661	8	12	13	38	448	51.6	5.38	-0.0397869	0.801448
E1C4L3	Uncharacterized protein OS=Gallus gallus GN=SPR PE=4 SV=1 - [E1C4L3_CHICK]	554.51	0.4701	1	9	9	48	268	28.8	6.09	0.162393	0.117923
E1BSG5	Uncharacterized protein (Fragment) OS=Gallus gallus GN=EIF4G1 PE=4 SV=2 - [E1BSG5_CHICK]	350.9	0.0737	1	6	9	20	1614	178.9	5.48	0.0426902	0.517424
E1C3T6	Uncharacterized protein OS=Gallus gallus GN=ECI1 PE=3 SV=2 - [E1C3T6_CHICK]	800.24	0.5306	1	16	16	199	294	32.9	8.9	-0.0966165	0.268795
R4GFN4	Uncharacterized protein OS=Gallus gallus GN=SAR1B PE=3 SV=1 - [R4GFN4_CHICK]	275.53	0.6414	2	7	9	26	198	22.4	6.11	0.0957408	0.0570809
E1BZY3	Uncharacterized protein (Fragment) OS=Gallus gallus GN=A2LD1 PE=4 SV=2 - [E1BZY3_CHICK]	298.61	0.4759	1	7	7	46	166	18.8	7.44	0.346325	0.0148743
F1NNF7	Uncharacterized protein OS=Gallus gallus GN=LOC100859720 PE=4 SV=1 - [F1NNF7_CHICK]	401.49	0.4586	6	12	13	53	290	32.6	8.91	0.0139035	0.871395
R4GJC4	Uncharacterized protein OS=Gallus gallus GN=CMPK2 PE=3 SV=1 - [R4GJC4_CHICK]	212.36	0.3992	1	8	8	13	253	28	6.38	-0.480807	0.272162
Q5ZKI1	Uncharacterized protein OS=Gallus gallus GN=CLIC2 PE=2 SV=1 - [Q5ZKI1_CHICK]	244.03	0.4877	1	8	8	17	244	28.1	5.57	0.0173364	0.838425
E1C2C3	Uncharacterized protein OS=Gallus gallus GN=SF3B1 PE=4 SV=1 - [E1C2C3_CHICK]	180.33	0.0484	1	5	5	11	1301	145.6	7.09	-0.0623658	0.456897
F1NNV2	Uncharacterized protein OS=Gallus gallus GN=ACSL5 PE=4 SV=1 - [F1NNV2_CHICK]	618.38	0.3763	2	19	20	49	683	75.6	7.62	-0.00197127	0.988898
R4GGL4	Uncharacterized protein (Fragment) OS=Gallus gallus GN=EIF4E PE=3 SV=1 - [R4GGL4_CHICK]	142.53	0.2534	1	6	6	7	221	25.6	6.55	-0.0417343	0.554534
F1NVW7	Uncharacterized protein (Fragment) OS=Gallus gallus GN=NDUFA11 PE=4 SV=2 - [F1NVW7_CHICK]	113.44	0.2628	1	2	2	8	137	14.2	8.19	-0.0161262	0.803723
F1P3K7	Pterin-4-alpha-carbinolamine dehydratase 2 (Fragment) OS=Gallus gallus GN=PCBD2 PE=3 SV=1 - [F1P3K7_CHICK]	84.95	0.3627	2	3	4	4	102	11.6	7.5	0.0899039	0.303664
Q90940	Calcium-binding protein OS=Gallus gallus GN=P22 PE=2 SV=1 - [Q90940_CHICK]	247.88	0.3269	1	6	6	22	208	22.1	9.04	-0.128394	0.574522
F1NVU2	Uncharacterized protein (Fragment) OS=Gallus gallus GN=CYP27A1 PE=3 SV=2 - [F1NVU2_CHICK]	483.18	0.3567	1	12	12	36	527	59.8	9.58	0.0632024	0.214351
E1BZE6	Uncharacterized protein OS=Gallus gallus GN=LOC100859627 PE=4 SV=2 - [E1BZE6_CHICK]	543.93	0.2887	2	11	13	81	388	40.8	9.26	0.0440606	0.547824
E1BXY8	Uncharacterized protein OS=Gallus gallus GN=TIMM10 PE=4 SV=1 - [E1BXY8_CHICK]	97.04	0.2889	1	2	2	4	90	10.3	5.83	0.0639515	0.651437
F1P1A5	Uncharacterized protein OS=Gallus gallus GN=TKT PE=4 SV=2 - [F1P1A5_CHICK]	1063.92	0.5104	1	25	25	157	627	68.4	7.52	0.0465564	0.305942
F1P5K0	Uncharacterized protein (Fragment) OS=Gallus gallus GN=PTBP1 PE=4 SV=2 - [F1P5K0_CHICK]	211.58	0.1906	3	6	6	11	556	60	9.25	0.0933059	0.168527
F1NT20	Uncharacterized protein OS=Gallus gallus GN=ACAT2 PE=3 SV=2 - [F1NT20_CHICK]	784.09	0.6675	2	15	15	130	394	40.9	7.72	-0.0272869	0.683975
R4GJG8	Uncharacterized protein (Fragment) OS=Gallus gallus PE=4 SV=1 - [R4GJG8_CHICK]	43.53	0.0504	1	1	1	2	357	38.3	10.07	0.106186	0.16897
F1NVN3	Uncharacterized protein OS=Gallus gallus GN=MFI2 PE=2 SV=1 - [F1NVN3_CHICK]	43.23	0.0298	2	2	2	2	738	80.7	6.35	-0.06874	0.498673
E1C2E3	Uncharacterized protein (Fragment) OS=Gallus gallus GN=VDAC3 PE=4 SV=2 - [E1C2E3_CHICK]	189.12	0.3415	1	8	9	18	284	30.5	8.82	0.057623	0.473693
F1P1W2	NADH-cytochrome b5 reductase 2 OS=Gallus gallus GN=CYB5R2 PE=2 SV=1 - [F1P1W2_CHICK]	189.53	0.2105	1	1	6	13	304	33.6	9.38	-0.0176929	0.451655
E1BSS3	Eukaryotic translation initiation factor 3 subunit A OS=Gallus gallus GN=EIF3A PE=3 SV=1 - [E1BSS3_CHICK]	395.98	0.1121	1	13	13	29	1365	163.2	7.15	0.0534821	0.162696
F1NYC9	Uncharacterized protein (Fragment) OS=Gallus gallus GN=GNMT PE=4 SV=2 - [F1NYC9_CHICK]	260.2	0.4048	1	6	6	65	210	23.7	7.24	0.0516569	0.10548
E1BW56	Uncharacterized protein OS=Gallus gallus GN=CYFIP1 PE=4 SV=1 - [E1BW56_CHICK]	154.43	0.063	1	4	7	7	1254	145.4	6.87	0.024101	0.759098
E1C4N5	Uncharacterized protein OS=Gallus gallus GN=DPM1 PE=4 SV=2 - [E1C4N5_CHICK]	41.87	0.0372	1	1	1	1	242	27.2	9.36	-0.26049	0.152977
E1C3A3	Uncharacterized protein OS=Gallus gallus GN=PPP1R7 PE=4 SV=2 - [E1C3A3_CHICK]	115.31	0.1927	1	4	4	4	301	34.3	5.17	-0.0962074	0.325317
F1N9J4	60S ribosomal protein L22 (Fragment) OS=Gallus gallus GN=RPL22 PE=2 SV=1 - [F1N9J4_CHICK]	237.86	0.5118	2	4	4	26	127	14.6	9.19	-0.113579	0.749102
A0FKN5	Prestin OS=Gallus gallus GN=SLC26A5 PE=2 SV=1 - [A0FKN5_CHICK]	211.79	0.1429	1	6	6	16	742	81.1	8.44	0.0495861	0.489687
Q05706	Beta-tropomyosin OS=Gallus gallus GN=BRT-1 PE=2 SV=1 - [Q05706_CHICK]	358.36	0.3286	3	3	12	45	283	32.8	4.79	0.30807	0.599666
Q8AWI4	Alpha-tropomyosin 2 OS=Gallus gallus GN=TPM1 PE=2 SV=1 - [Q8AWI4_CHICK]	477.85	0.4049	1	3	13	70	284	32.8	4.69	0.273005	0.330803
Q05705	Beta-tropomyosin OS=Gallus gallus GN=BRT-2 PE=2 SV=1 - [Q05705_CHICK]	411.22	0.2903	2	3	10	51	248	28.7	4.68	0.129342	0.517423
Q90740	Alpha-tropomyosin OS=Gallus gallus PE=2 SV=1 - [Q90740_CHICK]	385.44	0.3993	1	4	12	68	283	32.8	4.79	0.0715627	0.793848
F1NK75	Uncharacterized protein OS=Gallus gallus PE=3 SV=2 - [F1NK75_CHICK]	349.41	0.3099	1	4	11	36	284	32.8	4.73	-0.110627	0.632392
Q91005	Alpha tropomyosin of brain OS=Gallus gallus GN=alpha-fTM PE=3 SV=1 - [Q91005_CHICK]	388.79	0.298	1	3	10	68	245	28.4	4.68	-0.00361502	0.99061
Q5ZLJ7	Uncharacterized protein OS=Gallus gallus GN=RCJMB04_5n23 PE=2 SV=1 - [Q5ZLJ7_CHICK]	668.55	0.4194	2	5	13	93	248	28.7	4.72	0.0419809	0.896522
F1P5K6	Poly [ADP-ribose] polymerase 1 OS=Gallus gallus GN=PARP1 PE=4 SV=2 - [F1P5K6_CHICK]	196.69	0.1102	4	8	8	10	926	103.7	8.68	0.00447828	0.862858
F1NK29	Na(+)/H(+) exchange regulatory cofactor NHE-RF1 OS=Gallus gallus GN=SLC9A3R1 PE=4 SV=1 - [F1NK29_CHICK]	335.05	0.3514	2	9	9	40	333	35.9	6.16	0.0542385	0.605715
A9NJ60	GPI-anchored ADP-ribosyltransferase OS=Gallus gallus GN=ART7C PE=2 SV=1 - [A9NJ60_CHICK]	66.94	0.06	3	2	2	11	300	33.9	9.33	-0.272195	0.393113
R4GMD9	Uncharacterized protein OS=Gallus gallus GN=TXNDC17 PE=4 SV=1 - [R4GMD9_CHICK]	202.33	0.5082	1	6	6	28	122	14.2	5.59	0.0192002	0.862713
F1NIC5	Uncharacterized protein (Fragment) OS=Gallus gallus GN=TIMM8A PE=4 SV=2 - [F1NIC5_CHICK]	194.37	0.4909	1	5	5	15	110	12.2	7.78	0.104916	0.766569
Q5ZL56	Uncharacterized protein OS=Gallus gallus GN=ACADS PE=2 SV=1 - [Q5ZL56_CHICK]	692.87	0.4904	1	13	13	42	416	44.6	8.46	0.0353418	0.609402
F1NCY5	Uncharacterized protein OS=Gallus gallus GN=KIAA0776 PE=4 SV=1 - [F1NCY5_CHICK]	101.4	0.0482	2	3	3	3	789	89.2	6.52	-0.0492774	0.453114
F1NIE8	Uncharacterized protein OS=Gallus gallus GN=RANGAP1 PE=2 SV=1 - [F1NIE8_CHICK]	32.44	0.0311	2	1	1	2	579	62.9	4.77	-0.116276	0.155976
F6QGI8	Uncharacterized protein OS=Gallus gallus GN=FBP1 PE=3 SV=1 - [F6QGI8_CHICK]	1486.97	0.6172	1	18	28	462	418	44.6	8.5	0.116954	0.185264
F1NVF3	Uncharacterized protein OS=Gallus gallus GN=GC PE=4 SV=1 - [F1NVF3_CHICK]	634.47	0.5764	2	19	19	44	484	53.7	6.87	-0.0658201	0.627716
F1NZD3	Uncharacterized protein OS=Gallus gallus GN=RBMX PE=4 SV=1 - [F1NZD3_CHICK]	124.25	0.0779	2	3	3	8	385	41.5	10.14	0.0956392	0.338887
F1NLS1	Uncharacterized protein (Fragment) OS=Gallus gallus GN=LOC420516 PE=4 SV=1 - [F1NLS1_CHICK]	684.12	0.1956	2	23	23	52	1457	166.5	6.14	0.0931363	0.238137
E1C814	Uncharacterized protein OS=Gallus gallus GN=EBF2 PE=3 SV=2 - [E1C814_CHICK]	23.41	0.0139	1	1	1	1	575	62.7	9.06	-0.243007	0.052986
F1NE09	Uncharacterized protein OS=Gallus gallus GN=CYFIP2 PE=4 SV=2 - [F1NE09_CHICK]	95.98	0.0359	1	1	4	4	1253	145.6	7.05	0.285633	0.0288419
E1BSE2	Uncharacterized protein OS=Gallus gallus GN=DPYS PE=4 SV=2 - [E1BSE2_CHICK]	807.64	0.5697	1	20	20	161	502	54.7	6.11	0.0680265	0.464351
E1C988	Oxysterol-binding protein OS=Gallus gallus GN=OSBPL1A PE=3 SV=2 - [E1C988_CHICK]	21.21	0.0105	1	1	1	1	955	108.2	6.15	#NUM!	#NUM!
E1BRR7	Uncharacterized protein OS=Gallus gallus GN=HAO1 PE=4 SV=2 - [E1BRR7_CHICK]	459.17	0.4075	1	11	12	44	373	40.9	8.1	0.251204	0.00377596
E1C0E1	Uncharacterized protein (Fragment) OS=Gallus gallus GN=HAO2 PE=4 SV=2 - [E1C0E1_CHICK]	203.55	0.2258	1	5	6	8	372	41.2	7.12	0.0586994	0.561636
E1BYN7	Uncharacterized protein OS=Gallus gallus GN=VDAC1 PE=4 SV=1 - [E1BYN7_CHICK]	531.44	0.6078	1	12	14	104	283	30.7	7.4	0.0770482	0.0188752
E1BYW3	Uncharacterized protein OS=Gallus gallus GN=NQO1 PE=4 SV=2 - [E1BYW3_CHICK]	516.47	0.5693	1	14	14	107	274	30.3	8.62	0.0685406	0.477508
F1P0P4	Signal recognition particle subunit SRP68 OS=Gallus gallus GN=SRP68 PE=3 SV=1 - [F1P0P4_CHICK]	78.27	0.0316	2	2	2	3	602	68.8	8.43	-0.0562905	0.459585
O93601	Apolipoprotein AIV OS=Gallus gallus GN=apoAIV PE=2 SV=1 - [O93601_CHICK]	914.06	0.5656	1	19	19	83	366	40.8	4.84	0.385189	0.236214
F1NJ08	Vimentin OS=Gallus gallus GN=VIM PE=2 SV=1 - [F1NJ08_CHICK]	653.9	0.4217	9	15	18	62	460	53.2	5.21	-0.270666	0.176983
Q5F337	Uncharacterized protein OS=Gallus gallus GN=RAC2 PE=2 SV=1 - [Q5F337_CHICK]	126.69	0.1719	1	2	4	10	192	21.4	7.91	-0.0152908	0.825047
E1BZG2	Uncharacterized protein OS=Gallus gallus GN=UAP1L1 PE=4 SV=1 - [E1BZG2_CHICK]	93.64	0.0978	1	4	4	5	511	56.9	6.54	0.0960534	0.405451
F1NYW8	Uncharacterized protein OS=Gallus gallus GN=FAH PE=4 SV=2 - [F1NYW8_CHICK]	587.05	0.4296	1	14	14	83	419	46.5	7.68	0.103043	0.150956
Q5ZI60	Coronin OS=Gallus gallus GN=CORO1C PE=2 SV=1 - [Q5ZI60_CHICK]	392.6	0.3312	6	14	14	34	474	53.2	6.67	-0.0808689	0.343829
F5CE71	Cathepsin H OS=Gallus gallus GN=CTSH PE=2 SV=1 - [F5CE71_CHICK]	224.75	0.2067	1	5	5	16	329	36.4	6.9	0.156061	0.132229
H9L023	Nicalin OS=Gallus gallus GN=NCLN PE=4 SV=2 - [H9L023_CHICK]	77.96	0.0516	2	2	2	2	562	63	6.35	0.0469253	0.768168
R4GJ45	Uncharacterized protein (Fragment) OS=Gallus gallus GN=WBSCR27 PE=4 SV=1 - [R4GJ45_CHICK]	217.67	0.3975	1	6	6	14	244	26.5	7.78	0.0442482	0.54319
F1P3P3	Uncharacterized protein OS=Gallus gallus GN=ARHGDIA PE=4 SV=1 - [F1P3P3_CHICK]	267.83	0.4706	2	7	7	48	204	23.2	5.11	0.0401865	0.271231
F1P2T2	NADPH--cytochrome P450 reductase OS=Gallus gallus GN=POR PE=3 SV=2 - [F1P2T2_CHICK]	754.42	0.4068	2	18	18	59	676	76.9	5.6	-0.0204455	0.837827
F1NIX0	Uncharacterized protein OS=Gallus gallus GN=RPL8 PE=3 SV=2 - [F1NIX0_CHICK]	170.15	0.3307	1	6	6	11	257	28	10.96	-0.0712555	0.803495
F1NIF9	Uncharacterized protein (Fragment) OS=Gallus gallus PE=4 SV=2 - [F1NIF9_CHICK]	96.53	0.0308	1	2	2	6	746	83.8	8.37	0.0225478	0.884584
F1NBW2	Uncharacterized protein OS=Gallus gallus GN=LOC100859311 PE=2 SV=1 - [F1NBW2_CHICK]	431.45	0.2188	4	9	9	19	617	68.3	5.67	-0.0368545	0.654711
Q98TH5	Ribosomal protein S11 OS=Gallus gallus GN=cRPS11 PE=3 SV=1 - [Q98TH5_CHICK]	201.05	0.4494	2	8	8	22	158	18.3	10.3	-0.182603	0.466935
F1NTG9	Uncharacterized protein (Fragment) OS=Gallus gallus GN=DAZAP1 PE=4 SV=2 - [F1NTG9_CHICK]	127.71	0.1201	2	3	3	8	408	43.6	8.75	-0.0306973	0.734302
Q5ZLG6	Annexin OS=Gallus gallus GN=RCJMB04_6f1 PE=2 SV=1 - [Q5ZLG6_CHICK]	236.08	0.2392	2	7	7	13	347	38.6	8.1	-0.0540166	0.646287
F1N9B4	Uncharacterized protein OS=Gallus gallus GN=LOC417013 PE=3 SV=2 - [F1N9B4_CHICK]	615.33	0.315	1	13	13	48	638	70.4	7.59	0.101001	0.239313
F1NI29	Uncharacterized protein OS=Gallus gallus GN=HADHA PE=3 SV=2 - [F1NI29_CHICK]	1646.13	0.6055	3	1	32	395	796	85.7	9.25	-0.0795724	0.292762
O57660	CFR-associated protein p70 OS=Gallus gallus PE=2 SV=1 - [O57660_CHICK]	1588.45	0.6182	3	1	32	353	770	83.1	9.1	-0.075594	0.388976
E1C9H5	Uncharacterized protein OS=Gallus gallus GN=AADAT PE=4 SV=1 - [E1C9H5_CHICK]	199.77	0.2056	1	6	6	11	428	47.6	8.53	0.1075	0.337054
Q90WA9	Fatty acid-binding protein, liver OS=Gallus gallus GN=LFABP PE=2 SV=1 - [Q90WA9_CHICK]	273.86	0.6772	1	7	7	251	127	14.2	7.96	0.22667	0.34643
Q5ZMU9	Uncharacterized protein OS=Gallus gallus GN=vcp PE=1 SV=1 - [Q5ZMU9_CHICK]	1553.14	0.5856	3	37	37	181	806	89.3	5.26	0.110979	0.408628
F1NQS2	Glutathione S-transferase OS=Gallus gallus GN=LOC396380 PE=3 SV=1 - [F1NQS2_CHICK]	688.83	0.7467	1	1	18	183	229	26.3	9.03	0.361709	0.076815
Q9W6J3	Glutathione S-transferase (Fragment) OS=Gallus gallus PE=2 SV=1 - [Q9W6J3_CHICK]	494.05	0.8065	1	9	14	121	186	21.3	8.24	0.128938	0.59437
E1BY44	Uncharacterized protein (Fragment) OS=Gallus gallus GN=TGM2 PE=3 SV=2 - [E1BY44_CHICK]	875.76	0.3706	2	1	22	83	688	77.7	5.05	0.224808	0.200403
E1C735	S-adenosylmethionine synthase OS=Gallus gallus GN=MAT1A PE=3 SV=1 - [E1C735_CHICK]	514.59	0.298	2	12	12	59	396	43.7	6.76	0.00303282	0.857586
Q90712	Zipper protein OS=Gallus gallus PE=2 SV=1 - [Q90712_CHICK]	61.58	0.0716	40	1	2	2	433	49.2	7.05	0.107642	0.117859
A0FCR2	MHC class IV antigen (Fragment) OS=Gallus gallus GN=B-G PE=4 SV=1 - [A0FCR2_CHICK]	70.23	0.1729	77	1	2	2	133	14.6	5.76	-0.258015	0.535637
D0EYG3	Selenoprotein W OS=Gallus gallus GN=SEPW1 PE=2 SV=1 - [SELW_CHICK]	62.84	0.1176	1	1	1	3	85	9.5	9.48	0.214739	0.518001
F1NTQ2	Beta-hexosaminidase (Fragment) OS=Gallus gallus GN=HEXB PE=3 SV=2 - [F1NTQ2_CHICK]	397.77	0.3043	1	11	12	25	562	63.4	6.49	0.11196	0.0274743
F1NB02	40S ribosomal protein S8 OS=Gallus gallus GN=RPS8 PE=3 SV=2 - [F1NB02_CHICK]	269.54	0.4038	2	7	7	16	208	24.2	10.32	0.1784	0.613079
R4GHK2	Uncharacterized protein OS=Gallus gallus GN=LOC100857892 PE=4 SV=1 - [R4GHK2_CHICK]	118.5	0.1365	1	4	4	8	271	29.9	5.41	-0.0764449	0.6457
F1P174	Uncharacterized protein OS=Gallus gallus GN=MIPEP PE=3 SV=2 - [F1P174_CHICK]	47.86	0.027	1	2	2	2	704	79.5	6.39	-0.851403	0.0969227
F1N854	Uncharacterized protein OS=Gallus gallus PE=4 SV=2 - [F1N854_CHICK]	427.09	0.4307	1	3	12	35	332	37.7	6.19	0.186899	0.116173
F1NYM4	Uncharacterized protein (Fragment) OS=Gallus gallus GN=LOC426599 PE=4 SV=2 - [F1NYM4_CHICK]	576.63	0.3586	1	5	14	44	474	53.2	6.35	0.216437	0.0717097
F1NMA4	Uncharacterized protein OS=Gallus gallus GN=LOC431192 PE=4 SV=2 - [F1NMA4_CHICK]	26.06	0.0063	1	1	1	3	1262	144.6	6.77	1.05393	0.131409
E1C7S2	Uncharacterized protein OS=Gallus gallus GN=LOC100858057 PE=4 SV=2 - [E1C7S2_CHICK]	639.92	0.5278	1	17	17	72	413	44.2	8.28	0.0289063	0.535453
E1BXG9	Uncharacterized protein OS=Gallus gallus GN=PPID PE=4 SV=2 - [E1BXG9_CHICK]	516.41	0.4162	1	14	14	49	370	40.5	6.38	0.126138	0.195878
R4GHS0	Uncharacterized protein OS=Gallus gallus GN=HSD17B12 PE=3 SV=1 - [R4GHS0_CHICK]	183.93	0.3134	1	6	6	14	268	29.7	9.52	-0.0996996	0.344972
Q6PVZ5	Type II alpha-keratin IIA OS=Gallus gallus GN=KRT5 PE=2 SV=1 - [Q6PVZ5_CHICK]	178.54	0.0918	7	1	6	32	599	62.4	8.37	-0.260517	0.0262584
F1NUW5	Uncharacterized protein OS=Gallus gallus GN=CLTB PE=4 SV=1 - [F1NUW5_CHICK]	113.58	0.1922	2	5	6	10	255	28.1	4.92	-0.0118573	0.952123
H9KZI4	Annexin OS=Gallus gallus PE=3 SV=2 - [H9KZI4_CHICK]	642.04	0.6	1	13	14	38	320	36	5.34	-0.210625	0.186697
E1BUD8	Uncharacterized protein OS=Gallus gallus GN=SEC24C PE=4 SV=1 - [E1BUD8_CHICK]	423.04	0.1609	2	13	13	23	1119	121.6	6.83	-0.0709107	0.223742
F1P587	Uncharacterized protein OS=Gallus gallus GN=LOC418892 PE=4 SV=2 - [F1P587_CHICK]	422.09	0.1191	1	14	14	23	1687	189.9	7.3	-0.0119358	0.916195
Q5ZMM4	Catalase OS=Gallus gallus GN=RCJMB04_1j22 PE=2 SV=1 - [Q5ZMM4_CHICK]	1133.43	0.6208	3	29	29	217	530	60	8.05	0.209876	0.129156
H9KYY1	Uncharacterized protein (Fragment) OS=Gallus gallus GN=Gga.30045 PE=4 SV=2 - [H9KYY1_CHICK]	53.15	0.0151	1	2	2	3	1196	136.9	5.67	-0.0728195	0.695554
F1NC02	Proteasome subunit alpha type OS=Gallus gallus GN=PSMA4 PE=3 SV=2 - [F1NC02_CHICK]	263.58	0.4061	1	7	7	23	261	29.5	7.33	-0.0144852	0.7626
O93467	GTP-binding protein OS=Gallus gallus GN=cRhoA PE=2 SV=1 - [O93467_CHICK]	437.31	0.7202	4	9	11	42	193	21.8	6.1	-0.035018	0.337107
R4GKY6	Uncharacterized protein OS=Gallus gallus GN=TMEM114 PE=4 SV=1 - [R4GKY6_CHICK]	28.4	0.0521	2	1	1	1	211	23.2	7.9	#NUM!	#NUM!
F1NSY1	Sodium/potassium-transporting ATPase subunit alpha-1 (Fragment) OS=Gallus gallus GN=ATP1A1 PE=2 SV=2 - [F1NSY1_CHICK]	1086.4	0.35	9	24	24	66	1017	112	5.62	-0.0584607	0.260871
F1N8H6	Heterochromatin protein 1-binding protein 3 OS=Gallus gallus GN=HP1BP3 PE=3 SV=1 - [F1N8H6_CHICK]	142.47	0.1181	2	5	5	11	559	61.8	9.33	-0.0231681	0.881897
Q5ZJ70	Uncharacterized protein OS=Gallus gallus GN=PDCD6IP PE=2 SV=1 - [Q5ZJ70_CHICK]	164.73	0.0805	1	6	6	9	882	97.3	6.4	0.0884761	0.468818
E1C8Q5	V-type proton ATPase 116 kDa subunit a isoform 1 OS=Gallus gallus GN=ATP6V0A1 PE=4 SV=2 - [E1C8Q5_CHICK]	32.8	0.0156	2	1	1	1	832	95.3	6.74	0.0434883	0.577421
F1P5I8	Uncharacterized protein OS=Gallus gallus GN=ACBD3 PE=4 SV=1 - [F1P5I8_CHICK]	127.76	0.0886	2	3	3	6	519	59.5	5.1	0.0167853	0.871775
F1NSE3	Uncharacterized protein (Fragment) OS=Gallus gallus GN=CRAT PE=3 SV=2 - [F1NSE3_CHICK]	592.67	0.3264	1	17	17	79	628	71.3	8.5	0.0311756	0.822467
E1BS31	Uncharacterized protein OS=Gallus gallus GN=MPP6 PE=4 SV=2 - [E1BS31_CHICK]	97.7	0.0898	2	4	4	5	501	56.5	6.61	-0.299848	0.153615
F1NRG5	Uncharacterized protein (Fragment) OS=Gallus gallus GN=TM9SF3 PE=4 SV=2 - [F1NRG5_CHICK]	59.25	0.0322	1	2	2	3	590	68.2	7.21	-0.411575	0.0383975
F1NFR4	Exportin-7 OS=Gallus gallus GN=XPO7 PE=4 SV=2 - [F1NFR4_CHICK]	244.58	0.1067	2	7	7	9	1087	123.8	6.35	-0.0128211	0.780418
E1C700	Uncharacterized protein OS=Gallus gallus GN=LAMB2 PE=4 SV=2 - [E1C700_CHICK]	131.56	0.0323	3	4	4	12	1643	179	7.18	-0.0680599	0.434162
F1NPJ8	Glutathione peroxidase (Fragment) OS=Gallus gallus PE=3 SV=1 - [F1NPJ8_CHICK]	234.49	0.3575	1	6	6	19	221	24.6	8.38	0.0042587	0.959128
E1BY93	Uncharacterized protein OS=Gallus gallus GN=IGJ PE=4 SV=1 - [E1BY93_CHICK]	21.5	0.038	2	1	1	2	158	17.9	5.35	-0.380155	0.0125801
Q9I8D4	Fructose-1,6-bisphosphatase (Fragment) OS=Gallus gallus GN=FBP1 PE=2 SV=1 - [Q9I8D4_CHICK]	489.91	0.5238	1	1	11	120	168	18.2	5.38	0.0916264	0.671755
F1NY09	Uncharacterized protein OS=Gallus gallus GN=C1H11orf54 PE=4 SV=2 - [F1NY09_CHICK]	770.39	0.7816	1	16	16	190	316	34.7	6.61	0.152577	0.25808
F1NSZ4	Uncharacterized protein OS=Gallus gallus GN=NPEPL1 PE=4 SV=2 - [F1NSZ4_CHICK]	290.64	0.2715	1	9	9	26	523	56.1	6.86	-0.0338298	0.626399
F1NL52	Uncharacterized protein OS=Gallus gallus GN=NKRF PE=4 SV=2 - [F1NL52_CHICK]	23.08	0.0117	2	1	1	1	768	86.3	8.84	-0.34178	0.185019
F1NYA9	Uncharacterized protein OS=Gallus gallus GN=EEF1B2 PE=2 SV=1 - [F1NYA9_CHICK]	396.94	0.6027	3	8	11	59	224	24.7	4.78	0.120981	0.228803
F1NFC6	Uncharacterized protein (Fragment) OS=Gallus gallus GN=RPS4X PE=2 SV=2 - [F1NFC6_CHICK]	444.34	0.5	2	15	15	61	262	29.4	10.15	-0.0443641	0.854387
E1C2Z5	Uncharacterized protein OS=Gallus gallus GN=WARS PE=3 SV=1 - [E1C2Z5_CHICK]	33.47	0.0296	3	1	2	5	473	53.7	7.28	-0.074014	0.477484
F1NB83	Uncharacterized protein (Fragment) OS=Gallus gallus GN=TPP1 PE=4 SV=2 - [F1NB83_CHICK]	34.11	0.0333	1	1	1	1	270	30	6.39	0.317651	0.0153402
Q5ZI61	Uncharacterized protein OS=Gallus gallus GN=RCJMB04_30a22 PE=2 SV=1 - [Q5ZI61_CHICK]	309.54	0.2136	2	10	10	15	693	76.6	7.09	0.0314548	0.737297
E1BU66	Uncharacterized protein (Fragment) OS=Gallus gallus GN=RPL38 PE=3 SV=2 - [E1BU66_CHICK]	74.71	0.3333	1	3	3	15	72	8.3	10.1	0.156058	0.536985
F1NJU7	Tyrosine--tRNA ligase, cytoplasmic OS=Gallus gallus GN=YARS PE=4 SV=2 - [F1NJU7_CHICK]	472.65	0.3454	2	13	14	25	527	59.3	6.65	0.11778	0.111012
F1N9Q2	Uncharacterized protein (Fragment) OS=Gallus gallus GN=GLO1 PE=4 SV=2 - [F1N9Q2_CHICK]	289.11	0.5135	1	8	8	30	185	21.1	6.55	0.163472	0.312116
E1C852	Uncharacterized protein OS=Gallus gallus GN=Gga.5362 PE=4 SV=1 - [E1C852_CHICK]	161.66	0.1896	1	5	5	16	327	35.6	7.27	-0.0672911	0.650437
E1BYF1	Uncharacterized protein OS=Gallus gallus GN=CTH PE=3 SV=1 - [E1BYF1_CHICK]	755.33	0.599	1	17	17	76	399	43.9	7.25	-0.0148222	0.936553
F1NSP8	Uncharacterized protein OS=Gallus gallus GN=HNRNPU PE=4 SV=2 - [F1NSP8_CHICK]	191.12	0.1222	2	8	8	20	671	74.9	9.35	-0.059616	0.512166
F1NH84	Uncharacterized protein OS=Gallus gallus GN=AK3 PE=3 SV=2 - [F1NH84_CHICK]	518.44	0.6608	1	14	14	63	227	25.6	8.85	0.0781007	0.703276
E1BW27	Uncharacterized protein OS=Gallus gallus GN=TMEM33 PE=4 SV=1 - [E1BW27_CHICK]	20.08	0.0319	1	1	1	1	251	28.3	9.7	-0.0207492	0.850923
E1C453	Heterogeneous nuclear ribonucleoprotein K OS=Gallus gallus GN=HNRNPK PE=4 SV=1 - [E1C453_CHICK]	691.88	0.4953	3	18	18	71	426	47.1	6.47	-0.0207669	0.591627
C3VQ53	Beta-actin (Fragment) OS=Gallus gallus PE=2 SV=1 - [C3VQ53_CHICK]	99.46	0.6585	1	1	4	51	41	4.7	5.1	0.0239257	0.902066
F1NNV6	Uncharacterized protein (Fragment) OS=Gallus gallus GN=ATP6AP1 PE=4 SV=2 - [F1NNV6_CHICK]	30.18	0.0215	1	1	1	1	465	52	5.05	0.0468222	0.678164
R4GJX7	Proteasome subunit alpha type-7 OS=Gallus gallus GN=PSMA7 PE=4 SV=1 - [R4GJX7_CHICK]	348.99	0.5023	2	10	10	29	217	24.5	8.7	0.0295849	0.362946
F1NT28	Uncharacterized protein (Fragment) OS=Gallus gallus GN=PPA1 PE=4 SV=1 - [F1NT28_CHICK]	324.32	0.4118	1	9	9	53	306	34	5.96	0.0937022	0.522841
R4GIW9	Uncharacterized protein OS=Gallus gallus GN=LOC769704 PE=4 SV=1 - [R4GIW9_CHICK]	173.9	0.3602	1	1	5	42	161	17.8	7.91	0.0898237	0.233937
Q5ZJ49	Uncharacterized protein OS=Gallus gallus GN=PMPCA PE=2 SV=1 - [Q5ZJ49_CHICK]	161.39	0.1079	1	4	4	8	519	57.5	7.18	-0.049752	0.5089
F2Z4K4	60S ribosomal protein L5 (Fragment) OS=Gallus gallus GN=RPL5 PE=2 SV=1 - [F2Z4K4_CHICK]	242.32	0.2872	2	7	7	41	296	33.9	9.72	-0.0368071	0.778277
F1NYK1	Uncharacterized protein OS=Gallus gallus GN=PPT1 PE=4 SV=1 - [F1NYK1_CHICK]	60.64	0.1133	2	3	3	6	300	33.8	7.44	0.147947	0.0350793
F1N8Q1	Superoxide dismutase [Cu-Zn] OS=Gallus gallus GN=SOD1 PE=3 SV=2 - [F1N8Q1_CHICK]	316.27	0.5325	1	2	7	196	154	15.7	6.6	0.149509	0.419451
F1NBE3	Uncharacterized protein OS=Gallus gallus GN=GCAT PE=3 SV=2 - [F1NBE3_CHICK]	576.15	0.389	2	12	12	62	419	45.2	8.22	-0.0300927	0.774266
R4GKA1	Uncharacterized protein OS=Gallus gallus PE=3 SV=1 - [R4GKA1_CHICK]	290.3	0.2971	1	5	5	43	175	19	4.86	0.1505	0.551375
F1NQC3	Glutamine synthetase OS=Gallus gallus GN=GLUL PE=3 SV=2 - [F1NQC3_CHICK]	552.53	0.4407	3	14	14	116	413	46.5	7.72	0.0295822	0.699092
F6RX73	Proteasome subunit beta type (Fragment) OS=Gallus gallus GN=PSMB7 PE=3 SV=1 - [F6RX73_CHICK]	52.26	0.1351	4	3	3	6	259	28.1	6.4	-0.0924658	0.16437
E1BSX0	Uncharacterized protein OS=Gallus gallus GN=AGXT PE=3 SV=2 - [E1BSX0_CHICK]	455.05	0.4159	1	11	11	34	416	45.1	8.25	0.0887871	0.453489
E1BQQ4	Uncharacterized protein OS=Gallus gallus GN=NUMA1 PE=4 SV=2 - [E1BQQ4_CHICK]	77.69	0.018	3	3	3	6	2113	238	6.23	-0.0705152	0.544952
Q5ZIZ0	6-phosphogluconate dehydrogenase, decarboxylating OS=Gallus gallus GN=PGD PE=2 SV=1 - [Q5ZIZ0_CHICK]	311.59	0.3126	1	11	11	18	483	53.3	6.98	-0.0259353	0.664537
F1NF81	Acyl-CoA-binding protein (Fragment) OS=Gallus gallus GN=DBI PE=4 SV=1 - [F1NF81_CHICK]	165.12	0.7674	3	7	7	28	86	9.6	8.31	0.410302	0.278529
F1NMA2	Uncharacterized protein OS=Gallus gallus GN=SULT1E1 PE=4 SV=2 - [F1NMA2_CHICK]	288.33	0.3373	1	7	8	43	332	37.8	6.47	-0.0993843	0.151961
F1P2G4	Adenylyl cyclase-associated protein OS=Gallus gallus GN=CAP1 PE=3 SV=2 - [F1P2G4_CHICK]	426.55	0.3371	1	13	13	39	537	57.6	7.99	0.024431	0.659777
F1NU17	Phosphoglycerate kinase OS=Gallus gallus GN=PGK1 PE=3 SV=1 - [F1NU17_CHICK]	944.56	0.6954	2	28	28	152	417	44.6	8.12	0.164417	0.104321
B2X016	Mx protein (Fragment) OS=Gallus gallus GN=Mx PE=2 SV=1 - [B2X016_CHICK]	190.87	0.1021	31	5	5	7	705	79.5	7.23	-0.349676	0.211067
Q9I8A2	Vacuolar H-ATPase B subunit osteoclast isozyme (Fragment) OS=Gallus gallus GN=VATB PE=2 SV=1 - [Q9I8A2_CHICK]	399.97	0.2762	3	9	9	20	496	55	5.69	0.0172371	0.721005
E1C4B8	Uncharacterized protein (Fragment) OS=Gallus gallus GN=PMM2 PE=2 SV=2 - [E1C4B8_CHICK]	259.09	0.465	2	9	9	16	243	27.9	5.6	-0.0152493	0.890886
E1C0I2	Uncharacterized protein OS=Gallus gallus GN=KLC4 PE=4 SV=2 - [E1C0I2_CHICK]	84.31	0.0579	1	3	3	3	656	73.6	6.62	0.130933	0.323429
E1C8X4	Uncharacterized protein OS=Gallus gallus GN=CC2D2A PE=4 SV=2 - [E1C8X4_CHICK]	37.89	0.0058	1	1	1	6	1548	177.4	5.72	0.0572729	0.766683
R4GHG6	Uncharacterized protein OS=Gallus gallus GN=LOC100858988 PE=4 SV=1 - [R4GHG6_CHICK]	115.81	0.1504	1	3	3	5	246	26	5.92	0.0452374	0.467967
E1C1N8	Uncharacterized protein (Fragment) OS=Gallus gallus GN=AKAP1 PE=4 SV=2 - [E1C1N8_CHICK]	53.04	0.0317	1	3	3	3	884	95.5	5.05	0.063419	0.0650844
F1NU73	Uncharacterized protein (Fragment) OS=Gallus gallus GN=TRAP1 PE=3 SV=2 - [F1NU73_CHICK]	378.56	0.2353	2	11	12	32	697	78.9	6.84	-0.0191134	0.687935
Q6JLB2	Proteasome subunit beta type OS=Gallus gallus GN=PSMB1 PE=3 SV=1 - [Q6JLB2_CHICK]	189.05	0.3165	1	5	5	14	237	26	6.89	0.00395933	0.963893
Q5ZM32	Dihydrolipoyl dehydrogenase OS=Gallus gallus GN=DLD PE=2 SV=1 - [Q5ZM32_CHICK]	723.52	0.4311	1	15	15	105	508	53.9	7.99	0.0270017	0.563827
Q5ZLX0	Uncharacterized protein OS=Gallus gallus GN=PGRMC2 PE=2 SV=1 - [Q5ZLX0_CHICK]	194.81	0.2462	1	3	4	10	195	21.6	5.38	0.102496	0.229946
F1NLC7	Uncharacterized protein OS=Gallus gallus GN=TXNDC12 PE=4 SV=2 - [F1NLC7_CHICK]	140.26	0.2471	1	4	4	13	170	18.6	5.78	0.11612	0.542156
F1NQG5	Ribosomal protein L15 OS=Gallus gallus GN=RPL15 PE=2 SV=2 - [F1NQG5_CHICK]	129.07	0.2402	2	4	4	18	204	24.1	11.62	0.146277	0.144498
E1C7E1	Uncharacterized protein OS=Gallus gallus GN=HRSP12 PE=4 SV=2 - [E1C7E1_CHICK]	502.73	0.8633	2	10	10	229	139	14.8	8.43	0.209544	0.399999
E1BUG9	Uncharacterized protein OS=Gallus gallus GN=NUDCD2 PE=4 SV=1 - [E1BUG9_CHICK]	33.04	0.1847	1	2	2	2	157	17.8	5.08	-0.117705	0.50326
E1BSH2	Uncharacterized protein OS=Gallus gallus GN=SLCO1A2 PE=4 SV=2 - [E1BSH2_CHICK]	408.59	0.1743	1	9	9	35	654	72.5	7.53	0.0401905	0.717551
Q5ZMV5	Actin-related protein 2/3 complex subunit 5 OS=Gallus gallus GN=RCJMB04_1b5 PE=2 SV=1 - [Q5ZMV5_CHICK]	188.23	0.3907	2	5	5	13	151	16.4	5.64	0.03954	0.6041
F1NXV6	Uncharacterized protein OS=Gallus gallus GN=F2 PE=3 SV=1 - [F1NXV6_CHICK]	121.56	0.1021	2	6	6	8	607	69.1	5.74	-0.0857138	0.423623
F1NYC4	Clathrin heavy chain (Fragment) OS=Gallus gallus GN=CLTCL1 PE=2 SV=1 - [F1NYC4_CHICK]	743.17	0.1243	1	1	20	70	1681	191.8	5.85	#NUM!	#NUM!
R9PXM7	Coatomer subunit delta (Fragment) OS=Gallus gallus GN=ARCN1 PE=4 SV=1 - [R9PXM7_CHICK]	246.66	0.2043	2	9	9	22	509	57	6.07	0.0344331	0.578985
Q5F3J3	Uncharacterized protein OS=Gallus gallus GN=RCJMB04_15g18 PE=2 SV=1 - [Q5F3J3_CHICK]	358.82	0.2864	2	1	12	24	433	48.9	4.97	-0.0725641	0.914577
F1P455	Uncharacterized protein OS=Gallus gallus GN=NPEPPS PE=4 SV=2 - [F1P455_CHICK]	696.45	0.3696	2	15	26	54	863	97.2	5.49	-0.0420879	0.49802
Q5F4C5	Uncharacterized protein OS=Gallus gallus GN=RAB35 PE=2 SV=1 - [Q5F4C5_CHICK]	167.74	0.199	9	1	3	18	201	23.1	8.05	-0.167419	0.250677
F6UGI5	Uncharacterized protein OS=Gallus gallus GN=RAB1A PE=3 SV=1 - [F6UGI5_CHICK]	293.27	0.439	10	4	7	33	205	22.7	6.21	-0.0151039	0.777831
E1C8H0	Uncharacterized protein OS=Gallus gallus GN=RAB4A PE=3 SV=2 - [E1C8H0_CHICK]	78.27	0.0963	9	1	2	9	218	24.3	6.07	-0.151531	0.12352
F1P1G4	Uncharacterized protein OS=Gallus gallus GN=RAB43 PE=3 SV=2 - [F1P1G4_CHICK]	99.83	0.1721	9	2	3	10	215	23.7	5.35	-0.20971	0.0219964
E1C080	Uncharacterized protein OS=Gallus gallus GN=RAB8B PE=3 SV=2 - [E1C080_CHICK]	177.21	0.2077	9	1	4	23	207	23.6	9.06	-0.0623191	0.469604
E1BRR6	Uncharacterized protein OS=Gallus gallus GN=SCARB2 PE=4 SV=1 - [E1BRR6_CHICK]	175.45	0.1705	1	6	6	9	481	53.9	5.57	-0.106117	0.240875
F1NAB5	Uncharacterized protein OS=Gallus gallus GN=RBP5 PE=4 SV=2 - [F1NAB5_CHICK]	42.58	0.0667	1	1	1	2	135	15.9	5.86	-0.291402	0.195176
R4GKU9	Uncharacterized protein OS=Gallus gallus GN=LACTB2 PE=4 SV=1 - [R4GKU9_CHICK]	175.86	0.3264	1	6	6	12	288	32.4	6.6	0.0163233	0.566286
F1NWE5	Uncharacterized protein (Fragment) OS=Gallus gallus GN=GALE PE=3 SV=2 - [F1NWE5_CHICK]	143.48	0.2135	1	5	5	9	356	39.1	6.86	-0.080603	0.399006
E1BZH9	Uncharacterized protein OS=Gallus gallus GN=HADH PE=4 SV=1 - [E1BZH9_CHICK]	422.83	0.5873	1	11	11	123	315	34.4	8.66	0.0981733	0.19129
F1NT51	Caldesmon OS=Gallus gallus GN=CALD1 PE=2 SV=2 - [F1NT51_CHICK]	292.18	0.1273	2	9	9	23	754	86.4	5.52	-0.0328215	0.890346
E1C0H5	Uncharacterized protein (Fragment) OS=Gallus gallus GN=LOC100859068 PE=3 SV=2 - [E1C0H5_CHICK]	725.27	0.3481	1	21	23	37	905	100.6	5.59	0.0092978	0.821719
E1BQI4	Uncharacterized protein (Fragment) OS=Gallus gallus PE=4 SV=2 - [E1BQI4_CHICK]	450.02	0.2914	1	12	12	36	477	51.2	8.85	0.0701018	0.328619
E1C7A7	Uncharacterized protein OS=Gallus gallus GN=VTN PE=4 SV=2 - [E1C7A7_CHICK]	401.47	0.2539	2	9	9	58	453	51.6	5.35	-0.121078	0.483648
B0M1D7	Quaking protein OS=Gallus gallus PE=2 SV=1 - [B0M1D7_CHICK]	67.34	0.1	3	3	3	4	340	37.6	8.56	0.130902	0.0419637
G4XPA9	SLCO1B3 (Fragment) OS=Gallus gallus PE=2 SV=1 - [G4XPA9_CHICK]	151.97	0.0617	3	3	3	15	665	72.9	8.32	0.156046	0.272451
F1P5Q3	Uncharacterized protein OS=Gallus gallus GN=THNSL2 PE=4 SV=2 - [F1P5Q3_CHICK]	190.59	0.1538	1	6	6	10	494	54.4	6.48	-0.148898	0.294737
F1NYT8	Uncharacterized protein OS=Gallus gallus GN=LOC426296 PE=4 SV=2 - [F1NYT8_CHICK]	209.35	0.3623	1	5	5	19	138	15.1	6.65	0.132619	0.611195
F1NC38	Uncharacterized protein OS=Gallus gallus GN=ACADL PE=2 SV=1 - [F1NC38_CHICK]	834.51	0.4733	2	19	19	150	431	47.8	8.15	-0.0724748	0.376315
F1N988	Clustered mitochondria protein homolog OS=Gallus gallus GN=KIAA0664 PE=3 SV=2 - [F1N988_CHICK]	159.2	0.0463	1	6	6	8	1339	150.4	6.1	-0.171105	0.121249
E1BTT7	Uncharacterized protein OS=Gallus gallus GN=GANC PE=4 SV=1 - [E1BTT7_CHICK]	552.83	0.2648	1	19	19	40	914	104.8	6.37	0.0305165	0.621438
R4GHH6	Uncharacterized protein OS=Gallus gallus GN=LOC100858617 PE=4 SV=1 - [R4GHH6_CHICK]	171.49	0.2163	1	5	5	15	245	27.5	5.44	0.101221	0.187611
F1NG43	Uncharacterized protein OS=Gallus gallus GN=LOC768709 PE=4 SV=2 - [F1NG43_CHICK]	360.27	0.5565	1	9	9	43	239	27.2	9.04	0.0442886	0.63351
F1NYJ6	Uncharacterized protein OS=Gallus gallus GN=GEMIN5 PE=4 SV=2 - [F1NYJ6_CHICK]	21.94	0.0046	1	1	1	1	1528	170.4	6.61	-0.0421043	0.717952
F1NA05	Uncharacterized protein OS=Gallus gallus GN=LOC425323 PE=4 SV=2 - [F1NA05_CHICK]	78.4	0.0166	1	3	4	5	3009	334.3	5.94	0.243154	0.0483846
Q5ZIE0	Uncharacterized protein OS=Gallus gallus GN=EIF5 PE=2 SV=1 - [Q5ZIE0_CHICK]	283.53	0.2581	1	9	9	23	430	49	5.34	-0.0999052	0.325638
F1NFP5	Arginine--tRNA ligase, cytoplasmic OS=Gallus gallus GN=RARS PE=3 SV=2 - [F1NFP5_CHICK]	344.09	0.2179	2	14	14	22	661	75.4	6.98	0.0876801	0.138666
F1NWG2	Uncharacterized protein (Fragment) OS=Gallus gallus GN=CTSC PE=3 SV=1 - [F1NWG2_CHICK]	343.21	0.2138	1	8	8	43	463	52	7.72	0.0788529	0.14249
E1C7L3	Uncharacterized protein OS=Gallus gallus GN=SQRDL PE=4 SV=1 - [E1C7L3_CHICK]	250.53	0.2378	1	7	7	13	450	49.9	9.23	-0.136222	0.214105
F1NXF1	Uncharacterized protein OS=Gallus gallus GN=KIAA0564 PE=4 SV=2 - [F1NXF1_CHICK]	636.43	0.1522	1	22	22	33	1905	213.4	7.05	0.0956771	0.152546
Q6EE60	60S ribosomal protein L18 (Fragment) OS=Gallus gallus PE=2 SV=1 - [Q6EE60_CHICK]	128.84	0.1807	1	2	2	15	166	18.8	11.84	0.117286	0.620393
Q5ZLW1	Uncharacterized protein OS=Gallus gallus GN=TARS PE=2 SV=1 - [Q5ZLW1_CHICK]	423.9	0.2222	1	12	13	31	711	81.8	6.83	0.108239	0.0148704
F1P372	Uncharacterized protein OS=Gallus gallus GN=TARSL2 PE=3 SV=2 - [F1P372_CHICK]	169.88	0.0574	1	3	4	10	784	90.2	6.99	0.034863	0.655095
R4GG96	Uncharacterized protein (Fragment) OS=Gallus gallus GN=LOC770407 PE=3 SV=1 - [R4GG96_CHICK]	135.36	0.0662	1	2	3	7	710	78.8	6.83	0.109098	0.348372
Q5ZKX2	Uncharacterized protein OS=Gallus gallus GN=PSMC6 PE=2 SV=1 - [Q5ZKX2_CHICK]	296.05	0.2751	2	8	8	20	389	44.1	7.2	0.0180195	0.727841
F1NZ25	Eukaryotic translation initiation factor 3 subunit B OS=Gallus gallus GN=EIF3B PE=3 SV=2 - [F1NZ25_CHICK]	225.64	0.1509	1	8	8	12	742	85.6	5.11	-0.0197348	0.778529
F1NNU4	Uncharacterized protein OS=Gallus gallus GN=NT5DC2 PE=3 SV=2 - [F1NNU4_CHICK]	40.99	0.0297	1	2	2	2	572	65.7	7.65	-0.0702068	0.778847
Q5ZLF9	Uncharacterized protein OS=Gallus gallus GN=RCJMB04_6g11 PE=2 SV=1 - [Q5ZLF9_CHICK]	77.67	0.1707	3	1	2	3	123	14.3	10.08	-0.148756	0.0958081
E1BX43	Uncharacterized protein OS=Gallus gallus GN=KNG1 PE=4 SV=2 - [E1BX43_CHICK]	117.92	0.0862	1	4	4	7	580	65.2	6.43	-0.116723	0.240532
E1BQG0	Uncharacterized protein OS=Gallus gallus GN=ABCC6 PE=3 SV=2 - [E1BQG0_CHICK]	210.32	0.0477	1	5	5	8	1509	169.3	6.86	0.150598	0.208856
F1NP51	Lamin-B2 OS=Gallus gallus GN=LMNB2 PE=2 SV=1 - [F1NP51_CHICK]	609.33	0.3417	2	15	17	44	600	67.9	5.27	-0.0179907	0.936833
E1C5W9	Uncharacterized protein OS=Gallus gallus GN=CRYM PE=4 SV=1 - [E1C5W9_CHICK]	420.84	0.4172	1	9	9	24	314	33.1	6.09	0.0158901	0.83096
D5M8S2	DJ-1 OS=Gallus gallus GN=DJ-1 PE=2 SV=1 - [D5M8S2_CHICK]	529.52	0.7725	2	13	14	115	189	19.9	6.77	0.105935	0.431902
F1N9S7	Annexin OS=Gallus gallus GN=ANXA1 PE=3 SV=1 - [F1N9S7_CHICK]	88.56	0.1053	3	2	3	11	342	38.5	7.44	-0.275257	0.0243546
Q5F346	Uncharacterized protein OS=Gallus gallus GN=RCJMB04_34p20 PE=2 SV=1 - [Q5F346_CHICK]	77.25	0.1377	1	3	3	5	138	15.9	12.04	-0.0418458	0.893795
F1NT57	Uncharacterized protein (Fragment) OS=Gallus gallus GN=AKR1B10 PE=4 SV=1 - [F1NT57_CHICK]	404.63	0.4722	2	4	13	49	324	36.4	7.17	0.0700203	0.628133
E1BVD1	Uncharacterized protein OS=Gallus gallus GN=Gga.7815 PE=4 SV=1 - [E1BVD1_CHICK]	741.73	0.7293	3	12	21	82	314	35.6	7.85	0.00159854	0.990947
E1C2R8	Uncharacterized protein (Fragment) OS=Gallus gallus GN=DDX17 PE=4 SV=2 - [E1C2R8_CHICK]	638.01	0.2737	2	10	17	47	676	75.1	8.72	-0.0458315	0.381675
F1NM08	Uncharacterized protein (Fragment) OS=Gallus gallus GN=DDX5 PE=4 SV=1 - [F1NM08_CHICK]	412.68	0.1916	3	4	11	34	595	66.7	8.76	0.14755	0.328086
Q5F491	Uncharacterized protein OS=Gallus gallus GN=RCJMB04_2a4 PE=2 SV=1 - [Q5F491_CHICK]	515.34	0.2473	2	11	12	33	651	72	6.99	-0.0273685	0.611802
F1NYQ3	Non-lysosomal glucosylceramidase OS=Gallus gallus GN=LOC100859407 PE=3 SV=2 - [F1NYQ3_CHICK]	22.15	0.0117	1	1	1	1	853	96	6.4	0.16399	0.724631
Q5ZJ61	Uncharacterized protein OS=Gallus gallus GN=FARSB PE=2 SV=1 - [Q5ZJ61_CHICK]	250.27	0.2292	1	12	12	18	589	65.9	6.39	0.0450527	0.742517
F1NIP5	Uncharacterized protein (Fragment) OS=Gallus gallus GN=PRPS1 PE=3 SV=2 - [F1NIP5_CHICK]	377.38	0.2813	1	2	8	56	327	35.4	6.92	-0.0503309	0.517412
E1C6R9	Uncharacterized protein OS=Gallus gallus GN=LOC770011 PE=4 SV=2 - [E1C6R9_CHICK]	263.92	0.5581	2	4	7	25	172	19.9	4.81	-0.14311	0.145989
Q5F3C9	SH3 domain-binding glutamic acid-rich-like protein OS=Gallus gallus GN=RCJMB04_21c16 PE=3 SV=1 - [Q5F3C9_CHICK]	119.63	0.4386	2	4	4	16	114	12.8	5.11	-0.041592	0.727183
Q8QH01	Dimethylaniline monooxygenase [N-oxide-forming] OS=Gallus gallus GN=FMO3 PE=2 SV=1 - [Q8QH01_CHICK]	880.85	0.6309	2	4	22	107	531	60.4	8.02	-0.0320907	0.758296
Q4L2A6	Flavin-containing monooxygenase 3 (Fragment) OS=Gallus gallus GN=FMO3 PE=4 SV=1 - [Q4L2A6_CHICK]	715.7	0.6418	1	1	19	94	483	55.1	8.38	0.176038	0.264282
E1BXS8	Uncharacterized protein OS=Gallus gallus PE=4 SV=2 - [E1BXS8_CHICK]	204.32	0.3527	1	6	6	16	224	25.5	5.8	0.2086	0.146303
R4GGR9	Uncharacterized protein OS=Gallus gallus GN=LOC100858454 PE=3 SV=1 - [R4GGR9_CHICK]	29.32	0.0707	4	1	1	3	99	10.1	10.24	-0.111317	0.523238
F1NP29	Uncharacterized protein (Fragment) OS=Gallus gallus GN=NIT2 PE=4 SV=2 - [F1NP29_CHICK]	510.94	0.6285	1	12	12	52	288	31.8	7.37	0.191794	0.0153355
R4GKX4	Uncharacterized protein (Fragment) OS=Gallus gallus PE=4 SV=1 - [R4GKX4_CHICK]	277.2	0.2863	3	4	7	39	234	25.5	8.97	0.119562	0.190467
F1NSB1	Uncharacterized protein (Fragment) OS=Gallus gallus GN=LOC424109 PE=4 SV=1 - [F1NSB1_CHICK]	57.12	0.1184	1	2	2	3	245	27.3	7.27	0.119811	0.322187
F1NI04	Uncharacterized protein OS=Gallus gallus GN=GNS PE=4 SV=2 - [F1NI04_CHICK]	141.69	0.0781	1	4	4	8	538	60.6	7.44	0.240457	0.00906091
E1C4C0	Acyl carrier protein OS=Gallus gallus GN=NDUFAB1 PE=3 SV=2 - [E1C4C0_CHICK]	110.52	0.2	1	4	4	15	150	16.5	5.22	0.0211279	0.825344
Q197X2	Apolipoprotein B OS=Gallus gallus GN=APOB PE=2 SV=1 - [Q197X2_CHICK]	1285.46	0.1317	2	46	46	92	4631	523	8.38	-0.0250539	0.718436
E1BWJ5	Ubiquitin carboxyl-terminal hydrolase OS=Gallus gallus GN=USP9X PE=2 SV=1 - [E1BWJ5_CHICK]	88.19	0.0223	2	4	4	5	2552	290	5.86	-0.131245	0.21352
F1P5P5	Uncharacterized protein OS=Gallus gallus GN=LOC772071 PE=4 SV=2 - [F1P5P5_CHICK]	37.48	0.0772	3	2	2	2	298	33.9	8.88	0.0591666	0.32478
E1BYP0	Uncharacterized protein OS=Gallus gallus GN=GGT5 PE=4 SV=1 - [E1BYP0_CHICK]	83.71	0.0721	1	3	3	4	569	61.7	8.56	-0.0592451	0.41689
F1NSA7	Uncharacterized protein OS=Gallus gallus GN=PML PE=4 SV=2 - [F1NSA7_CHICK]	178.21	0.09	2	5	5	5	767	86.3	5.58	-0.213018	0.141946
F1NGU3	Uncharacterized protein OS=Gallus gallus GN=LRPPRC PE=4 SV=2 - [F1NGU3_CHICK]	897.88	0.2334	3	29	29	58	1371	155.5	7.01	0.036042	0.661271
F1NVE5	Uncharacterized protein OS=Gallus gallus GN=XPO1 PE=4 SV=2 - [F1NVE5_CHICK]	183.38	0.0758	1	6	6	11	1069	122.8	6.11	-0.0262619	0.652144
Q5ZLE2	Aldehyde dehydrogenase OS=Gallus gallus GN=RCJMB04_6j4 PE=2 SV=1 - [Q5ZLE2_CHICK]	461.35	0.2592	1	1	9	45	490	54	8.15	-0.0810741	0.641211
F1NH33	Aldehyde dehydrogenase OS=Gallus gallus GN=ALDH3A2 PE=3 SV=1 - [F1NH33_CHICK]	478.31	0.2857	1	3	11	44	490	54.1	8.02	-0.0652646	0.653522
E1BZT9	Uncharacterized protein OS=Gallus gallus GN=LOC423347 PE=4 SV=2 - [E1BZT9_CHICK]	435.4	0.3185	2	11	11	37	518	57.7	6.6	0.0551712	0.682467
Q5ZIP7	Uncharacterized protein OS=Gallus gallus GN=RAB5A PE=2 SV=1 - [Q5ZIP7_CHICK]	129.94	0.2047	1	1	3	10	215	23.5	8.13	-0.0653313	0.81706
R4GIC4	Uncharacterized protein OS=Gallus gallus PE=3 SV=1 - [R4GIC4_CHICK]	106.54	0.2458	2	2	3	9	179	19.7	6	0.191225	0.00774692
E1BUR2	Uncharacterized protein OS=Gallus gallus GN=FCHO2 PE=4 SV=2 - [E1BUR2_CHICK]	59.11	0.1396	4	2	3	4	265	30.5	7.97	-0.00450013	0.92568
F1NIQ3	Sister chromatid cohesion protein PDS5 homolog A OS=Gallus gallus GN=PDS5A PE=4 SV=1 - [F1NIQ3_CHICK]	27.04	0.0068	2	1	1	1	1330	150	7.83	0.0531338	0.689845
E1C6W3	Uncharacterized protein OS=Gallus gallus GN=OXSR1 PE=4 SV=1 - [E1C6W3_CHICK]	178.08	0.1238	1	4	4	8	533	58.1	6.34	0.0735804	0.389467
F1P332	Uncharacterized protein OS=Gallus gallus GN=LOC429115 PE=4 SV=1 - [F1P332_CHICK]	57.72	0.0429	2	2	2	2	606	65.8	7.46	0.044436	0.619163
E1C5N0	Uncharacterized protein OS=Gallus gallus GN=PPFIA1 PE=4 SV=2 - [E1C5N0_CHICK]	101.9	0.0379	1	4	4	4	1240	140.5	6.35	0.0904813	0.423096
Q5ZM94	Uncharacterized protein OS=Gallus gallus GN=RCJMB04_2m19 PE=2 SV=1 - [Q5ZM94_CHICK]	305.12	0.4672	2	7	7	40	259	27.4	8.24	-0.0354347	0.139762
Q5F3D2	Uncharacterized protein OS=Gallus gallus GN=HNRNPH3 PE=2 SV=1 - [Q5F3D2_CHICK]	304.25	0.3392	1	7	9	43	342	36.6	7.12	0.0335112	0.785023
E1BWS3	Uncharacterized protein OS=Gallus gallus GN=FAM49B PE=4 SV=2 - [E1BWS3_CHICK]	84.15	0.0741	1	2	2	5	324	36.8	6.46	0.106601	0.342778
H9KZK0	Uncharacterized protein (Fragment) OS=Gallus gallus PE=4 SV=1 - [H9KZK0_CHICK]	681.69	0.1241	1	16	16	49	2135	229	5.21	0.0905855	0.195247
F1N8D4	Uncharacterized protein OS=Gallus gallus GN=FLNB PE=4 SV=2 - [F1N8D4_CHICK]	1944.25	0.2996	4	9	56	136	2580	277	5.82	-0.0194443	0.86829
E1BVB1	Uncharacterized protein OS=Gallus gallus GN=RPL32 PE=4 SV=2 - [E1BVB1_CHICK]	89.69	0.2222	1	3	3	6	135	15.9	11.36	-0.0195918	0.966741
E1C1I6	Uncharacterized protein OS=Gallus gallus GN=LOC425137 PE=2 SV=2 - [E1C1I6_CHICK]	451.68	0.4241	2	2	12	57	316	35.9	7.3	-0.0375938	0.890025
R4GG24	Uncharacterized protein OS=Gallus gallus GN=LOC425137 PE=4 SV=1 - [R4GG24_CHICK]	381.45	0.3892	2	1	13	57	316	35.8	7.56	-0.03631	0.915032
E1BWB9	Uncharacterized protein OS=Gallus gallus GN=Gga.55708 PE=4 SV=2 - [E1BWB9_CHICK]	122.84	0.0357	1	4	4	14	1317	143.5	5.68	0.01357	0.933185
R4GLK3	Uncharacterized protein OS=Gallus gallus GN=LOC100857577 PE=4 SV=1 - [R4GLK3_CHICK]	79.11	0.1081	3	3	3	5	370	39.8	4.81	0.00694426	0.934546
F1NBU5	Uncharacterized protein (Fragment) OS=Gallus gallus GN=ATP5S PE=4 SV=1 - [F1NBU5_CHICK]	65.93	0.115	1	2	2	3	200	22.8	7.97	-0.105646	0.261012
F1NXD7	Uncharacterized protein OS=Gallus gallus PE=4 SV=2 - [F1NXD7_CHICK]	183.11	0.0727	1	5	6	12	990	110.1	5.38	-0.0584324	0.225953
F1P0J0	Uncharacterized protein OS=Gallus gallus GN=GFM1 PE=2 SV=2 - [F1P0J0_CHICK]	192.15	0.1531	2	9	9	13	738	82.4	7.18	-0.028252	0.526195
H9KZU6	Uncharacterized protein OS=Gallus gallus GN=SCRN2 PE=4 SV=2 - [H9KZU6_CHICK]	107.83	0.0857	1	3	3	9	420	46.3	6.54	0.0912065	0.180649
F1P1V2	Uncharacterized protein OS=Gallus gallus GN=PUF60 PE=4 SV=2 - [F1P1V2_CHICK]	105.56	0.0989	3	4	4	5	465	50.3	5.24	-0.0606349	0.00112425
Q45QT1	Soluble epoxide hydrolase OS=Gallus gallus GN=EPHX2 PE=2 SV=1 - [Q45QT1_CHICK]	757.54	0.4982	1	20	20	63	562	63.2	6.29	-0.0568615	0.535123
F1NMS5	Uncharacterized protein (Fragment) OS=Gallus gallus PE=4 SV=2 - [F1NMS5_CHICK]	34.49	0.125	2	1	1	1	72	8.3	6.61	-0.166557	0.0632195
F1P1K3	Uncharacterized protein (Fragment) OS=Gallus gallus GN=LOC100857636 PE=4 SV=2 - [F1P1K3_CHICK]	216.58	0.1706	2	6	6	25	381	42.5	9.03	-0.0437967	0.624225
F1NB64	Uncharacterized protein OS=Gallus gallus GN=ACAA1 PE=3 SV=2 - [F1NB64_CHICK]	839.15	0.581	1	18	18	104	432	44.6	9.09	0.0778448	0.254636
F1NJX8	Uncharacterized protein OS=Gallus gallus GN=FNTA PE=4 SV=2 - [F1NJX8_CHICK]	67.05	0.0506	1	2	2	2	356	42	4.78	0.0417712	0.640357
F1NKB6	6-phosphofructokinase OS=Gallus gallus GN=PFKL PE=2 SV=2 - [F1NKB6_CHICK]	722.1	0.339	2	15	16	58	770	84	7.43	-0.0444493	0.625964
F1NIF0	Uncharacterized protein OS=Gallus gallus GN=CA9 PE=4 SV=2 - [F1NIF0_CHICK]	84.15	0.1117	1	3	3	6	367	40.8	6.68	-0.12561	0.406719
E1C1X1	Uncharacterized protein OS=Gallus gallus GN=TMEM126A PE=4 SV=2 - [E1C1X1_CHICK]	29	0.0529	1	1	1	1	208	23.1	9.29	#NUM!	#NUM!
E1BQA5	Uncharacterized protein OS=Gallus gallus GN=CPNE3 PE=4 SV=1 - [E1BQA5_CHICK]	315.24	0.1818	4	6	7	17	539	60.4	5.83	0.0251866	0.797221
F1NZH6	Uncharacterized protein OS=Gallus gallus GN=PECR PE=4 SV=1 - [F1NZH6_CHICK]	268.96	0.2425	2	7	7	12	301	31.8	8.72	0.0471019	0.5714
F1P4V6	Uncharacterized protein (Fragment) OS=Gallus gallus GN=RPL31 PE=4 SV=2 - [F1P4V6_CHICK]	217.49	0.3047	1	4	4	21	128	14.7	10.54	-0.159689	0.685041
R4GJV6	Uncharacterized protein OS=Gallus gallus GN=LOC100857973 PE=4 SV=1 - [R4GJV6_CHICK]	115.94	0.3193	1	3	5	8	166	17.7	4.88	0.336698	0.140939
E1C460	Uncharacterized protein OS=Gallus gallus GN=PBLD PE=4 SV=1 - [E1C460_CHICK]	342.12	0.2917	1	8	8	33	288	32.2	7.21	0.025555	0.794274
F1ND23	Uncharacterized protein (Fragment) OS=Gallus gallus GN=NDUFS3 PE=3 SV=2 - [F1ND23_CHICK]	529.33	0.4864	1	11	11	53	257	29.2	6.42	-0.0230954	0.72895
F1NYT7	Uncharacterized protein (Fragment) OS=Gallus gallus GN=PCYOX1 PE=4 SV=2 - [F1NYT7_CHICK]	238.7	0.1542	1	5	5	8	506	56.4	7.62	0.133412	0.0438688
F1NFE0	Collagen alpha-1(VI) chain OS=Gallus gallus GN=COL6A1 PE=4 SV=2 - [F1NFE0_CHICK]	486.58	0.2257	2	15	15	37	1019	107.9	5.9	-0.228533	0.172195
F1NNH9	Uncharacterized protein OS=Gallus gallus GN=TOMM70A PE=4 SV=2 - [F1NNH9_CHICK]	381.18	0.245	1	12	12	24	653	72.5	7.78	0.0385656	0.553355
F1NK38	T-complex protein 1 subunit eta OS=Gallus gallus GN=CCT7 PE=3 SV=2 - [F1NK38_CHICK]	868.23	0.5172	2	20	20	76	551	60	6.09	0.00100805	0.956011
F1NGM0	Uncharacterized protein OS=Gallus gallus GN=EHD3 PE=4 SV=1 - [F1NGM0_CHICK]	542.11	0.5047	3	18	18	44	535	60.9	6.51	0.0993173	0.058473
F1NQC6	Uncharacterized protein OS=Gallus gallus GN=DHTKD1 PE=4 SV=2 - [F1NQC6_CHICK]	422.95	0.18	1	11	11	21	922	103	6.79	-0.110496	0.251758
E1C4W1	Uncharacterized protein OS=Gallus gallus GN=LOC424677 PE=3 SV=2 - [E1C4W1_CHICK]	57.08	0.0591	3	2	2	9	491	56.4	7.72	0.101978	0.0898866
F1P1M1	Uncharacterized protein OS=Gallus gallus GN=LOC771130 PE=3 SV=2 - [F1P1M1_CHICK]	271.25	0.2237	1	6	8	35	532	60	8.19	0.187291	0.313458
F1NXV4	Uncharacterized protein OS=Gallus gallus GN=SRPR PE=4 SV=1 - [F1NXV4_CHICK]	131.3	0.0978	2	5	5	8	644	71.2	8.98	-0.0597145	0.450027
F1NN51	Uncharacterized protein (Fragment) OS=Gallus gallus GN=FXR1 PE=2 SV=1 - [F1NN51_CHICK]	52.32	0.0379	2	2	2	2	633	70.9	5.97	-0.1706	0.257497
E1BTJ1	Glycylpeptide N-tetradecanoyltransferase OS=Gallus gallus GN=NMT2 PE=3 SV=1 - [E1BTJ1_CHICK]	112.44	0.1185	1	3	3	5	498	56.8	7.53	0.0501614	0.559274
E1C4M6	Ubiquitin carboxyl-terminal hydrolase (Fragment) OS=Gallus gallus GN=USP14 PE=3 SV=2 - [E1C4M6_CHICK]	69.55	0.0475	1	2	2	6	505	56.7	5.2	-0.0136312	0.88696
F1NJF0	Uncharacterized protein (Fragment) OS=Gallus gallus GN=C1QBP PE=4 SV=2 - [F1NJF0_CHICK]	257.4	0.4541	2	6	6	35	207	23.5	4.48	-0.0801145	0.419396
F1NIE1	Mannose-6-phosphate isomerase (Fragment) OS=Gallus gallus GN=MPI PE=3 SV=2 - [F1NIE1_CHICK]	80.01	0.0448	1	2	2	5	424	45.9	6.33	-0.0196821	0.897076
Q5ZI39	Uncharacterized protein OS=Gallus gallus GN=PLS3 PE=2 SV=1 - [Q5ZI39_CHICK]	624.19	0.336	1	12	16	71	628	70.8	5.74	0.158029	0.025813
R4GI40	LDLR chaperone MESD OS=Gallus gallus GN=MESDC2 PE=4 SV=1 - [R4GI40_CHICK]	56.26	0.1644	3	3	3	5	219	24.5	7.37	-0.078404	0.495893
F1P331	Uncharacterized protein (Fragment) OS=Gallus gallus GN=AKR7A2 PE=4 SV=1 - [F1P331_CHICK]	705.38	0.4632	1	14	14	118	367	40.9	8.47	0.13455	0.18543
Q5ZMK9	Uncharacterized protein OS=Gallus gallus GN=RCJMB04_1l21 PE=2 SV=1 - [Q5ZMK9_CHICK]	792.21	0.5905	2	20	20	146	359	40.1	6.46	0.0957176	0.192488
Q5F412	Uncharacterized protein OS=Gallus gallus GN=RCJMB04_3n18 PE=4 SV=1 - [Q5F412_CHICK]	122.21	0.4494	3	2	3	10	89	10.3	7.44	0.0665779	0.238432
F1NX83	Uncharacterized protein OS=Gallus gallus GN=AGL PE=4 SV=2 - [F1NX83_CHICK]	542.64	0.1444	1	16	16	29	1530	174.3	7.01	0.0658676	0.42186
F1NF35	Uncharacterized protein (Fragment) OS=Gallus gallus GN=IVD PE=3 SV=1 - [F1NF35_CHICK]	361.66	0.3231	1	11	11	25	424	46	8.15	-0.0255774	0.619779
R4GJK6	Uncharacterized protein (Fragment) OS=Gallus gallus GN=Gga.32618 PE=4 SV=1 - [R4GJK6_CHICK]	52.76	0.0424	1	3	3	3	1132	122.7	6.86	-0.108244	0.1558
Q5ZLI2	Proteasome subunit alpha type OS=Gallus gallus GN=PSMA3 PE=2 SV=1 - [Q5ZLI2_CHICK]	150.51	0.1843	1	5	5	10	255	28.5	5.05	0.0507098	0.625135
F1NPU2	Uncharacterized protein OS=Gallus gallus GN=CRYL1 PE=2 SV=2 - [F1NPU2_CHICK]	327.16	0.481	3	9	9	21	316	34.9	6.79	0.0794577	0.461364
A9CP13	D-serine dehydratase (Fragment) OS=Gallus gallus GN=chDSD PE=1 SV=1 - [A9CP13_CHICK]	284.06	0.3059	2	8	8	18	376	40.4	7.72	0.122873	0.118027
F1P3U1	Uncharacterized protein OS=Gallus gallus GN=IMMT PE=4 SV=1 - [F1P3U1_CHICK]	1175.24	0.4669	2	30	30	82	711	79.2	6.01	-0.00918123	0.910925
Q5ZI85	Uncharacterized protein OS=Gallus gallus GN=RCJMB04_29f20 PE=2 SV=1 - [Q5ZI85_CHICK]	175.03	0.5347	2	5	5	10	144	16.1	5.08	-0.122604	0.00011025
O93468	GTP-binding protein OS=Gallus gallus GN=cRhoB PE=2 SV=1 - [O93468_CHICK]	143.22	0.2551	1	1	3	11	196	22.2	5.24	-0.117951	0.216287
F1P257	Uncharacterized protein OS=Gallus gallus GN=TPP2 PE=4 SV=2 - [F1P257_CHICK]	87.01	0.0421	1	3	3	3	1305	144.1	6.57	-0.0673087	0.660461
F1P399	Isoleucine--tRNA ligase, mitochondrial OS=Gallus gallus GN=IARS2 PE=2 SV=1 - [F1P399_CHICK]	391.09	0.18	2	12	12	17	1000	111.9	6.89	-0.0904032	0.183568
E1BXC2	Uncharacterized protein (Fragment) OS=Gallus gallus GN=ESD PE=4 SV=2 - [E1BXC2_CHICK]	446.77	0.4742	1	10	10	37	329	36.9	7.64	0.24262	0.0488606
E1C3I7	Calcium/calmodulin-dependent protein kinase type II delta chain (Fragment) OS=Gallus gallus GN=CAMK2D PE=4 SV=2 - [E1C3I7_CHICK]	202.84	0.2271	10	7	7	11	458	51.8	7.58	-0.0549993	0.49361
E1C7P4	Uncharacterized protein OS=Gallus gallus GN=CFH PE=4 SV=2 - [E1C7P4_CHICK]	353.31	0.1164	1	12	12	25	1306	147.8	7.05	-0.0540429	0.649265
Q5ZK51	Golgi SNAP receptor complex member 1 OS=Gallus gallus GN=RCJMB04_13c23 PE=2 SV=1 - [Q5ZK51_CHICK]	53.83	0.1481	2	3	3	4	243	27.7	9.35	0.0586638	0.717574
H9KZ88	Guanine nucleotide-binding protein G(i) subunit alpha-2 (Fragment) OS=Gallus gallus GN=GNAI2 PE=4 SV=2 - [H9KZ88_CHICK]	289.82	0.2971	11	5	8	19	340	39	5.76	-0.0342986	0.49609
Q90846	G protein OS=Gallus gallus GN=Galpa i3-o PE=2 SV=1 - [Q90846_CHICK]	148.92	0.1271	12	1	4	11	354	40.4	5.68	0.00330107	0.98084
E1BQW1	Uncharacterized protein OS=Gallus gallus GN=NAPB PE=4 SV=1 - [E1BQW1_CHICK]	30.88	0.0372	1	1	1	1	296	33.3	5.58	#NUM!	#NUM!
E1BQ86	Uncharacterized protein OS=Gallus gallus PE=4 SV=2 - [E1BQ86_CHICK]	24.08	0.0097	1	1	1	1	932	105.4	7.06	-0.078036	0.76262
F1NHL2	Uncharacterized protein OS=Gallus gallus GN=CAND1 PE=4 SV=2 - [F1NHL2_CHICK]	561.7	0.2272	1	20	20	38	1206	133.5	5.74	0.0404533	0.368807
F6RHH1	Importin subunit alpha (Fragment) OS=Gallus gallus GN=KPNA4 PE=3 SV=1 - [F6RHH1_CHICK]	210.75	0.1764	4	5	5	5	499	55.2	4.88	0.0821204	0.0600928
Q5ZJV5	Uncharacterized protein OS=Gallus gallus GN=COX4I1 PE=2 SV=1 - [Q5ZJV5_CHICK]	283.5	0.386	1	7	7	41	171	19.6	8.87	-0.0592004	0.607984
F1P2D2	Uncharacterized protein OS=Gallus gallus GN=BPNT1 PE=2 SV=1 - [F1P2D2_CHICK]	361.38	0.4104	2	11	11	29	307	32.9	5.87	0.0923278	0.0684566
F1P1X9	Casein kinase I isoform epsilon OS=Gallus gallus GN=DBT PE=3 SV=1 - [F1P1X9_CHICK]	423.56	0.3651	2	12	12	39	493	54.1	8.56	0.0558542	0.381204
F1NPR8	Uncharacterized protein OS=Gallus gallus GN=PAPSS2 PE=3 SV=2 - [F1NPR8_CHICK]	500.95	0.2899	1	12	13	19	621	69.4	7.81	-0.270435	0.135357
Q5ZM95	Uncharacterized protein OS=Gallus gallus GN=RCJMB04_2m14 PE=2 SV=1 - [Q5ZM95_CHICK]	285.61	0.2256	4	6	8	42	492	53.6	5.95	-0.056579	0.31143
F1NF89	40S ribosomal protein S24 OS=Gallus gallus GN=RPS24 PE=3 SV=2 - [F1NF89_CHICK]	133.51	0.3407	1	4	4	15	135	15.6	10.78	-0.230965	0.590126
R4GK96	Uncharacterized protein OS=Gallus gallus GN=NDUFS4 PE=4 SV=1 - [R4GK96_CHICK]	269.5	0.4727	3	6	6	21	165	18.6	9.88	0.00251974	0.980482
F1NMN3	Uncharacterized protein OS=Gallus gallus GN=LACTB PE=4 SV=1 - [F1NMN3_CHICK]	344.94	0.3019	2	11	11	26	520	57.9	8.9	0.0697492	0.105767
R4GGJ0	Uncharacterized protein OS=Gallus gallus GN=RPS16 PE=3 SV=1 - [R4GGJ0_CHICK]	137.12	0.3562	1	5	5	20	146	16.4	10.21	-0.123965	0.632785
Q5ZHR7	Uncharacterized protein OS=Gallus gallus GN=CLTA PE=2 SV=1 - [Q5ZHR7_CHICK]	124.9	0.1814	1	2	3	14	215	23.7	4.5	0.00265315	0.99269
F1NCC9	Uncharacterized protein OS=Gallus gallus GN=SMARCE1 PE=4 SV=1 - [F1NCC9_CHICK]	73.28	0.068	2	2	2	2	412	46.7	4.88	-0.116757	0.257403
Q5ZKG4	Uncharacterized protein OS=Gallus gallus GN=RCJMB04_11a8 PE=2 SV=1 - [Q5ZKG4_CHICK]	38.89	0.0625	4	1	1	4	160	18.4	9.99	0.027632	0.816914
E1BXS5	Uncharacterized protein OS=Gallus gallus GN=DECR1 PE=4 SV=1 - [E1BXS5_CHICK]	592.66	0.4524	1	14	14	114	336	35.7	9.39	-0.0187825	0.837092
F1NQJ1	Uncharacterized protein OS=Gallus gallus GN=AGXT2 PE=3 SV=2 - [F1NQJ1_CHICK]	334.18	0.3038	1	11	11	26	497	55.1	8.05	-0.216105	0.0125437
Q5ZLW7	Uncharacterized protein OS=Gallus gallus GN=LUC7L2 PE=2 SV=1 - [Q5ZLW7_CHICK]	113.95	0.1407	1	4	4	7	398	47.2	10.13	-0.117776	0.634254
F1NMB3	Uncharacterized protein OS=Gallus gallus GN=Gga.29991 PE=3 SV=2 - [F1NMB3_CHICK]	142.63	0.1259	1	6	6	8	532	60.8	6.93	-0.0589722	0.622295
F1NCJ8	Uncharacterized protein OS=Gallus gallus GN=AS3MT PE=4 SV=2 - [F1NCJ8_CHICK]	275.08	0.2408	1	6	6	17	382	41.9	5.73	-0.0113751	0.911573
E1BSH9	Uncharacterized protein OS=Gallus gallus GN=BHMT PE=3 SV=1 - [E1BSH9_CHICK]	990.3	0.6617	1	20	20	429	405	45	7.64	-0.0224268	0.805325
R4GKF5	Uncharacterized protein OS=Gallus gallus GN=LOC100859485 PE=3 SV=1 - [R4GKF5_CHICK]	125.94	0.1659	1	4	4	18	205	23	9.35	-0.0217109	0.706387
E1C658	Uncharacterized protein (Fragment) OS=Gallus gallus GN=ATP5H PE=4 SV=2 - [E1C658_CHICK]	407.79	0.7037	1	10	10	61	162	18.4	8.78	0.595144	0.152327
E1BUP6	Uncharacterized protein (Fragment) OS=Gallus gallus GN=PDIA5 PE=4 SV=2 - [E1BUP6_CHICK]	434.61	0.3515	1	15	15	35	532	61.1	8.15	0.0291008	0.787379
E1C8W3	Uncharacterized protein OS=Gallus gallus GN=ENDOD1 PE=4 SV=2 - [E1C8W3_CHICK]	24.87	0.0208	1	1	1	2	480	52.5	5.92	0.0954163	0.403451
F1NNI2	Lon protease homolog (Fragment) OS=Gallus gallus GN=LONP1 PE=3 SV=2 - [F1NNI2_CHICK]	612.6	0.3195	1	19	19	42	845	95.1	6.09	-0.0275692	0.714933
E1C250	Uncharacterized protein OS=Gallus gallus GN=KANK4 PE=4 SV=1 - [E1C250_CHICK]	56.57	0.0123	1	1	1	1	976	104.8	5.17	#NUM!	#NUM!
H9L369	Uncharacterized protein OS=Gallus gallus GN=HDGF PE=4 SV=2 - [H9L369_CHICK]	250.54	0.4009	1	9	9	28	232	26.2	5.16	0.024254	0.855131
E1BY32	Uncharacterized protein (Fragment) OS=Gallus gallus GN=CYP2B7P1 PE=3 SV=2 - [E1BY32_CHICK]	196.19	0.1526	1	5	6	25	498	57.2	9.1	-0.00777415	0.966545
F1P574	Uncharacterized protein OS=Gallus gallus GN=GMPPB PE=4 SV=2 - [F1P574_CHICK]	289.92	0.2861	1	6	6	15	360	39.4	7.2	-0.0394948	0.711618
Q8UWC5	Nuclear protein matrin 3 OS=Gallus gallus GN=MATR3 PE=2 SV=1 - [Q8UWC5_CHICK]	79.07	0.0621	1	4	4	4	902	100.7	6.15	-0.00276367	0.982483
E2JF33	MHC class II antigen (Fragment) OS=Gallus gallus GN=BLB2 PE=2 SV=1 - [E2JF33_CHICK]	162.55	0.2361	115	4	4	13	233	26.4	6.23	-0.347769	0.0670798
F1NJT4	Fibronectin OS=Gallus gallus GN=FN1 PE=4 SV=2 - [F1NJT4_CHICK]	1359.07	0.2165	4	33	33	92	2360	259	6.11	-0.175419	0.08788
F1NR47	Uncharacterized protein OS=Gallus gallus GN=TTPA PE=4 SV=2 - [F1NR47_CHICK]	276.52	0.4007	1	8	8	19	277	31.4	8.88	0.0423217	0.478962
Q5ZMH8	Uncharacterized protein OS=Gallus gallus GN=NANS PE=2 SV=1 - [Q5ZMH8_CHICK]	206.43	0.1532	2	5	5	17	359	40.1	7.44	0.137468	0.54945
E1C6N5	Uncharacterized protein OS=Gallus gallus GN=DLAT PE=3 SV=1 - [E1C6N5_CHICK]	834.69	0.4335	1	20	20	138	632	66.5	7.84	-0.103086	0.0118509
F1NWN8	Uncharacterized protein OS=Gallus gallus GN=MTHFS PE=4 SV=2 - [F1NWN8_CHICK]	100.9	0.2286	1	3	3	6	210	23.5	6.92	-0.0545023	0.708081
E1C9F4	Uncharacterized protein OS=Gallus gallus GN=PSPH PE=4 SV=1 - [E1C9F4_CHICK]	162.84	0.2566	1	6	6	11	226	25.1	6.4	0.221069	0.246225
E1BXI3	Uncharacterized protein OS=Gallus gallus GN=PDCD5 PE=4 SV=1 - [E1BXI3_CHICK]	117.09	0.1984	1	2	2	4	126	14.2	5.67	0.108449	0.450439
F1NVH4	Uncharacterized protein OS=Gallus gallus GN=PSMD9 PE=4 SV=1 - [F1NVH4_CHICK]	56.86	0.1159	2	2	2	2	207	22.7	6.95	0.160972	0.602278
E1C4N0	Uncharacterized protein OS=Gallus gallus GN=RPS10 PE=4 SV=2 - [E1C4N0_CHICK]	88.09	0.2	1	3	3	12	165	18.9	10.15	-0.11711	0.532101
R4GFN8	Uncharacterized protein (Fragment) OS=Gallus gallus GN=C3H6orf211 PE=4 SV=1 - [R4GFN8_CHICK]	40.19	0.0563	1	2	2	5	426	49.1	6.05	0.0725849	0.636622
H9KYV1	Uncharacterized protein OS=Gallus gallus GN=FAHD2A PE=4 SV=2 - [H9KYV1_CHICK]	133.72	0.2289	1	5	5	17	249	27.4	7.06	-0.0125735	0.672584
U6C3W5	EW135 OS=Gallus gallus PE=2 SV=1 - [U6C3W5_CHICK]	229.46	0.1641	2	3	8	12	987	104.3	4.92	-0.163324	0.0706015
H9KZK9	Uncharacterized protein OS=Gallus gallus PE=4 SV=2 - [H9KZK9_CHICK]	151.51	0.2135	1	1	6	8	459	48.7	5.29	-0.502333	0.000591206
F1P1S6	Actin-related protein 2/3 complex subunit 5 (Fragment) OS=Gallus gallus PE=3 SV=1 - [F1P1S6_CHICK]	69.14	0.1944	1	2	2	3	108	11.8	10.15	0.103813	0.356948
F1NRQ6	Uncharacterized protein OS=Gallus gallus GN=GK PE=3 SV=2 - [F1NRQ6_CHICK]	619.64	0.4793	1	17	17	38	532	58.5	6.11	-0.0403323	0.378264
A1E345	Junctional adhesion protein A OS=Gallus gallus GN=F11R PE=2 SV=1 - [A1E345_CHICK]	104.77	0.0881	1	2	2	5	295	31.8	8.7	-0.15962	0.0389647
B6RCM6	MHC class II antigen alpha OS=Gallus gallus PE=2 SV=1 - [B6RCM6_CHICK]	110.72	0.2353	18	3	3	8	255	28	5.16	-0.0964983	0.263881
F6SU35	Ribosomal protein OS=Gallus gallus GN=RPL10A PE=3 SV=1 - [F6SU35_CHICK]	312.8	0.3871	2	8	8	45	217	24.7	9.88	0.0712799	0.650517
G1K303	Hydroxyacylglutathione hydrolase, mitochondrial OS=Gallus gallus GN=HAGH PE=3 SV=2 - [G1K303_CHICK]	236.78	0.2871	2	6	6	25	310	34.2	7.81	0.0713013	0.653486
F1NAY8	Uncharacterized protein (Fragment) OS=Gallus gallus GN=MVD PE=4 SV=2 - [F1NAY8_CHICK]	367.86	0.3184	1	8	8	38	402	43.9	7.03	-0.0953297	0.0633851
E7EDS8	Fatty acid desaturase 1 OS=Gallus gallus GN=FADS1 PE=2 SV=1 - [E7EDS8_CHICK]	83.72	0.0998	2	3	3	3	441	52	9.1	0.309525	0.00504709
R4GF38	Uncharacterized protein (Fragment) OS=Gallus gallus GN=LOC422154 PE=4 SV=1 - [R4GF38_CHICK]	88.37	0.1204	1	2	2	4	274	30.8	8.28	0.0649033	0.14848
F1NU16	Uncharacterized protein OS=Gallus gallus GN=SF3A1 PE=4 SV=1 - [F1NU16_CHICK]	61.81	0.038	2	3	3	4	790	88.4	5.12	0.00386874	0.943696
F1NKY6	Uncharacterized protein OS=Gallus gallus GN=LOC100859021 PE=4 SV=2 - [F1NKY6_CHICK]	362.67	0.1989	4	6	7	17	533	59.7	5.72	0.0288927	0.814847
F1P4K4	Uncharacterized protein OS=Gallus gallus GN=ALDH8A1 PE=3 SV=2 - [F1P4K4_CHICK]	728.96	0.5647	1	17	18	68	487	53.2	7.83	0.112898	0.0645287
F1P360	Uncharacterized protein OS=Gallus gallus GN=CKAP4 PE=4 SV=2 - [F1P360_CHICK]	280.85	0.2224	3	9	9	17	499	56.8	5.03	0.0374254	0.721007
F1NNN4	Uncharacterized protein OS=Gallus gallus GN=LOC771974 PE=3 SV=2 - [F1NNN4_CHICK]	368.37	0.2742	1	10	11	29	507	58.7	8.25	0.102329	0.279389
F1NYI3	tRNA-splicing ligase RtcB homolog OS=Gallus gallus GN=C1H22orf28 PE=3 SV=2 - [F1NYI3_CHICK]	392.56	0.2911	1	13	13	24	505	55.2	7.24	0.0367234	0.651869
F1N9P5	Uncharacterized protein OS=Gallus gallus GN=ABCD4 PE=3 SV=2 - [F1N9P5_CHICK]	42.02	0.0227	1	1	1	1	572	64.9	5.78	#NUM!	#NUM!
F1NZK8	Uncharacterized protein OS=Gallus gallus GN=EFTUD1 PE=4 SV=1 - [F1NZK8_CHICK]	92.32	0.0705	2	3	3	3	723	80.7	5.83	0.0595352	0.629117
Q5ZIT7	Uncharacterized protein OS=Gallus gallus GN=PSMC3 PE=2 SV=1 - [Q5ZIT7_CHICK]	464.51	0.4431	1	13	13	32	422	47.2	5.22	0.0646428	0.372285
E1BWG7	Uncharacterized protein OS=Gallus gallus GN=PTER PE=4 SV=2 - [E1BWG7_CHICK]	210.57	0.2157	1	8	8	14	357	39.9	6.67	0.0443328	0.216817
E1BT59	Uncharacterized protein OS=Gallus gallus GN=ENG PE=4 SV=2 - [E1BT59_CHICK]	137.64	0.0761	2	4	4	5	644	70.9	7.84	-0.19601	0.0877454
F1NE88	Ubiquitin carboxyl-terminal hydrolase OS=Gallus gallus GN=USP4 PE=3 SV=1 - [F1NE88_CHICK]	74.12	0.0395	2	3	3	5	963	107.4	5.83	-0.0504609	0.183165
E1C8I7	Uncharacterized protein OS=Gallus gallus PE=4 SV=2 - [E1C8I7_CHICK]	258.2	0.3569	1	8	8	38	311	35.5	8.16	0.165907	0.0473512
R4GH86	Glutathione peroxidase (Fragment) OS=Gallus gallus GN=LOC100857115 PE=3 SV=1 - [R4GH86_CHICK]	210.62	0.5974	2	6	6	23	154	17.9	6.92	0.109097	0.584988
F1P3I8	Amidophosphoribosyltransferase OS=Gallus gallus GN=PPAT PE=3 SV=1 - [F1P3I8_CHICK]	276.74	0.2706	3	10	10	26	510	56.2	6.65	-0.0631236	0.653603
Q5ZKD0	Uncharacterized protein OS=Gallus gallus GN=LPGAT1 PE=2 SV=1 - [Q5ZKD0_CHICK]	78.37	0.127	1	3	3	5	370	42.6	8.54	-0.0401274	0.749914
E1C6M9	Cadherin-1 OS=Gallus gallus GN=CDH1 PE=3 SV=2 - [E1C6M9_CHICK]	284.75	0.1184	2	8	8	17	887	97.7	5.17	-0.0287709	0.725545
F1NQ58	Uncharacterized protein (Fragment) OS=Gallus gallus PE=4 SV=2 - [F1NQ58_CHICK]	20.18	0.036	1	1	1	1	250	27.4	9.61	-0.0634108	0.396269
E1BSP1	Proactivator polypeptide OS=Gallus gallus GN=PSAP PE=4 SV=1 - [E1BSP1_CHICK]	205.41	0.1293	3	6	6	25	518	57.5	5.16	-0.0849598	0.90657
F1P099	Uncharacterized protein (Fragment) OS=Gallus gallus GN=ARSB PE=4 SV=2 - [F1P099_CHICK]	129.69	0.0909	1	5	5	7	528	59.9	7.71	-0.014503	0.776769
Q5ZIX2	Uncharacterized protein OS=Gallus gallus GN=RCJMB04_23a9 PE=2 SV=1 - [Q5ZIX2_CHICK]	749.6	0.5202	1	1	13	168	346	36.7	8.68	0.142834	0.0528921
F1N9U8	Uncharacterized protein OS=Gallus gallus GN=ETFA PE=4 SV=2 - [F1N9U8_CHICK]	726.27	0.5101	1	1	13	161	345	36.6	8.5	0.0117078	0.824234
Q90574	Filamin OS=Gallus gallus PE=2 SV=1 - [Q90574_CHICK]	1671.08	0.2614	3	1	48	119	2567	275.7	5.92	-0.0833171	0.546114
E1C9J2	Uncharacterized protein (Fragment) OS=Gallus gallus PE=4 SV=2 - [E1C9J2_CHICK]	276.75	0.4192	1	8	8	30	167	18.8	8.44	0.173197	0.382275
E1C0J4	Uncharacterized protein (Fragment) OS=Gallus gallus GN=UPF1 PE=4 SV=2 - [E1C0J4_CHICK]	138.5	0.061	1	5	5	7	1115	123.1	7.25	-0.049816	0.242721
F1N9J3	Uncharacterized protein OS=Gallus gallus GN=GBP7 PE=4 SV=2 - [F1N9J3_CHICK]	297.41	0.1549	1	9	9	16	697	79.3	6	-0.1842	0.0753603
E1C4V1	ATP synthase-coupling factor 6, mitochondrial OS=Gallus gallus GN=ATP5J PE=3 SV=2 - [E1C4V1_CHICK]	155.28	0.3394	1	5	5	35	109	12.5	9.33	0.209484	0.37276
Q8JIG5	Alpha-1-acid glycoprotein OS=Gallus gallus GN=ogchi PE=2 SV=1 - [Q8JIG5_CHICK]	194.16	0.3547	2	5	5	35	203	22.3	5.25	-0.176659	0.459507
Q5F3W4	Uncharacterized protein OS=Gallus gallus GN=SCPEP1 PE=2 SV=1 - [Q5F3W4_CHICK]	176.53	0.1839	1	6	6	20	446	49.9	5.97	0.0511127	0.280179
E1C3K3	Uncharacterized protein (Fragment) OS=Gallus gallus GN=TCEB3 PE=3 SV=2 - [E1C3K3_CHICK]	214.8	0.4167	3	7	7	30	168	18.9	9.77	0.0213408	0.76699
F1P5H6	Uncharacterized protein OS=Gallus gallus GN=LYG2 PE=4 SV=1 - [F1P5H6_CHICK]	97.98	0.1801	2	3	3	9	211	23.3	9.5	0.129349	0.123911
Q5ZMJ6	Uncharacterized protein OS=Gallus gallus GN=SLC25A4 PE=2 SV=1 - [Q5ZMJ6_CHICK]	427.65	0.3221	1	1	8	110	298	32.9	9.73	0.13139	0.349122
F1NKE8	Uncharacterized protein (Fragment) OS=Gallus gallus GN=PDXK PE=4 SV=2 - [F1NKE8_CHICK]	423.3	0.4037	1	10	10	54	322	35.6	6.54	0.104261	0.101853
E1C645	Uncharacterized protein (Fragment) OS=Gallus gallus GN=NDUFA7 PE=4 SV=2 - [E1C645_CHICK]	206.12	0.479	1	5	5	14	119	12.9	10.36	0.0722237	0.481318
Q8UWG7	60S ribosomal protein L6 OS=Gallus gallus GN=RPL6 PE=2 SV=1 - [Q8UWG7_CHICK]	189.86	0.2013	1	5	5	13	298	33.9	10.67	-0.0666628	0.616122
E1C1L6	Ectonucleoside triphosphate diphosphohydrolase 5 OS=Gallus gallus GN=ENTPD5 PE=3 SV=1 - [ENTP5_CHICK]	268.32	0.3178	1	9	9	15	428	47.9	5.62	0.00916428	0.911094
F1P304	Uncharacterized protein (Fragment) OS=Gallus gallus GN=ATP5O PE=3 SV=2 - [F1P304_CHICK]	388.06	0.5244	1	11	11	85	225	24.5	9.82	0.256152	0.108295
E1C6C1	Uncharacterized protein OS=Gallus gallus GN=PEBP1 PE=4 SV=1 - [E1C6C1_CHICK]	447.97	0.8503	1	12	12	103	187	20.9	7.44	0.254977	0.124664
F1P3F2	Solute carrier family 2, facilitated glucose transporter member 2 OS=Gallus gallus GN=SLC2A2 PE=3 SV=1 - [F1P3F2_CHICK]	130.93	0.1107	3	6	6	17	533	57.6	8.59	-0.0432974	0.774477
F1NI85	Uncharacterized protein (Fragment) OS=Gallus gallus GN=COMTD1 PE=4 SV=1 - [F1NI85_CHICK]	686.56	0.7041	1	15	16	148	267	29.5	8.88	0.135355	0.053924
F1P1V5	Uncharacterized protein OS=Gallus gallus GN=ECHDC3 PE=4 SV=2 - [F1P1V5_CHICK]	275.28	0.4276	1	8	8	21	290	31.2	8.37	0.104234	0.280762
F1NBS9	Uncharacterized protein OS=Gallus gallus GN=VAT1 PE=4 SV=2 - [F1NBS9_CHICK]	303.08	0.2513	1	7	7	19	382	41.7	6.62	-0.00463139	0.961366
F1NP63	Uncharacterized protein OS=Gallus gallus GN=KPNB1 PE=4 SV=2 - [F1NP63_CHICK]	442.92	0.2546	1	11	11	33	754	83.9	4.73	-0.0637901	0.420425
Q5F494	Putative uncharacterized protein OS=Gallus gallus GN=RCJMB04_1p14 PE=2 SV=1 - [Q5F494_CHICK]	42.76	0.022	2	1	1	1	953	106.2	8.41	0.0431797	0.568725
F1NNE7	Uncharacterized protein OS=Gallus gallus GN=LNPEP PE=4 SV=2 - [F1NNE7_CHICK]	69.43	0.041	1	4	4	4	1024	116.9	5.45	0.00182983	0.985788
E1BTD5	Uncharacterized protein (Fragment) OS=Gallus gallus GN=STT3B PE=2 SV=2 - [E1BTD5_CHICK]	50.47	0.0388	2	2	3	3	721	82.8	8.81	-0.0342139	0.845894
E1C3Y5	Protein transport protein Sec23A OS=Gallus gallus GN=SEC23A PE=4 SV=1 - [E1C3Y5_CHICK]	550.31	0.2431	1	10	13	44	765	86.1	6.96	0.0561884	0.438269
Q6EML5	Aldolase B (Fragment) OS=Gallus gallus PE=4 SV=1 - [Q6EML5_CHICK]	48.21	0.5882	1	1	2	4	17	1.8	8.22	0.113854	0.499658
F1NR36	Uncharacterized protein (Fragment) OS=Gallus gallus GN=PGPEP1 PE=4 SV=2 - [F1NR36_CHICK]	67.64	0.125	1	2	2	4	208	22.7	5.69	0.0704445	0.239497
Q5ZHQ3	Uncharacterized protein OS=Gallus gallus GN=FLOT2 PE=2 SV=1 - [Q5ZHQ3_CHICK]	35.16	0.0909	1	2	2	2	330	36.2	5.08	-0.0693051	0.38167
F1NT40	Uncharacterized protein OS=Gallus gallus GN=SAR1A PE=3 SV=1 - [F1NT40_CHICK]	86.44	0.2121	1	1	3	9	198	22.4	6.68	-0.0882777	0.728463
E1BXY5	Uncharacterized protein OS=Gallus gallus GN=Gga.16546 PE=4 SV=2 - [E1BXY5_CHICK]	181.43	0.0426	1	7	7	7	2018	224.1	4.73	-0.142783	0.00668136
R4GJG7	Uncharacterized protein OS=Gallus gallus GN=MCM3AP PE=4 SV=1 - [R4GJG7_CHICK]	31.77	0.0083	1	1	1	1	1205	133.4	7.97	-0.0694676	0.454642
R4GIQ2	Uncharacterized protein OS=Gallus gallus GN=RPL21 PE=4 SV=1 - [R4GIQ2_CHICK]	130.22	0.2625	1	4	4	13	160	18.6	10.49	-0.190971	0.708241
E1BVJ9	Uncharacterized protein OS=Gallus gallus GN=RBM47 PE=4 SV=1 - [E1BVJ9_CHICK]	90.28	0.0603	1	3	3	5	597	64.7	7.91	-0.123761	0.235928
E1BT00	Uncharacterized protein OS=Gallus gallus GN=ATP6V1D PE=4 SV=1 - [E1BT00_CHICK]	37.65	0.0486	1	1	1	1	247	28.2	9.52	#NUM!	#NUM!
E1BQH2	Uncharacterized protein OS=Gallus gallus PE=3 SV=2 - [E1BQH2_CHICK]	406.19	0.1693	1	15	15	20	1134	129.9	6.7	0.152843	0.0737456
F1NED9	Uncharacterized protein (Fragment) OS=Gallus gallus GN=LOC770787 PE=4 SV=2 - [F1NED9_CHICK]	23.08	0.0369	1	1	1	1	298	34	8.32	0.0434421	0.750801
Q2PBA1	RNase L inhibitor OS=Gallus gallus GN=RLI PE=2 SV=1 - [Q2PBA1_CHICK]	241.7	0.2604	3	10	10	17	599	67.4	8.34	-0.0776654	0.257478
E1C3A1	Uncharacterized protein OS=Gallus gallus GN=KIF5B PE=3 SV=1 - [E1C3A1_CHICK]	308.19	0.1915	2	14	14	16	966	110.1	6.44	0.032306	0.605352
R4GLI9	Uncharacterized protein OS=Gallus gallus GN=NQO2 PE=4 SV=1 - [R4GLI9_CHICK]	26.56	0.0391	1	1	1	1	230	26.8	6.34	0.0852557	0.483999
H9KZ23	Uncharacterized protein OS=Gallus gallus GN=Gga.37837 PE=4 SV=2 - [H9KZ23_CHICK]	82.35	0.2595	3	2	3	11	131	13.4	8.51	-0.0683649	0.784222
Q5ZHL7	Uncharacterized protein OS=Gallus gallus GN=AIFM1 PE=2 SV=1 - [Q5ZHL7_CHICK]	363.75	0.269	2	10	10	34	591	64.5	9.01	0.00075267	0.98465
F1NEQ6	Proteasome subunit alpha type (Fragment) OS=Gallus gallus GN=PSMA6 PE=3 SV=1 - [F1NEQ6_CHICK]	180.09	0.2932	1	6	6	17	249	27.7	6.55	-0.0740795	0.344215
E1BYF3	Uncharacterized protein OS=Gallus gallus GN=AGPAT3 PE=2 SV=1 - [E1BYF3_CHICK]	25.9	0.0266	1	1	1	1	376	43.6	8.51	-0.268148	0.35183
Q5ZLY3	Uncharacterized protein OS=Gallus gallus GN=TMOD3 PE=2 SV=1 - [Q5ZLY3_CHICK]	151.97	0.1477	1	5	5	8	352	39.3	5.21	0.127406	0.291315
Q5ZJ21	Uncharacterized protein OS=Gallus gallus GN=CTNND1 PE=2 SV=1 - [Q5ZJ21_CHICK]	413.16	0.258	1	11	11	29	597	66.6	6.74	-0.0284983	0.552272
E1C2E9	Uncharacterized protein (Fragment) OS=Gallus gallus GN=MRPS23 PE=4 SV=2 - [E1C2E9_CHICK]	77.38	0.125	1	2	2	4	192	22.3	7.2	0.0671429	0.211362
F1NZ93	Uncharacterized protein OS=Gallus gallus GN=ADHFE1 PE=4 SV=2 - [F1NZ93_CHICK]	496.68	0.5256	1	15	15	41	449	48.6	7.24	0.0158217	0.911706
Q5ZHU4	Uncharacterized protein OS=Gallus gallus GN=PFKP PE=2 SV=1 - [Q5ZHU4_CHICK]	127.01	0.069	1	2	3	5	565	61.2	6.67	0.212742	0.340003
Q98TD1	PIT 54 OS=Gallus gallus GN=PIT 54 PE=2 SV=1 - [Q98TD1_CHICK]	530.21	0.4447	2	12	12	77	470	50.8	4.73	-0.260301	0.0874076
F2Z4L5	60S ribosomal protein L7a (Fragment) OS=Gallus gallus GN=RPL7A PE=2 SV=1 - [F2Z4L5_CHICK]	370.54	0.4038	3	12	12	23	265	29.8	10.51	-0.0095886	0.933202
F1NPJ4	Succinate dehydrogenase [ubiquinone] flavoprotein subunit, mitochondrial OS=Gallus gallus GN=SDHA PE=4 SV=2 - [F1NPJ4_CHICK]	612.23	0.4466	1	1	18	69	665	72.9	7.18	-0.0295136	0.697736
H9L0M5	Uncharacterized protein OS=Gallus gallus PE=4 SV=2 - [H9L0M5_CHICK]	43.57	0.0554	1	2	2	3	397	45.5	8.47	-0.274606	0.0765838
Q92063	Protein-tyrosine kinase OS=Gallus gallus GN=FRNK PE=2 SV=1 - [Q92063_CHICK]	19.63	0.0279	3	1	1	1	359	39.8	6.25	-0.0306471	0.805753
E1BUZ5	Uncharacterized protein (Fragment) OS=Gallus gallus GN=RPLP2 PE=3 SV=2 - [E1BUZ5_CHICK]	284.36	0.6045	1	6	6	64	134	14.2	4.73	0.0897533	0.31916
F1P2A1	Uncharacterized protein OS=Gallus gallus GN=ATOX1 PE=4 SV=2 - [F1P2A1_CHICK]	55.89	0.3099	1	2	2	4	71	8	6.77	0.0120607	0.926718
F1NW88	Uncharacterized protein OS=Gallus gallus PE=4 SV=2 - [F1NW88_CHICK]	80.05	0.018	1	3	3	3	2550	277.1	6.67	0.00048009	0.996838
R4GJ50	Uncharacterized protein (Fragment) OS=Gallus gallus GN=TIMM50 PE=4 SV=1 - [R4GJ50_CHICK]	188.4	0.2017	1	4	4	8	238	27.1	6.92	-0.142855	0.0194885
F1NBA0	Syntaxin-binding protein 1 (Fragment) OS=Gallus gallus GN=STXBP1 PE=4 SV=2 - [F1NBA0_CHICK]	63.71	0.0508	2	2	2	2	591	67.4	6.6	0.00542409	0.86699
F1NHI3	Uncharacterized protein OS=Gallus gallus GN=DHX15 PE=4 SV=2 - [F1NHI3_CHICK]	266.23	0.1535	2	9	9	15	762	87.6	7.33	-0.0256341	0.65607
Q9W6V0	Hyperion protein, 419 kD isoform OS=Gallus gallus GN=hyperion PE=1 SV=1 - [Q9W6V0_CHICK]	11.39	0.0022	2	1	1	1	3616	418.7	5.06	0.0179118	0.743783
F1NV09	Epithelial cell adhesion molecule OS=Gallus gallus GN=EPCAM PE=4 SV=1 - [F1NV09_CHICK]	107.73	0.1569	2	4	4	9	306	34.3	7.44	-0.0703983	0.260293
F1NPS0	Uncharacterized protein (Fragment) OS=Gallus gallus GN=NUP155 PE=4 SV=2 - [F1NPS0_CHICK]	33.58	0.0072	1	1	1	1	1395	154.7	6.23	0.114739	0.374018
F1NN16	Uncharacterized protein (Fragment) OS=Gallus gallus GN=RPS7 PE=4 SV=2 - [F1NN16_CHICK]	372.88	0.5357	1	9	9	60	196	22.3	10.13	-0.119469	0.757572
F1NW87	Uncharacterized protein OS=Gallus gallus GN=SNX1 PE=4 SV=2 - [F1NW87_CHICK]	199.57	0.1304	1	5	7	15	514	58.1	5.41	-0.0105614	0.909347
Q5ZL80	Uncharacterized protein OS=Gallus gallus GN=HNRNPM PE=2 SV=1 - [Q5ZL80_CHICK]	247.81	0.1382	1	9	9	17	709	76	8.73	0.0275008	0.753503
F1P298	Uncharacterized protein OS=Gallus gallus GN=AMDHD1 PE=4 SV=2 - [F1P298_CHICK]	401.53	0.3402	1	11	11	36	435	47.6	6.77	0.0335824	0.422636
E1C7C1	Uncharacterized protein OS=Gallus gallus GN=C8B PE=4 SV=2 - [E1C7C1_CHICK]	44.68	0.0377	1	2	2	2	584	65.3	7.97	-0.1057	0.522616
E1C544	Uncharacterized protein OS=Gallus gallus GN=LOC100857394 PE=4 SV=2 - [E1C544_CHICK]	638.72	0.1807	3	19	19	46	1483	164.8	6.44	-0.0519666	0.651255
F1NI43	Long-chain-fatty-acid--CoA ligase ACSBG2 OS=Gallus gallus GN=ACSBG2 PE=4 SV=2 - [F1NI43_CHICK]	598.74	0.2996	2	2	19	45	761	83.9	7.12	-0.161409	0.497616
Q5F348	Uncharacterized protein OS=Gallus gallus GN=RCJMB04_34k10 PE=2 SV=1 - [Q5F348_CHICK]	76.4	0.0852	1	2	2	4	305	33.9	8.51	-0.261501	0.553841
E1BR10	Uncharacterized protein OS=Gallus gallus GN=PRDX3 PE=4 SV=1 - [E1BR10_CHICK]	359.87	0.4358	1	9	9	80	257	28	8.54	-0.140845	0.0923959
F1NIB4	Uncharacterized protein OS=Gallus gallus GN=HNRNPAB PE=4 SV=2 - [F1NIB4_CHICK]	331.56	0.3607	3	8	8	41	219	24.6	9.64	0.057717	0.556989
E1C0T6	Uncharacterized protein OS=Gallus gallus GN=PLEKHC1 PE=4 SV=2 - [E1C0T6_CHICK]	288.41	0.1795	1	10	10	21	702	79.8	6.51	0.00032843	0.995936
F1P0P3	Uncharacterized protein OS=Gallus gallus PE=4 SV=2 - [F1P0P3_CHICK]	150.66	0.1616	1	4	4	8	359	39.4	7.97	-0.0370558	0.558288
F1NS91	Uncharacterized protein OS=Gallus gallus GN=RPL9 PE=4 SV=2 - [F1NS91_CHICK]	226.88	0.3073	1	6	6	24	192	21.8	10.08	-0.148033	0.546359
F1N8I3	Uncharacterized protein (Fragment) OS=Gallus gallus GN=LOC100859747 PE=4 SV=2 - [F1N8I3_CHICK]	71.28	0.114	1	1	2	6	272	31.8	6.13	-0.0690665	0.477504
Q5ZMV6	Uncharacterized protein OS=Gallus gallus GN=DTYMK PE=2 SV=1 - [Q5ZMV6_CHICK]	30.58	0.0647	1	1	1	1	170	16.9	10.23	-0.0757184	0.233189
P40618	High mobility group protein B3 OS=Gallus gallus GN=HMGB3 PE=2 SV=3 - [HMGB3_CHICK]	180.47	0.302	1	5	5	22	202	23	8.12	-0.173592	0.18454
F1N8A7	Uncharacterized protein OS=Gallus gallus GN=RBKS PE=4 SV=2 - [F1N8A7_CHICK]	91.74	0.1199	1	3	3	6	292	30.9	5.25	0.344324	0.0182238
Q5ZLZ6	Uncharacterized protein OS=Gallus gallus GN=SLC16A1 PE=2 SV=1 - [Q5ZLZ6_CHICK]	187.48	0.1776	1	7	7	16	501	54.3	8.31	-0.00402044	0.935298
F1NLP7	Antithrombin-III OS=Gallus gallus GN=SERPINC1 PE=3 SV=2 - [F1NLP7_CHICK]	361.6	0.3179	2	13	13	24	453	51.7	6	-0.109399	0.0817801
F1NUT5	Adenosylhomocysteinase OS=Gallus gallus GN=AHCYL1 PE=3 SV=2 - [F1NUT5_CHICK]	142.66	0.0787	3	2	4	16	483	53.7	7.44	-0.106535	0.368744
F1NM78	Uncharacterized protein OS=Gallus gallus GN=KMO PE=3 SV=2 - [F1NM78_CHICK]	297.89	0.3004	1	9	9	16	476	54.7	8.44	-0.0356487	0.721798
F1NJ69	Uncharacterized protein OS=Gallus gallus GN=USO1 PE=4 SV=2 - [F1NJ69_CHICK]	249.49	0.0924	2	8	8	14	952	106.1	4.98	0.0601599	0.383306
R4GHB3	Uncharacterized protein OS=Gallus gallus GN=SDSL PE=4 SV=1 - [R4GHB3_CHICK]	240.37	0.2218	2	4	4	15	284	29.7	6.92	0.0193879	0.732967
Q5F397	Uncharacterized protein OS=Gallus gallus GN=PPM1B PE=2 SV=1 - [Q5F397_CHICK]	70.58	0.0646	1	2	2	3	387	42.7	5.11	-0.00723392	0.685164
E1BYG4	Uncharacterized protein OS=Gallus gallus GN=CBS PE=4 SV=2 - [E1BYG4_CHICK]	447.17	0.3526	1	13	13	35	570	63.1	8.05	0.114346	0.0542946
E1C582	Uncharacterized protein OS=Gallus gallus GN=Gga.48579 PE=4 SV=2 - [E1C582_CHICK]	23.39	0.0045	1	1	1	2	1548	174.6	10.05	0.0807388	0.465871
Q5ZIM9	Uncharacterized protein OS=Gallus gallus GN=RCJMB04_24n6 PE=2 SV=1 - [Q5ZIM9_CHICK]	158.13	0.1195	2	5	5	6	519	59.3	6.96	0.0938388	0.284411
E1C444	Uncharacterized protein OS=Gallus gallus GN=COPS8 PE=4 SV=2 - [E1C444_CHICK]	71.27	0.2174	2	3	3	4	207	23	5.38	0.385648	0.0594255
F1NQB6	Unconventional myosin-Va OS=Gallus gallus GN=MYO5A PE=4 SV=2 - [F1NQB6_CHICK]	38.66	0.0104	2	2	2	2	1829	212.3	8.47	0.0326206	0.610679
E1C6R4	Uncharacterized protein OS=Gallus gallus GN=Gga.10907 PE=4 SV=2 - [E1C6R4_CHICK]	187.98	0.2078	1	5	5	7	409	44.3	4.89	-0.0508239	0.585167
E1BTG1	Uncharacterized protein OS=Gallus gallus GN=RPL12 PE=3 SV=2 - [E1BTG1_CHICK]	295.66	0.503	1	6	6	46	165	17.7	9.42	0.10456	0.157922
Q5W4T6	RAD50 protein (Fragment) OS=Gallus gallus GN=RAD50 PE=4 SV=1 - [Q5W4T6_CHICK]	24.14	0.0088	2	1	1	1	1250	145.6	7.14	-0.0538799	0.790959
F1P3F5	Uncharacterized protein OS=Gallus gallus GN=NUMB PE=4 SV=2 - [F1P3F5_CHICK]	76.95	0.0395	4	3	3	4	582	63.2	8.29	0.0215376	0.770381
E1BYQ6	Uncharacterized protein OS=Gallus gallus GN=TPR PE=4 SV=2 - [E1BYQ6_CHICK]	170.28	0.0267	1	5	5	5	2136	243.4	5.22	-0.0289805	0.643043
E1C6V2	Uncharacterized protein OS=Gallus gallus GN=MGLL PE=4 SV=2 - [E1C6V2_CHICK]	284.86	0.3441	1	7	7	43	311	34.2	7.11	-0.0109386	0.885363
F1NIN2	Uncharacterized protein OS=Gallus gallus GN=CTSA PE=4 SV=1 - [F1NIN2_CHICK]	258.01	0.1868	2	7	7	18	471	53.1	6.52	0.183506	0.088776
F1N9G6	Uncharacterized protein OS=Gallus gallus GN=GSTK1 PE=4 SV=2 - [F1N9G6_CHICK]	288.26	0.5223	2	10	10	44	224	25.3	8.85	0.224592	0.158997
E1BVH4	Uncharacterized protein (Fragment) OS=Gallus gallus GN=SEPT7 PE=3 SV=2 - [E1BVH4_CHICK]	213.22	0.1687	3	5	7	11	415	48.4	8.63	0.0798938	0.199635
F1NYG4	Uncharacterized protein OS=Gallus gallus GN=APOH PE=4 SV=2 - [F1NYG4_CHICK]	226.78	0.2995	1	8	8	28	374	41.1	8.22	-0.155714	0.225038
E1C4J9	Uncharacterized protein OS=Gallus gallus GN=SH3PXD2B PE=4 SV=2 - [E1C4J9_CHICK]	50.01	0.0718	1	3	3	3	864	96.4	8.57	0.0499299	0.676811
E1BY22	Uncharacterized protein OS=Gallus gallus GN=MUT PE=4 SV=1 - [E1BY22_CHICK]	507.37	0.2687	1	13	13	30	748	82.7	6.77	0.00315368	0.963799
F1N8J7	Uncharacterized protein OS=Gallus gallus GN=CRIP2 PE=4 SV=2 - [F1N8J7_CHICK]	21.62	0.0909	1	1	1	4	77	8.6	8.76	-0.260301	0.261578
F1N872	Uncharacterized protein (Fragment) OS=Gallus gallus GN=Gga.30681 PE=4 SV=2 - [F1N872_CHICK]	166.19	0.2064	1	5	5	5	281	31.1	6	-0.204148	0.0392071
F1NXZ7	Uncharacterized protein OS=Gallus gallus GN=FAHD1 PE=4 SV=2 - [F1NXZ7_CHICK]	136.27	0.2287	1	5	5	8	223	24.7	7.08	-0.0734812	0.383494
F1NGT4	Uncharacterized protein OS=Gallus gallus GN=Gga.17642 PE=4 SV=2 - [F1NGT4_CHICK]	141.14	0.0125	1	5	5	5	5205	588.9	6.33	-0.229307	0.289901
E1C6C9	Uncharacterized protein OS=Gallus gallus GN=NDUFB10 PE=4 SV=1 - [E1C6C9_CHICK]	173.33	0.36	1	6	6	15	175	20.5	6.34	0.019549	0.79691
F1NSA8	Uncharacterized protein (Fragment) OS=Gallus gallus GN=RAP1A PE=1 SV=1 - [F1NSA8_CHICK]	331.69	0.5479	1	3	7	40	188	21.4	7.59	0.00207385	0.972464
F1NMJ2	Uncharacterized protein OS=Gallus gallus GN=AK4 PE=3 SV=2 - [F1NMJ2_CHICK]	208.61	0.3767	1	8	8	27	223	25.1	8.43	0.0622895	0.32879
E1C7M7	Uncharacterized protein OS=Gallus gallus GN=CTNNA1 PE=4 SV=2 - [E1C7M7_CHICK]	399.44	0.3268	3	10	12	24	514	56.7	7.02	-0.00485708	0.911733
Q9YH06	High mobility group protein B1 OS=Gallus gallus GN=HMGB1 PE=1 SV=1 - [HMGB1_CHICK]	188.21	0.3488	1	6	6	28	215	24.9	5.74	-0.212282	0.152496
E1BXF4	Uncharacterized protein OS=Gallus gallus GN=RCN1 PE=4 SV=2 - [E1BXF4_CHICK]	123.38	0.1368	1	4	4	8	468	51.9	5.48	0.0786085	0.454613
Q6KDZ1	Basement membrane-specific heparan sulfate proteoglycan core protein OS=Gallus gallus GN=HSPG PE=2 SV=1 - [Q6KDZ1_CHICK]	944.55	0.1066	1	29	29	48	4071	432.6	6.25	-0.013726	0.889784
F1NCE5	Uncharacterized protein OS=Gallus gallus GN=LOC100859013 PE=4 SV=2 - [F1NCE5_CHICK]	123.4	0.2888	1	5	5	10	232	25.1	9.03	-0.115399	0.661588
F1NQF6	Uncharacterized protein OS=Gallus gallus GN=MAN2B2 PE=4 SV=2 - [F1NQF6_CHICK]	54	0.0723	1	3	3	4	415	47.3	8.88	0.355858	0.0212115
F1NT44	Translin OS=Gallus gallus GN=TSN PE=4 SV=1 - [F1NT44_CHICK]	50.77	0.1528	2	1	2	2	229	26	6.71	-0.0888412	0.488694
F1NT19	Superoxide dismutase OS=Gallus gallus GN=SOD2 PE=3 SV=1 - [F1NT19_CHICK]	401.84	0.558	3	10	10	128	224	24.8	8.41	0.194745	0.344509
R4GFJ7	Uncharacterized protein OS=Gallus gallus GN=HDHD1 PE=4 SV=1 - [R4GFJ7_CHICK]	142.26	0.3021	1	5	5	6	235	26.3	6.52	0.0040478	0.94009
E1BW78	Uncharacterized protein OS=Gallus gallus GN=COX6C PE=4 SV=2 - [E1BW78_CHICK]	107.25	0.3896	1	3	3	12	77	8.8	10.07	0.0391418	0.781811
E1C1Y0	Uncharacterized protein OS=Gallus gallus GN=RTCD1 PE=4 SV=2 - [E1C1Y0_CHICK]	135.5	0.1308	1	4	4	7	367	39.5	7.9	-0.0479982	0.672216
Q5ZMB9	Uncharacterized protein OS=Gallus gallus GN=LYN PE=2 SV=1 - [Q5ZMB9_CHICK]	164.01	0.1057	3	3	5	7	492	56.2	6.86	-0.0729018	0.34356
F1NQU9	Tyrosine-protein kinase Fyn OS=Gallus gallus GN=FYN PE=4 SV=2 - [F1NQU9_CHICK]	58.61	0.0487	4	1	3	4	534	60.1	6.11	-0.0801787	0.480856
Q5ZHR4	Uncharacterized protein OS=Gallus gallus GN=GARS PE=2 SV=1 - [Q5ZHR4_CHICK]	292.55	0.1912	1	9	9	20	685	77.5	6.51	0.041893	0.327979
F1NWA8	Uncharacterized protein OS=Gallus gallus GN=DNPEP PE=3 SV=2 - [F1NWA8_CHICK]	171.48	0.1438	2	5	5	8	473	51.9	6.87	0.0429455	0.696366
R4GJC6	Aminomethyltransferase (Fragment) OS=Gallus gallus GN=AMT PE=3 SV=1 - [R4GJC6_CHICK]	355.83	0.5979	1	1	9	32	291	30.7	6.99	-0.116913	0.480401
F1NF07	Uncharacterized protein OS=Gallus gallus GN=MAL2 PE=4 SV=1 - [F1NF07_CHICK]	35.31	0.0618	2	1	1	4	178	19.9	8.5	-0.033422	0.794441
Q6EI13	GammaA-like protocadherin OS=Gallus gallus PE=2 SV=1 - [Q6EI13_CHICK]	30.19	0.0148	1	1	1	2	811	86.8	5.25	-0.04679	0.758021
B7U494	Tapasin (Fragment) OS=Gallus gallus PE=4 SV=1 - [B7U494_CHICK]	66.14	0.1098	16	3	3	3	328	34.7	9.11	-0.213573	0.286612
E1C6S5	Uncharacterized protein OS=Gallus gallus GN=ABCC2 PE=3 SV=2 - [E1C6S5_CHICK]	138.28	0.051	1	6	6	8	1550	173.5	8.06	0.0954854	0.292906
R4GGJ8	Uncharacterized protein OS=Gallus gallus GN=LOC100859181 PE=4 SV=1 - [R4GGJ8_CHICK]	55.06	0.0796	3	2	2	4	377	42.9	8.07	0.179224	0.32768
F1NCD8	Uncharacterized protein OS=Gallus gallus GN=TIMD4 PE=4 SV=1 - [F1NCD8_CHICK]	27.2	0.0279	2	1	1	1	359	39.6	5.21	-0.115441	0.592236
F1NFW2	Hydroxypyruvate isomerase (Fragment) OS=Gallus gallus PE=3 SV=2 - [F1NFW2_CHICK]	127.31	0.1791	1	3	3	7	268	29.4	7.44	0.0520599	0.591631
R4GIM2	Uncharacterized protein (Fragment) OS=Gallus gallus GN=LOC100858533 PE=4 SV=1 - [R4GIM2_CHICK]	52.31	0.1271	2	2	2	4	118	13.4	11.49	-0.122844	0.588803
E1C279	Uncharacterized protein OS=Gallus gallus GN=NSDHL PE=3 SV=1 - [E1C279_CHICK]	214.83	0.2283	1	6	6	15	346	38.9	8.35	0.0106248	0.845841
E1BQL8	Uncharacterized protein OS=Gallus gallus GN=LOC100858951 PE=4 SV=1 - [E1BQL8_CHICK]	103.78	0.1478	1	3	3	4	291	32.7	6.42	0.184153	0.0867058
R4GLH7	Uncharacterized protein OS=Gallus gallus GN=LOC100858352 PE=4 SV=1 - [R4GLH7_CHICK]	155.2	0.1829	1	4	4	24	164	17.2	7.37	-0.0298445	0.706116
F1NP60	Uncharacterized protein OS=Gallus gallus GN=MRC2 PE=4 SV=2 - [F1NP60_CHICK]	49.95	0.0101	1	1	1	1	1389	157.8	5.8	#NUM!	#NUM!
Q5ZJV0	Uncharacterized protein OS=Gallus gallus GN=COPS4 PE=2 SV=1 - [Q5ZJV0_CHICK]	78.07	0.0584	1	2	2	3	411	46.8	5.96	-0.0530166	0.576419
F1NEX5	Beta-hexosaminidase OS=Gallus gallus GN=HEXA PE=3 SV=1 - [F1NEX5_CHICK]	307.02	0.289	2	10	11	18	526	58.9	6.54	0.0548238	0.438284
R4GM01	Uncharacterized protein (Fragment) OS=Gallus gallus GN=LOC770321 PE=4 SV=1 - [R4GM01_CHICK]	272.63	0.3643	1	6	6	17	258	27.5	7.75	0.0901191	0.287417
E1BT44	Uncharacterized protein OS=Gallus gallus GN=GLA PE=4 SV=2 - [E1BT44_CHICK]	193.87	0.154	1	5	5	9	409	45.9	5.58	0.121551	0.265016
F1N9Q6	Uncharacterized protein OS=Gallus gallus GN=MGMT PE=4 SV=2 - [F1N9Q6_CHICK]	24.06	0.0504	1	1	1	1	258	28.1	9.2	#NUM!	#NUM!
F1NL85	Magnesium transporter protein 1 OS=Gallus gallus GN=MAGT1 PE=4 SV=1 - [F1NL85_CHICK]	40.72	0.0305	2	1	1	1	328	36.8	9.63	-0.198138	0.197786
R4GH54	Uncharacterized protein OS=Gallus gallus GN=COX20 PE=4 SV=1 - [R4GH54_CHICK]	88.65	0.265	1	2	2	5	117	13.2	9.01	0.0571258	0.708505
Q98UJ8	Branched-chain alpha-keto acid dehydrogenase E1-alpha subunit (Fragment) OS=Gallus gallus PE=2 SV=1 - [Q98UJ8_CHICK]	132.56	0.1319	1	4	4	13	432	48.8	8.44	0.161719	0.0409774
Q5ZIA3	Uncharacterized protein OS=Gallus gallus GN=SNX3 PE=2 SV=1 - [Q5ZIA3_CHICK]	115.4	0.2469	1	4	4	10	162	18.7	8.66	0.119472	0.24266
E1BQ63	Uncharacterized protein (Fragment) OS=Gallus gallus GN=SLC25A10 PE=3 SV=2 - [E1BQ63_CHICK]	432.63	0.3316	1	11	11	26	395	43.2	9.32	-0.0623824	0.536221
Q5ZMD0	Uncharacterized protein OS=Gallus gallus GN=RCJMB04_2i9 PE=2 SV=1 - [Q5ZMD0_CHICK]	153.66	0.086	2	3	3	4	535	59.8	9.1	-0.0780337	0.50472
F1P2P3	Uncharacterized protein OS=Gallus gallus GN=CARS2 PE=3 SV=2 - [F1P2P3_CHICK]	137.16	0.0797	1	4	4	4	590	65.7	7.69	-0.156259	0.193687
F1NKR1	Uncharacterized protein OS=Gallus gallus GN=MAN2A1 PE=4 SV=2 - [F1NKR1_CHICK]	128.58	0.0538	1	5	5	6	1153	131.9	7.37	-0.0613847	0.279674
F1NE97	Nuclear migration protein nudC OS=Gallus gallus GN=NUDC PE=4 SV=1 - [F1NE97_CHICK]	254.87	0.2434	2	7	7	16	341	39.2	5.4	-0.0237276	0.59774
E1BSU3	Uncharacterized protein OS=Gallus gallus GN=STAG2 PE=4 SV=1 - [E1BSU3_CHICK]	27.05	0.0063	1	1	1	1	1268	145.7	5.49	0.0168712	0.880502
R4GH14	Charged multivesicular body protein 6 (Fragment) OS=Gallus gallus GN=CHMP6 PE=4 SV=1 - [R4GH14_CHICK]	53.74	0.115	2	1	1	2	113	12.7	4.09	-0.00605417	0.971438
Q5ZJY1	Uncharacterized protein OS=Gallus gallus GN=RCJMB04_14h20 PE=2 SV=1 - [Q5ZJY1_CHICK]	383.96	0.708	2	10	10	32	250	26.2	5.82	0.236672	0.093253
F1P284	Uncharacterized protein OS=Gallus gallus GN=LTA4H PE=4 SV=1 - [F1P284_CHICK]	470.42	0.2827	2	13	13	33	612	69.3	6.95	-0.0414103	0.255785
F1N9I5	Uncharacterized protein OS=Gallus gallus GN=ELAVL1 PE=4 SV=1 - [F1N9I5_CHICK]	103.62	0.1074	3	3	3	9	326	36.1	8.94	0.178485	0.00680928
Q5ZIH1	Uncharacterized protein OS=Gallus gallus GN=HNRNPD PE=2 SV=1 - [Q5ZIH1_CHICK]	145.56	0.1984	1	2	4	11	257	29.3	9.31	0.16199	0.000881473
F1NCV7	Uncharacterized protein OS=Gallus gallus GN=MTAP PE=3 SV=2 - [F1NCV7_CHICK]	99.45	0.2143	2	4	4	10	280	30.8	6.61	0.0583834	0.242326
R4GJT7	Uncharacterized protein OS=Gallus gallus PE=4 SV=1 - [R4GJT7_CHICK]	95.23	0.1107	1	4	4	8	551	59.2	5.26	-0.204963	0.173558
E1C0V1	Uncharacterized protein OS=Gallus gallus GN=GNPNAT1 PE=4 SV=1 - [E1C0V1_CHICK]	127.4	0.2842	1	4	4	7	190	21.4	6.54	0.0241996	0.806841
Q5ZKB0	Uncharacterized protein OS=Gallus gallus GN=TMED2 PE=2 SV=1 - [Q5ZKB0_CHICK]	150.57	0.1891	1	3	3	13	201	22.6	5.43	-0.0560906	0.244532
F1NDT9	Uncharacterized protein (Fragment) OS=Gallus gallus GN=ACP2 PE=4 SV=1 - [F1NDT9_CHICK]	58.61	0.0732	2	2	2	2	328	37.5	5.2	0.222317	0.0576542
E1C1B4	Uncharacterized protein OS=Gallus gallus GN=GALK1 PE=3 SV=2 - [E1C1B4_CHICK]	206.19	0.2015	1	4	4	12	392	41.6	6.09	-0.102998	0.401766
R4GGZ2	Uncharacterized protein OS=Gallus gallus GN=NDUFA4 PE=4 SV=1 - [R4GGZ2_CHICK]	167.76	0.4756	1	5	5	21	82	9.5	9.54	0.0116271	0.898341
E1C8F7	Uncharacterized protein (Fragment) OS=Gallus gallus GN=RPL24 PE=4 SV=2 - [E1C8F7_CHICK]	175.96	0.3057	1	5	5	15	157	17.8	11.43	-0.224643	0.687921
E1C123	Uncharacterized protein OS=Gallus gallus GN=AHSA1 PE=4 SV=1 - [E1C123_CHICK]	175.12	0.2147	1	5	5	12	340	38	5.81	0.0229667	0.78643
F1NCC1	Uncharacterized protein (Fragment) OS=Gallus gallus GN=XYLB PE=4 SV=2 - [F1NCC1_CHICK]	210.66	0.1922	1	6	6	14	437	48	6.62	0.132996	0.159126
F1NGG2	Uncharacterized protein OS=Gallus gallus GN=SNX12 PE=4 SV=1 - [F1NGG2_CHICK]	110.65	0.2346	2	4	4	11	162	18.9	8.43	0.0783826	0.543527
F1P0X3	Uncharacterized protein OS=Gallus gallus GN=SEPT11 PE=3 SV=2 - [F1P0X3_CHICK]	80.91	0.0679	4	2	3	9	442	50.6	6.86	-0.0246765	0.783739
R4GIS7	Uncharacterized protein OS=Gallus gallus GN=LOC100857596 PE=4 SV=1 - [R4GIS7_CHICK]	148.12	0.5591	1	6	6	16	127	14.1	8	-0.0408632	0.683592
E1C7F5	Uncharacterized protein OS=Gallus gallus GN=SLC33A1 PE=4 SV=1 - [E1C7F5_CHICK]	44.29	0.0238	1	1	1	1	546	59.8	7.9	#NUM!	#NUM!
E1C296	Uncharacterized protein OS=Gallus gallus GN=LLGL2 PE=4 SV=2 - [E1C296_CHICK]	27.57	0.0145	1	1	1	1	830	93.6	6.74	0.0704513	0.617696
F1NKR8	Major vault protein OS=Gallus gallus GN=MVP PE=4 SV=2 - [F1NKR8_CHICK]	815.14	0.4099	3	20	20	38	849	93.7	5.45	-0.110129	0.146801
Q5ZMK3	Uncharacterized protein OS=Gallus gallus GN=SCCPDH PE=2 SV=1 - [Q5ZMK3_CHICK]	730.99	0.4401	2	16	16	84	434	46.8	9.01	0.0115433	0.918552
Q90WF0	CgABP260 OS=Gallus gallus PE=2 SV=1 - [Q90WF0_CHICK]	150.62	0.0158	2	1	3	11	2658	280.3	6.37	-0.157878	0.537958
E1BRE9	Decorin OS=Gallus gallus GN=DCN PE=4 SV=2 - [E1BRE9_CHICK]	429.81	0.381	2	12	12	31	357	39.6	8.32	-0.227152	0.184077
E1BZE1	Uncharacterized protein OS=Gallus gallus GN=AHSG PE=4 SV=1 - [E1BZE1_CHICK]	92.61	0.0785	1	2	2	5	344	37.2	6.21	0.0249587	0.868113
Q9YGP0	Clusterin OS=Gallus gallus PE=2 SV=1 - [Q9YGP0_CHICK]	52.33	0.058	1	2	2	2	448	51.3	5.67	-0.218337	0.323358
Q6EE30	Eukaryotic translation elongation factor 1 OS=Gallus gallus PE=2 SV=1 - [Q6EE30_CHICK]	273.54	0.25	1	8	8	19	436	49.8	6.55	0.0975225	0.217774
Q90ZG0	Peptidyl-prolyl cis-trans isomerase OS=Gallus gallus GN=FKBP12 PE=4 SV=1 - [Q90ZG0_CHICK]	98.25	0.25	2	2	2	13	108	12	8.16	0.00262858	0.9885
Q5ZLI9	Uncharacterized protein OS=Gallus gallus GN=HIBADH PE=2 SV=1 - [Q5ZLI9_CHICK]	394.85	0.3544	2	8	8	26	333	35.3	8.32	-0.0445198	0.383171
F1P4F4	Uncharacterized protein OS=Gallus gallus GN=SSR1 PE=4 SV=1 - [F1P4F4_CHICK]	148.17	0.125	2	3	3	21	288	32.2	4.51	0.00641059	0.888554
E1C8U4	Uncharacterized protein (Fragment) OS=Gallus gallus GN=EPS8L2 PE=4 SV=2 - [E1C8U4_CHICK]	245.6	0.1418	2	7	7	12	691	79.3	7.59	0.0113892	0.860539
Q5ZMN1	Uncharacterized protein OS=Gallus gallus GN=G3BP1 PE=2 SV=1 - [Q5ZMN1_CHICK]	169.34	0.1525	1	5	5	10	472	52.4	5.21	0.0810528	0.321593
E1BYS5	Uncharacterized protein OS=Gallus gallus GN=CGNL1 PE=4 SV=2 - [E1BYS5_CHICK]	132.09	0.0479	1	5	5	7	1294	149.1	5.36	0.232722	0.0104024
E1C2L5	Uncharacterized protein (Fragment) OS=Gallus gallus GN=THOC4 PE=4 SV=2 - [E1C2L5_CHICK]	182.57	0.2218	1	4	4	6	266	27.9	11.37	-0.0518338	0.647978
F1NUP9	Uncharacterized protein OS=Gallus gallus GN=SDR16C5 PE=3 SV=1 - [F1NUP9_CHICK]	227.03	0.3574	2	7	7	14	305	33.6	8.94	-0.0383266	0.752308
E1BS94	Uncharacterized protein (Fragment) OS=Gallus gallus GN=FUCA2 PE=4 SV=2 - [E1BS94_CHICK]	61.01	0.0488	1	2	2	2	471	53.7	6.74	-0.0714173	0.503431
F1NPK5	Uncharacterized protein OS=Gallus gallus GN=LOC769580 PE=4 SV=2 - [F1NPK5_CHICK]	158.18	0.0919	1	6	6	6	881	96.7	6.92	-0.215723	0.315984
E1BTA0	Uncharacterized protein OS=Gallus gallus GN=COMT PE=4 SV=1 - [E1BTA0_CHICK]	105.3	0.2176	1	4	4	8	262	29.8	6.58	0.0584021	0.105081
E1BYU8	Uncharacterized protein OS=Gallus gallus GN=NUP98 PE=4 SV=2 - [E1BYU8_CHICK]	91.57	0.0139	1	2	2	3	1798	195.3	6.1	0.288036	0.0169042
Q5ZMD9	Uncharacterized protein OS=Gallus gallus GN=RCJMB04_2h4 PE=2 SV=1 - [Q5ZMD9_CHICK]	126.19	0.0983	2	5	5	7	519	59.4	8.76	0.0221059	0.666501
F1NIS9	Uncharacterized protein (Fragment) OS=Gallus gallus PE=4 SV=2 - [F1NIS9_CHICK]	153.25	0.1767	1	3	5	16	317	36.3	7.15	0.103199	0.673405
K4Q293	Histidine-rich glycoprotein OS=Gallus gallus PE=2 SV=1 - [K4Q293_CHICK]	127.29	0.0758	2	4	4	8	739	83.5	7.33	-0.110046	0.636454
F1P1L8	Uncharacterized protein OS=Gallus gallus GN=SERPINB6 PE=3 SV=1 - [F1P1L8_CHICK]	136.82	0.153	2	4	4	7	379	43.1	5.22	-0.100763	0.367851
O42134	Calpain small subunit (Fragment) OS=Gallus gallus PE=2 SV=1 - [O42134_CHICK]	230.43	0.4346	1	6	6	16	214	23.9	5.2	0.0426902	0.672721
F1NMD8	Uncharacterized protein (Fragment) OS=Gallus gallus GN=SGPL1 PE=2 SV=1 - [F1NMD8_CHICK]	152.56	0.1518	2	6	6	8	560	62.3	7.77	-0.00703371	0.881985
F1NDA9	Uncharacterized protein OS=Gallus gallus GN=AP1G1 PE=4 SV=2 - [F1NDA9_CHICK]	116.41	0.0633	2	5	5	6	821	91.3	6.83	-0.0963971	0.126772
F1NZ85	Uncharacterized protein (Fragment) OS=Gallus gallus GN=SEC16A PE=4 SV=1 - [F1NZ85_CHICK]	49.38	0.0098	1	2	2	2	2241	243.9	5.88	0.036573	0.492082
E1BS06	Uncharacterized protein OS=Gallus gallus GN=RPL23A PE=3 SV=2 - [E1BS06_CHICK]	196.4	0.4258	1	7	7	33	155	17.6	10.45	-0.0993276	0.813941
Q92007	Aldolase A (Fragment) OS=Gallus gallus GN=aldolase C PE=2 SV=1 - [Q92007_CHICK]	34.04	0.1905	1	1	1	2	42	4.4	7.34	0.0339527	0.893363
F1NVY5	Uncharacterized protein (Fragment) OS=Gallus gallus GN=DNAJB11 PE=4 SV=1 - [F1NVY5_CHICK]	147.73	0.2115	1	5	5	7	364	40.9	6.32	0.00506829	0.910756
Q5ZK58	Uncharacterized protein OS=Gallus gallus GN=RCJMB04_13a24 PE=2 SV=1 - [Q5ZK58_CHICK]	135.1	0.2	2	6	6	9	395	44.6	8.12	0.0901263	0.313091
E1C8A6	Uncharacterized protein (Fragment) OS=Gallus gallus PE=4 SV=2 - [E1C8A6_CHICK]	38.95	0.0344	1	1	1	2	320	35.8	6.98	-0.227187	0.651323
F1NZC4	Uncharacterized protein OS=Gallus gallus GN=CCDC51 PE=4 SV=2 - [F1NZC4_CHICK]	35.09	0.0288	1	1	1	1	416	46.7	9.11	0.107567	0.659841
F1NB10	Uncharacterized protein OS=Gallus gallus GN=GPS1 PE=2 SV=1 - [F1NB10_CHICK]	26.46	0.0205	2	1	1	1	487	55.2	6.61	-0.0347547	0.764972
E1BZJ9	Uncharacterized protein OS=Gallus gallus GN=SCLY PE=4 SV=1 - [E1BZJ9_CHICK]	212.33	0.182	1	6	6	9	423	45.5	7.15	-0.0137737	0.847769
E1C2I9	Uncharacterized protein OS=Gallus gallus GN=LARS PE=3 SV=1 - [E1C2I9_CHICK]	602.37	0.215	1	17	17	27	1177	134.2	6.93	0.0350575	0.570884
F1NJ23	Laminin subunit beta-1 OS=Gallus gallus GN=LAMB1 PE=4 SV=2 - [F1NJ23_CHICK]	262.18	0.0671	1	8	8	9	1536	168.4	4.89	-0.205233	0.179564
F1NFS3	Putative oxidoreductase GLYR1 (Fragment) OS=Gallus gallus GN=GLYR1 PE=4 SV=2 - [F1NFS3_CHICK]	71.14	0.0543	2	2	2	3	552	60.4	9.25	-0.0408577	0.418212
E1BTV1	Uncharacterized protein (Fragment) OS=Gallus gallus GN=STOM PE=4 SV=2 - [E1BTV1_CHICK]	239.92	0.3979	1	7	7	16	284	31.4	8.84	0.0246555	0.779545
F1N9I7	Probable carboxypeptidase PM20D1 OS=Gallus gallus GN=PM20D1 PE=4 SV=1 - [F1N9I7_CHICK]	163.54	0.1393	2	5	5	5	517	57.1	7.21	0.086972	0.389489
Q5ZLM4	Uncharacterized protein OS=Gallus gallus GN=GLB1 PE=2 SV=1 - [Q5ZLM4_CHICK]	85.62	0.1688	1	4	4	6	385	43.6	5.94	0.263746	0.0162988
F1NH93	Uncharacterized protein (Fragment) OS=Gallus gallus GN=RPS20 PE=3 SV=2 - [F1NH93_CHICK]	167	0.2231	1	3	3	18	121	13.6	9.94	-0.0320003	0.823401
E1BXI0	Uncharacterized protein OS=Gallus gallus GN=BBOX1 PE=4 SV=1 - [E1BXI0_CHICK]	174.89	0.2371	1	7	7	11	388	44.6	6.54	0.0331656	0.470226
F1NQF4	Heme oxygenase 1 OS=Gallus gallus GN=HMOX1 PE=2 SV=2 - [F1NQF4_CHICK]	470.32	0.4662	4	12	12	45	296	33.5	8.43	0.131509	0.0353977
R9PXL3	Uncharacterized protein OS=Gallus gallus GN=LOC100858362 PE=4 SV=1 - [R9PXL3_CHICK]	22.4	0.0415	2	1	1	2	217	24.8	6.79	-0.0349631	0.704314
F1P5J5	Uncharacterized protein OS=Gallus gallus GN=AARS PE=3 SV=2 - [F1P5J5_CHICK]	786.01	0.3034	2	20	20	72	913	101.3	5.92	0.0836256	0.0115919
E1C6X1	Uncharacterized protein OS=Gallus gallus GN=PPA2 PE=4 SV=2 - [E1C6X1_CHICK]	372.51	0.3758	1	10	10	66	306	34.5	5.73	0.081909	0.316958
E1C688	Uncharacterized protein OS=Gallus gallus GN=HPGD PE=2 SV=2 - [E1C688_CHICK]	72.69	0.1245	1	3	3	5	265	28.9	5.91	0.0310083	0.795672
F1NM39	Histone deacetylase OS=Gallus gallus GN=HDAC2 PE=3 SV=1 - [F1NM39_CHICK]	64.16	0.0758	4	1	3	4	488	55.3	5.91	-0.193262	0.0507257
R4GIN3	Uncharacterized protein OS=Gallus gallus GN=LOC777320 PE=4 SV=1 - [R4GIN3_CHICK]	191.47	0.1959	1	5	5	16	342	38.5	6.14	0.0320326	0.576821
E1BXR1	Uncharacterized protein (Fragment) OS=Gallus gallus GN=VBP1 PE=4 SV=2 - [E1BXR1_CHICK]	185.67	0.3268	1	6	6	11	205	23.1	8.19	0.101099	0.243384
R4GJ68	Uncharacterized protein OS=Gallus gallus GN=COX7A2L PE=4 SV=1 - [R4GJ68_CHICK]	116.26	0.4828	1	3	3	10	116	12.6	9.7	-0.0115668	0.841459
E1BYG8	Uncharacterized protein OS=Gallus gallus GN=GSPT1 PE=4 SV=2 - [E1BYG8_CHICK]	186.96	0.1343	1	8	8	12	618	67.6	5.21	-0.0146553	0.696587
R4GJL1	Uncharacterized protein OS=Gallus gallus GN=NIPSNAP3A PE=4 SV=1 - [R4GJL1_CHICK]	274.84	0.34	1	8	8	52	250	28.1	9.42	-0.12045	0.403038
F1NYI5	Uncharacterized protein OS=Gallus gallus GN=LOC100859677 PE=4 SV=2 - [F1NYI5_CHICK]	23.02	0.0085	1	1	1	1	1064	115.1	5.26	-0.148043	0.0271001
F1NLH8	Uncharacterized protein OS=Gallus gallus GN=DNAJA4 PE=3 SV=2 - [F1NLH8_CHICK]	185.43	0.1706	1	5	6	13	428	48	7.17	-0.065547	0.367603
F1P4W1	Uncharacterized protein (Fragment) OS=Gallus gallus GN=DNAJA2 PE=2 SV=1 - [F1P4W1_CHICK]	264.24	0.2935	2	6	7	30	385	42.9	6.61	0.0189776	0.805378
E1C3D2	Septin-2 OS=Gallus gallus GN=SEPT2 PE=3 SV=1 - [E1C3D2_CHICK]	329.87	0.3619	2	4	10	24	362	41.6	6.3	-0.0678709	0.434918
F1P4I7	Uncharacterized protein OS=Gallus gallus GN=VNN1 PE=4 SV=2 - [F1P4I7_CHICK]	150	0.1109	2	1	4	13	496	55.4	6.58	-0.131103	0.67367
E1BUA6	Uncharacterized protein OS=Gallus gallus GN=Gga.39526 PE=4 SV=2 - [E1BUA6_CHICK]	185.6	0.1058	1	1	4	15	520	57.9	5.5	0.138471	0.7228
E1BV44	Uncharacterized protein OS=Gallus gallus GN=CSE1L PE=4 SV=2 - [E1BV44_CHICK]	127.38	0.0577	1	4	4	10	971	110.4	5.62	-0.0413492	0.777993
E1BUS3	Uncharacterized protein OS=Gallus gallus GN=DNAJC13 PE=4 SV=1 - [E1BUS3_CHICK]	115.97	0.0169	1	3	3	4	2244	254.8	6.77	-0.166997	0.258884
R4GL97	Uncharacterized protein OS=Gallus gallus GN=LOC100859183 PE=4 SV=1 - [R4GL97_CHICK]	17.4	0.0338	1	1	1	1	296	33.8	8.18	0.0642862	0.391887
F1NXT5	Uncharacterized protein OS=Gallus gallus GN=BCKDHB PE=4 SV=2 - [F1NXT5_CHICK]	159.11	0.1636	2	4	4	9	379	41.5	7.28	-0.000825123	0.994493
E1BX03	Uncharacterized protein OS=Gallus gallus GN=FUBP1 PE=4 SV=2 - [E1BX03_CHICK]	156.35	0.1058	2	4	5	9	520	55.2	7.88	-0.0279446	0.820033
E1C7G8	Dimethylaniline monooxygenase [N-oxide-forming] OS=Gallus gallus GN=LOC100857724 PE=3 SV=2 - [E1C7G8_CHICK]	228.23	0.1928	2	7	7	17	529	60.4	8.73	-0.025376	0.773969
Q90994	Alternatively spliced tenascin 190, 200 and 230 kd variants OS=Gallus gallus PE=2 SV=1 - [Q90994_CHICK]	172.83	0.0666	5	7	7	8	1532	168.5	5.24	-0.229386	0.137907
E1BYD4	Uncharacterized protein OS=Gallus gallus GN=NDRG1 PE=4 SV=1 - [E1BYD4_CHICK]	182.51	0.1741	1	5	5	22	402	44.2	6.25	0.0519818	0.562121
F1NSW3	Uncharacterized protein OS=Gallus gallus GN=TNPO1 PE=4 SV=2 - [F1NSW3_CHICK]	98.87	0.0397	1	2	2	3	780	88.5	5	0.125288	0.418952
F1NLE4	Uncharacterized protein OS=Gallus gallus GN=GSS PE=4 SV=2 - [F1NLE4_CHICK]	433.9	0.4684	1	15	15	23	474	52.3	5.88	0.00663776	0.83825
R4GG14	Uncharacterized protein OS=Gallus gallus GN=TOR1AIP1 PE=4 SV=1 - [R4GG14_CHICK]	212.83	0.1552	1	5	5	14	406	45	7.59	-0.0698298	0.674706
F1NI94	Uncharacterized protein OS=Gallus gallus GN=ITGA9 PE=3 SV=1 - [F1NI94_CHICK]	55.8	0.0107	2	1	1	1	1031	114.9	6.35	-0.192072	0.212893
F1ND15	Uncharacterized protein (Fragment) OS=Gallus gallus GN=DNAJC8 PE=4 SV=2 - [F1ND15_CHICK]	48.58	0.0751	1	2	2	3	253	29.8	9.23	0.0103223	0.850603
R4GGS3	Uncharacterized protein (Fragment) OS=Gallus gallus GN=LOC100859112 PE=4 SV=1 - [R4GGS3_CHICK]	277.46	0.4938	1	5	5	31	160	17.1	9.73	0.0447855	0.692749
R4GHX9	Uncharacterized protein (Fragment) OS=Gallus gallus PE=4 SV=1 - [R4GHX9_CHICK]	163.95	0.0783	2	1	3	11	549	58.1	5.53	0.223182	0.638204
F1NGM2	Uncharacterized protein OS=Gallus gallus GN=ADCK3 PE=4 SV=2 - [F1NGM2_CHICK]	107.06	0.0787	1	4	4	7	648	72.4	6.81	0.0410243	0.563534
Q5F3I2	Putative uncharacterized protein OS=Gallus gallus GN=RCJMB04_16d21 PE=2 SV=1 - [Q5F3I2_CHICK]	85.72	0.0479	2	3	3	5	794	88.6	6.28	0.127264	0.0457966
E1C8E8	Uncharacterized protein OS=Gallus gallus GN=NMI PE=4 SV=2 - [E1C8E8_CHICK]	35.27	0.0289	1	1	1	1	381	42.9	5.03	-0.0381169	0.727053
E1C8W4	Ubiquitin carboxyl-terminal hydrolase OS=Gallus gallus GN=USP5 PE=3 SV=2 - [E1C8W4_CHICK]	685.01	0.2932	1	17	17	34	856	95.7	5.11	-0.12236	0.268296
E1C4U7	Uncharacterized protein OS=Gallus gallus GN=NDUFB3 PE=4 SV=1 - [E1C4U7_CHICK]	21.44	0.1122	1	1	1	5	98	11.1	9.82	-0.0407849	0.873249
F1P1L0	Uncharacterized protein OS=Gallus gallus GN=SIRT3 PE=4 SV=2 - [F1P1L0_CHICK]	96.42	0.0954	1	3	3	6	346	38.6	8.27	-0.240392	0.0572297
F7BGT1	Uncharacterized protein OS=Gallus gallus GN=NUDT1 PE=3 SV=1 - [F7BGT1_CHICK]	68.64	0.25	1	3	3	3	156	18.1	5.08	0.157219	0.327383
F1NKW0	Uncharacterized protein OS=Gallus gallus GN=ABCB1 PE=3 SV=2 - [F1NKW0_CHICK]	115.59	0.038	3	3	3	6	1288	141.9	7.4	-0.023245	0.887774
F1P4X5	Uncharacterized protein OS=Gallus gallus GN=CCAR1 PE=4 SV=2 - [F1P4X5_CHICK]	81.74	0.0431	1	4	4	4	1138	131.2	5.72	0.081493	0.404576
F1P2G1	Uncharacterized protein OS=Gallus gallus GN=CALR3 PE=3 SV=2 - [F1P2G1_CHICK]	20.08	0.0215	1	1	1	1	419	48	5.39	-0.0668935	0.530584
E1C163	Uncharacterized protein OS=Gallus gallus GN=TBRG4 PE=4 SV=2 - [E1C163_CHICK]	65.15	0.0689	1	3	3	5	639	71.2	8.06	0.0252576	0.778347
F1NMM6	Uncharacterized protein OS=Gallus gallus GN=TCIRG1 PE=2 SV=2 - [F1NMM6_CHICK]	70.88	0.0466	2	3	3	4	837	94.4	6.49	0.0203601	0.846886
F1NL83	Uncharacterized protein OS=Gallus gallus GN=LOC771947 PE=4 SV=2 - [F1NL83_CHICK]	40.38	0.1519	1	1	1	6	79	8.9	10.36	-0.000263931	0.999191
F2Z4K7	40S ribosomal protein S3a OS=Gallus gallus GN=RPS3A PE=2 SV=1 - [F2Z4K7_CHICK]	381.96	0.5152	2	12	12	37	264	29.8	9.72	-0.169323	0.325017
F1NBN1	Uncharacterized protein OS=Gallus gallus GN=SEC61A1 PE=3 SV=2 - [F1NBN1_CHICK]	377.69	0.271	2	8	8	30	476	52.2	8.06	-0.0563383	0.741397
E1BTZ4	Uncharacterized protein OS=Gallus gallus GN=TMEM214 PE=4 SV=2 - [E1BTZ4_CHICK]	68.18	0.0529	1	3	3	3	680	75.7	9.33	0.0194546	0.834582
F1NPM7	Uncharacterized protein OS=Gallus gallus GN=TRA2A PE=4 SV=2 - [F1NPM7_CHICK]	109.25	0.1516	2	3	3	8	277	32.4	11.22	-0.137135	0.536146
Q5ZIW8	Uncharacterized protein OS=Gallus gallus GN=RRAS2 PE=2 SV=1 - [Q5ZIW8_CHICK]	65.59	0.0985	1	2	2	2	203	23.2	6.01	-0.0171532	0.831701
R4GKB8	Uncharacterized protein (Fragment) OS=Gallus gallus GN=LOC771478 PE=4 SV=1 - [R4GKB8_CHICK]	140.65	0.4203	1	3	3	25	69	7.1	4.22	0.10564	0.383914
F1NJ25	Uncharacterized protein OS=Gallus gallus PE=4 SV=2 - [F1NJ25_CHICK]	76.51	0.0941	1	2	2	3	287	30.9	9.82	-0.0715744	0.750092
E1BVB0	Uncharacterized protein OS=Gallus gallus GN=ARL1 PE=3 SV=1 - [E1BVB0_CHICK]	102.46	0.2155	1	3	3	5	181	20.4	5.72	-0.118533	0.263971
F1NGI6	Uncharacterized protein (Fragment) OS=Gallus gallus GN=SGSH PE=4 SV=2 - [F1NGI6_CHICK]	24	0.0239	1	1	1	2	503	56.7	7.65	0.050831	0.442569
E1C5P6	Uncharacterized protein OS=Gallus gallus GN=FBN3 PE=4 SV=2 - [E1C5P6_CHICK]	47.26	0.0103	2	1	2	3	3009	324.4	4.84	-0.120785	0.643704
E1BSC2	Uncharacterized protein OS=Gallus gallus GN=SERF1A PE=4 SV=1 - [E1BSC2_CHICK]	22.5	0.129	1	1	1	2	62	7.2	10.83	-0.261687	0.069133
H9KZC8	Uncharacterized protein OS=Gallus gallus GN=PA2G4 PE=4 SV=2 - [H9KZC8_CHICK]	232.73	0.2971	1	8	8	19	340	38.1	8.05	0.00772315	0.8614
F1NG33	Uncharacterized protein (Fragment) OS=Gallus gallus GN=PTGES2 PE=4 SV=1 - [F1NG33_CHICK]	101.07	0.1409	1	3	3	4	362	40.9	9.57	-0.121375	0.278334
F1NDF3	NADH dehydrogenase [ubiquinone] 1 alpha subcomplex subunit 2 (Fragment) OS=Gallus gallus GN=NDUFA2 PE=3 SV=1 - [F1NDF3_CHICK]	82.06	0.2871	1	3	3	10	101	11.2	9.91	0.0965645	0.318584
E1C944	Uncharacterized protein OS=Gallus gallus GN=PPAP2B PE=4 SV=2 - [E1C944_CHICK]	27.59	0.0351	1	1	1	2	313	35.1	8.76	-0.27931	0.0651044
F1NVW6	Uncharacterized protein (Fragment) OS=Gallus gallus PE=4 SV=2 - [F1NVW6_CHICK]	148.96	0.1853	1	1	3	10	232	25.5	4.92	-0.31888	0.379845
F1NDY5	Kynureninase OS=Gallus gallus GN=KYNU PE=3 SV=2 - [F1NDY5_CHICK]	101.84	0.0792	1	4	4	9	505	56.7	6.8	-0.0937539	0.515091
Q5ZJF7	Uncharacterized protein OS=Gallus gallus GN=ZNF259 PE=2 SV=1 - [Q5ZJF7_CHICK]	23.79	0.0346	1	1	1	2	231	25.8	4.51	-0.0418574	0.0895987
E1BZ56	Uncharacterized protein OS=Gallus gallus GN=PSMG2 PE=4 SV=2 - [E1BZ56_CHICK]	44.25	0.0733	1	2	2	2	273	30.3	6.89	0.00828368	0.774719
F1NWX6	Uncharacterized protein OS=Gallus gallus GN=PLG PE=3 SV=2 - [F1NWX6_CHICK]	260.9	0.1658	2	11	11	20	802	90.7	7.65	-0.0732434	0.557732
F1N8N7	Integrin beta OS=Gallus gallus GN=ITGB1 PE=2 SV=1 - [F1N8N7_CHICK]	267.39	0.1507	2	9	9	22	803	88.6	5.25	-0.0566708	0.534428
F1NNX7	Uncharacterized protein OS=Gallus gallus GN=Gga.54816 PE=4 SV=2 - [F1NNX7_CHICK]	331.52	0.058	3	12	12	22	2898	314.7	6.68	-0.0872261	0.196057
F1N829	Uncharacterized protein OS=Gallus gallus GN=CUL2 PE=3 SV=2 - [F1N829_CHICK]	33.43	0.0161	1	1	1	1	745	87	6.9	0.503104	0.115559
R4GH60	Uncharacterized protein OS=Gallus gallus PE=4 SV=1 - [R4GH60_CHICK]	29.67	0.0438	1	1	1	1	274	30.3	9.48	0.0171211	0.876963
F1NP36	Uncharacterized protein OS=Gallus gallus GN=TCEA1 PE=4 SV=2 - [F1NP36_CHICK]	84.61	0.1787	2	3	3	3	291	32.4	8.51	0.101107	0.621531
Q5ZJU9	Uncharacterized protein OS=Gallus gallus GN=RCJMB04_15i13 PE=2 SV=1 - [Q5ZJU9_CHICK]	315.46	0.2868	1	2	10	20	530	56.3	8.1	0.00136683	0.993507
F1NHL4	Uncharacterized protein OS=Gallus gallus GN=LAP3 PE=3 SV=2 - [F1NHL4_CHICK]	378.88	0.3377	1	2	10	22	530	56.3	8.24	-0.107286	0.212585
F1P310	Uncharacterized protein (Fragment) OS=Gallus gallus GN=COQ9 PE=4 SV=2 - [F1P310_CHICK]	207.53	0.265	1	5	5	10	317	35.3	5.41	0.0793422	0.497042
E1BTQ4	Uncharacterized protein OS=Gallus gallus GN=LOC431660 PE=4 SV=1 - [E1BTQ4_CHICK]	101.75	0.137	1	3	3	7	146	16.1	9.32	0.195228	0.492493
E1BZP0	Uncharacterized protein (Fragment) OS=Gallus gallus GN=PARS2 PE=4 SV=2 - [E1BZP0_CHICK]	95.51	0.0915	1	3	3	3	437	48.5	7.25	-0.0818333	0.266655
A2N890	VH1 protein (Fragment) OS=Gallus gallus GN=VH1 PE=2 SV=1 - [A2N890_CHICK]	57.83	0.2167	3	2	2	3	120	12.3	8.91	0.029548	0.811181
Q5ZMP2	Uncharacterized protein OS=Gallus gallus GN=STX7 PE=2 SV=1 - [Q5ZMP2_CHICK]	101.09	0.2558	1	5	5	8	258	29.3	5.43	0.0496956	0.631745
Q5F370	Uncharacterized protein OS=Gallus gallus GN=RCJMB04_30n4 PE=2 SV=1 - [Q5F370_CHICK]	194.94	0.2363	2	6	6	15	347	37.6	5.96	0.0358671	0.779276
Q5F3U7	Uncharacterized protein OS=Gallus gallus GN=RCJMB04_6o2 PE=2 SV=1 - [Q5F3U7_CHICK]	52.16	0.0332	2	2	2	3	722	79	7.06	-0.0349563	0.713868
F1NIY7	Uncharacterized protein OS=Gallus gallus GN=MAOA PE=2 SV=1 - [F1NIY7_CHICK]	123.25	0.1517	2	5	5	14	422	48.2	8.53	-0.057775	0.567875
F1NWH5	Uncharacterized protein OS=Gallus gallus GN=AQP3 PE=3 SV=2 - [F1NWH5_CHICK]	72.31	0.0445	1	2	2	5	292	31.4	7.2	0.0296841	0.646953
F1NPG7	Uncharacterized protein (Fragment) OS=Gallus gallus GN=Gga.56200 PE=4 SV=2 - [F1NPG7_CHICK]	193.06	0.0332	1	6	6	11	2321	251.6	6.68	0.106264	0.123716
E1BYE0	Uncharacterized protein (Fragment) OS=Gallus gallus GN=LOC415852 PE=4 SV=2 - [E1BYE0_CHICK]	104.91	0.151	1	3	3	4	298	34.4	7.47	0.0177394	0.810247
F1P4U8	Uncharacterized protein (Fragment) OS=Gallus gallus GN=LOC100857197 PE=4 SV=2 - [F1P4U8_CHICK]	335.04	0.2237	1	12	12	22	599	64.5	5.99	-0.00541996	0.946105
E1BZ63	Uncharacterized protein OS=Gallus gallus GN=CHCHD3 PE=4 SV=2 - [E1BZ63_CHICK]	62.42	0.1579	1	2	2	5	133	15.6	8.44	0.106405	0.493953
F1NG89	Ubiquitin carboxyl-terminal hydrolase (Fragment) OS=Gallus gallus GN=USP10 PE=2 SV=2 - [F1NG89_CHICK]	153.53	0.0887	2	5	5	6	778	85.7	5.05	0.133843	0.174737
E1C7P7	Uncharacterized protein OS=Gallus gallus GN=ABHD6 PE=4 SV=1 - [E1C7P7_CHICK]	70.29	0.1006	1	3	3	6	338	38.4	8.41	0.0359662	0.686009
E1C771	Uncharacterized protein OS=Gallus gallus GN=FGGY PE=4 SV=2 - [E1C771_CHICK]	212.97	0.2178	1	7	7	8	551	60	6.98	0.023036	0.8624
F1NA58	Uncharacterized protein (Fragment) OS=Gallus gallus PE=3 SV=2 - [F1NA58_CHICK]	233.86	0.2053	1	6	6	19	487	51.5	5.48	-0.0777025	0.0317262
F1NSC1	Uncharacterized protein OS=Gallus gallus GN=ATP5F1 PE=4 SV=2 - [F1NSC1_CHICK]	281.69	0.3059	1	8	8	34	255	28.6	9.19	0.0837715	0.403522
E1BRU3	Uncharacterized protein OS=Gallus gallus GN=LOC100858247 PE=4 SV=2 - [E1BRU3_CHICK]	101.27	0.0996	2	4	4	6	522	58.5	10.17	-0.081327	0.409608
Q90642	Cell division cycle control protein 37 OS=Gallus gallus GN=cdc37 PE=2 SV=1 - [Q90642_CHICK]	62.11	0.1585	2	3	3	5	246	29.3	5.91	0.0061276	0.952108
F1P581	Uncharacterized protein (Fragment) OS=Gallus gallus GN=H6PD PE=4 SV=2 - [F1P581_CHICK]	263.7	0.1616	1	10	10	15	792	89.5	7.06	0.0736389	0.17774
E1BWV6	Uncharacterized protein (Fragment) OS=Gallus gallus GN=MRPL21 PE=4 SV=2 - [E1BWV6_CHICK]	92	0.1845	1	2	2	2	168	19.3	9.42	0.0520722	0.72714
F1N8B2	Golgi apparatus protein 1 (Fragment) OS=Gallus gallus GN=GLG1 PE=4 SV=1 - [F1N8B2_CHICK]	243.65	0.118	2	9	9	9	1034	119	6.65	-0.107223	0.101333
R4GHI5	Uncharacterized protein (Fragment) OS=Gallus gallus GN=LOC100857155 PE=3 SV=1 - [R4GHI5_CHICK]	23.62	0.0495	1	1	1	1	222	23.5	8.72	-0.053523	0.310863
F1NY29	Uncharacterized protein OS=Gallus gallus GN=ETFDH PE=4 SV=1 - [F1NY29_CHICK]	507.12	0.3312	2	12	12	69	477	53.1	8.82	-0.075805	0.435011
F1NWD4	Peptide-N(4)-(N-acetyl-beta-glucosaminyl)asparagine amidase OS=Gallus gallus GN=NGLY1 PE=2 SV=1 - [F1NWD4_CHICK]	70.68	0.0522	2	3	3	3	651	74	7.87	0.0779492	0.269497
F1NIQ4	Uncharacterized protein (Fragment) OS=Gallus gallus GN=TOM1L2 PE=4 SV=1 - [F1NIQ4_CHICK]	39.41	0.0178	1	1	1	2	507	55.8	4.89	0.114077	0.0797697
F1NSV1	Sulfhydryl oxidase OS=Gallus gallus GN=GFER PE=3 SV=2 - [F1NSV1_CHICK]	54.28	0.1885	1	2	2	5	191	21.4	6.21	-0.0349963	0.698616
R4GLY1	Uncharacterized protein OS=Gallus gallus GN=LOC776920 PE=4 SV=1 - [R4GLY1_CHICK]	24.34	0.0438	1	1	1	1	320	34.7	6.93	-0.233954	0.14164
Q5ZMB8	Uncharacterized protein OS=Gallus gallus GN=PSMC2 PE=2 SV=1 - [Q5ZMB8_CHICK]	465.18	0.3972	1	14	14	32	433	48.6	5.95	-0.0165724	0.690957
E1C3L7	Uncharacterized protein OS=Gallus gallus PE=4 SV=2 - [E1C3L7_CHICK]	276.65	0.166	1	10	10	15	771	87.6	4.86	-0.00158687	0.975974
Q5ZL83	Uncharacterized protein OS=Gallus gallus GN=SUCLG1 PE=2 SV=1 - [Q5ZL83_CHICK]	178.43	0.2145	1	5	5	20	331	34.8	9.44	0.0516848	0.352882
F1NPG9	DCN1-like protein (Fragment) OS=Gallus gallus GN=DCUN1D1 PE=2 SV=1 - [F1NPG9_CHICK]	42.44	0.1085	2	2	2	2	258	30	5.34	0.0447802	0.65679
F1P4H4	Uncharacterized protein OS=Gallus gallus GN=TXNDC5 PE=3 SV=1 - [F1P4H4_CHICK]	209.85	0.2585	2	9	9	16	414	46.4	6.02	0.00774544	0.945708
E1BRE5	Uncharacterized protein OS=Gallus gallus GN=EEA1 PE=4 SV=2 - [E1BRE5_CHICK]	190.63	0.0625	1	7	7	10	1409	161.6	5.73	0.0799335	0.508184
E1BRB2	Uncharacterized protein OS=Gallus gallus GN=DHRS3 PE=4 SV=1 - [E1BRB2_CHICK]	21.37	0.0464	1	1	1	2	302	33.5	8.87	-0.103674	0.221751
F1NNQ9	Uncharacterized protein (Fragment) OS=Gallus gallus GN=PRPF4 PE=4 SV=2 - [F1NNQ9_CHICK]	80.15	0.052	1	2	2	4	538	59.9	8.06	0.0269951	0.811797
R4GL59	Uncharacterized protein OS=Gallus gallus GN=GSR PE=4 SV=1 - [R4GL59_CHICK]	98.27	0.146	2	4	4	5	411	45.2	6.92	0.106937	0.472254
F1P438	Uncharacterized protein (Fragment) OS=Gallus gallus GN=ATP11C PE=4 SV=1 - [F1P438_CHICK]	191.8	0.0741	1	6	6	8	1134	130	6.99	0.0371851	0.649447
F1N834	Uncharacterized protein OS=Gallus gallus GN=PHYH PE=4 SV=2 - [F1N834_CHICK]	183.64	0.2024	1	7	7	10	336	39.1	7.24	0.181062	0.122992
E1BXD1	Uncharacterized protein OS=Gallus gallus GN=STEAP3 PE=4 SV=2 - [E1BXD1_CHICK]	330.98	0.3094	1	10	10	19	488	54.6	9.03	0.103773	0.03209
F1NDN9	Keratin, type I cytoskeletal 19 OS=Gallus gallus GN=KRT19 PE=3 SV=1 - [F1NDN9_CHICK]	229.83	0.2411	2	6	6	8	423	46	5.05	-0.459683	0.0465679
F1NBD0	Uncharacterized protein OS=Gallus gallus GN=ERLIN2 PE=4 SV=2 - [F1NBD0_CHICK]	237.64	0.3596	1	6	8	17	342	38.2	5.72	-0.00981774	0.79905
E1C224	Uncharacterized protein OS=Gallus gallus GN=VPS13C PE=4 SV=2 - [E1C224_CHICK]	10.7	0.0032	1	1	1	1	3752	421.7	6.77	0.326175	0.277177
F1NIM4	Uncharacterized protein OS=Gallus gallus GN=FKBP4 PE=2 SV=1 - [F1NIM4_CHICK]	326.24	0.3552	3	11	11	26	442	50.4	5.68	0.0230461	0.732721
R4GIY9	Uncharacterized protein OS=Gallus gallus GN=LOC100858751 PE=4 SV=1 - [R4GIY9_CHICK]	187.02	0.1906	1	4	4	8	320	36.3	5.19	-0.246357	0.173187
Q6EE39	Ribosomal protein L19 (Fragment) OS=Gallus gallus PE=2 SV=1 - [Q6EE39_CHICK]	28.64	0.046	3	1	1	1	174	20.8	11.56	-0.061588	0.735293
Q6J4Y8	FUS/TLS OS=Gallus gallus PE=1 SV=1 - [Q6J4Y8_CHICK]	184.52	0.0893	3	5	5	16	504	52.3	9.44	0.0470692	0.75282
E1C6Q6	Uncharacterized protein OS=Gallus gallus GN=LRRC57 PE=4 SV=1 - [E1C6Q6_CHICK]	70.3	0.0924	1	2	2	3	238	26.7	8.65	-0.00654934	0.960113
F1NT80	Uncharacterized protein OS=Gallus gallus GN=ATAD1 PE=4 SV=2 - [F1NT80_CHICK]	67.3	0.0691	1	2	2	3	362	41	6.99	-0.0771096	0.292664
F1NU79	Uncharacterized protein (Fragment) OS=Gallus gallus GN=PSMC5 PE=4 SV=1 - [F1NU79_CHICK]	380.96	0.3641	2	11	12	17	412	46.2	7.55	-0.0148785	0.753903
F1NLJ3	Uncharacterized protein (Fragment) OS=Gallus gallus GN=RPS6KA3 PE=4 SV=2 - [F1NLJ3_CHICK]	73.76	0.0478	1	3	3	3	712	80.6	7.39	-0.0868634	0.359763
R4GGZ6	Uncharacterized protein OS=Gallus gallus PE=4 SV=1 - [R4GGZ6_CHICK]	27.11	0.0273	1	1	1	1	330	36	8.13	-0.0254406	0.827087
F1NIZ6	Uncharacterized protein (Fragment) OS=Gallus gallus GN=UBE2L3 PE=3 SV=2 - [F1NIZ6_CHICK]	292.49	0.6622	2	6	6	32	148	17.2	7.24	0.0735218	0.67401
F1NDD6	Uncharacterized protein OS=Gallus gallus GN=LRPAP1 PE=2 SV=1 - [F1NDD6_CHICK]	130.88	0.1552	2	5	5	7	348	40.8	8.18	-0.0304099	0.832336
F1P0Y4	Uncharacterized protein OS=Gallus gallus GN=SCAF4 PE=4 SV=1 - [F1P0Y4_CHICK]	33.6	0.011	3	1	1	1	1092	120.8	9.54	-0.218091	0.0120003
F1NNS8	Uncharacterized protein (Fragment) OS=Gallus gallus GN=PRDX4 PE=4 SV=1 - [F1NNS8_CHICK]	394.19	0.5208	1	12	12	38	288	32.1	8.4	-0.0203191	0.786812
H9L0B0	Uncharacterized protein OS=Gallus gallus GN=TOMM40L PE=4 SV=2 - [H9L0B0_CHICK]	37	0.1429	1	2	2	3	161	17.6	7.55	-0.233116	0.126709
E1BW83	Uncharacterized protein (Fragment) OS=Gallus gallus GN=SLC25A24 PE=3 SV=2 - [E1BW83_CHICK]	74.51	0.06	1	2	2	3	467	51.9	8.46	-0.204965	0.168203
F1NRM5	Actin-related protein 2 (Fragment) OS=Gallus gallus GN=ACTR2 PE=2 SV=1 - [F1NRM5_CHICK]	409.5	0.3704	2	8	9	33	378	43	6.74	-0.0351008	0.355092
Q90WR6	Sulfotransferase 1C OS=Gallus gallus GN=SULT1C PE=2 SV=1 - [Q90WR6_CHICK]	458.25	0.6547	1	15	16	55	307	36.2	7.17	-0.0866368	0.395115
F1NJ94	Uncharacterized protein OS=Gallus gallus GN=ERLIN1 PE=4 SV=2 - [F1NJ94_CHICK]	131.93	0.157	2	2	4	12	363	40.8	8.15	-0.0230837	0.522696
F1P1B7	Uncharacterized protein OS=Gallus gallus GN=NAP1L4 PE=3 SV=1 - [F1P1B7_CHICK]	175.36	0.2633	2	5	7	11	376	42.9	4.61	0.0157433	0.804033
F1NMA3	Sulfotransferase family cytosolic 1B member 1 OS=Gallus gallus GN=SULT1B1 PE=4 SV=2 - [F1NMA3_CHICK]	182.63	0.2297	1	3	4	8	296	34	6.67	0.33174	0.0335813
E1C0Z4	Galectin (Fragment) OS=Gallus gallus GN=LGALS2 PE=1 SV=2 - [E1C0Z4_CHICK]	102.7	0.2636	1	4	4	4	129	14.8	7.02	-0.132934	0.370843
R4GI26	Uncharacterized protein OS=Gallus gallus GN=GNA13 PE=4 SV=1 - [R4GI26_CHICK]	128.03	0.1645	5	4	5	10	377	43.7	7.75	0.0388979	0.158164
Q0P0G7	Sf3a2 (Fragment) OS=Gallus gallus GN=SF3a2 PE=2 SV=1 - [Q0P0G7_CHICK]	44.14	0.1807	2	3	3	4	249	27.6	9.85	-0.0860301	0.0873643
R4GJF8	TAR DNA-binding protein 43 OS=Gallus gallus GN=TARDBP PE=4 SV=1 - [R4GJF8_CHICK]	70.07	0.0928	3	2	2	5	388	42.2	6.19	0.0201352	0.707987
H9L1F4	Perilipin OS=Gallus gallus GN=LOC100857433 PE=3 SV=2 - [H9L1F4_CHICK]	195.12	0.1244	1	4	4	11	426	45.2	6.74	0.125262	0.497009
E1BZ47	Uncharacterized protein OS=Gallus gallus GN=LOC417973 PE=4 SV=1 - [E1BZ47_CHICK]	21.46	0.0432	1	1	1	1	324	37.6	5.62	#NUM!	#NUM!
E1BRL4	Synaptosomal-associated protein OS=Gallus gallus GN=SNAP23 PE=3 SV=1 - [E1BRL4_CHICK]	113.43	0.1962	1	3	3	7	209	23.6	5.01	-0.0893196	0.380785
F1P4N9	Uncharacterized protein OS=Gallus gallus GN=POSTN PE=2 SV=1 - [F1P4N9_CHICK]	180.86	0.0999	3	4	4	5	841	94.1	8.07	0.0152457	0.926843
F1NDL4	Uncharacterized protein OS=Gallus gallus GN=NID2 PE=4 SV=2 - [F1NDL4_CHICK]	147.01	0.0864	1	6	6	6	1215	130.9	5.72	-0.0935639	0.550121
E1C8V9	Uncharacterized protein OS=Gallus gallus GN=FAM136A PE=4 SV=1 - [E1C8V9_CHICK]	32.61	0.1579	1	1	1	1	76	8.5	8.88	-0.00964236	0.854118
E1C4D9	Uncharacterized protein OS=Gallus gallus PE=4 SV=1 - [E1C4D9_CHICK]	166.19	0.2222	1	4	4	10	171	18.7	8.48	-0.0991985	0.651142
Q5ZMN5	Uncharacterized protein OS=Gallus gallus GN=RCJMB04_1i20 PE=2 SV=1 - [Q5ZMN5_CHICK]	35.71	0.031	1	1	1	2	420	45.1	5.97	-0.0747026	0.509015
F1P0L3	Uncharacterized protein OS=Gallus gallus GN=CLYBL PE=4 SV=2 - [F1P0L3_CHICK]	142.83	0.2538	1	4	4	6	264	29.4	7.61	0.122817	0.142436
F1NEN8	Uncharacterized protein OS=Gallus gallus GN=LIAS PE=3 SV=2 - [F1NEN8_CHICK]	23.92	0.0277	1	1	1	1	397	44	9.23	-0.674352	0.111917
E1C003	Choline dehydrogenase OS=Gallus gallus GN=CHDH PE=3 SV=2 - [E1C003_CHICK]	393.46	0.3061	1	12	12	30	611	68.3	8.91	-0.00422156	0.924556
F1N9J1	Uncharacterized protein OS=Gallus gallus GN=GYG1 PE=4 SV=1 - [F1N9J1_CHICK]	97.34	0.1536	2	4	4	6	332	37.2	4.78	-0.0215256	0.695416
D0VWW3	Succinate dehydrogenase cytochrome b, large subunit OS=Gallus gallus PE=1 SV=1 - [D0VWW3_CHICK]	57.33	0.15	2	2	2	4	140	15.4	9.7	-0.192542	0.14496
E1BQR3	Uncharacterized protein OS=Gallus gallus GN=OSTBETA PE=4 SV=1 - [E1BQR3_CHICK]	52.87	0.0629	1	2	2	5	286	32	5.38	-0.00882919	0.942669
F1P3G4	Uncharacterized protein OS=Gallus gallus GN=LOC771753 PE=4 SV=2 - [F1P3G4_CHICK]	197.56	0.1502	1	5	5	11	466	51.1	8.94	0.0265845	0.659812
F1NNV7	Uncharacterized protein OS=Gallus gallus GN=APOO PE=4 SV=2 - [F1NNV7_CHICK]	192.02	0.2785	1	4	4	16	219	24.1	8.91	-0.0119779	0.924403
Q49B65	EF hand-containing protein 1 OS=Gallus gallus GN=EFHD1 PE=2 SV=1 - [Q49B65_CHICK]	182.46	0.1933	1	4	4	17	238	26.9	5.11	-0.183755	0.1714
E1C455	Uncharacterized protein OS=Gallus gallus GN=CZH9orf64 PE=4 SV=2 - [E1C455_CHICK]	210	0.2493	1	6	6	10	341	39	6.15	-0.03348	0.479145
F1NG69	Uncharacterized protein OS=Gallus gallus GN=HSD17B7 PE=4 SV=2 - [F1NG69_CHICK]	169.3	0.1837	1	4	4	4	332	37.3	7.71	-0.0884291	0.460838
Q90ZK7	Peptidyl-prolyl cis-trans isomerase OS=Gallus gallus GN=FKBP25 PE=2 SV=1 - [Q90ZK7_CHICK]	432.98	0.511	1	9	9	72	227	25	9.19	0.0496714	0.586591
E1C275	Uncharacterized protein (Fragment) OS=Gallus gallus GN=ZNF207 PE=4 SV=2 - [E1C275_CHICK]	103.66	0.0782	1	4	4	6	499	53.1	9.1	-0.0583957	0.217902
E1BZ81	Uncharacterized protein OS=Gallus gallus GN=DPP7 PE=4 SV=1 - [E1BZ81_CHICK]	297.17	0.2182	1	8	8	21	495	54.5	6.2	0.0638776	0.705968
F1NRT4	Uncharacterized protein (Fragment) OS=Gallus gallus GN=COQ3 PE=4 SV=2 - [F1NRT4_CHICK]	143.16	0.1947	1	4	4	6	303	33.4	5.29	0.0174738	0.716638
F1P337	Uncharacterized protein OS=Gallus gallus GN=SNX5 PE=2 SV=1 - [F1P337_CHICK]	233.56	0.2418	2	8	9	17	397	45.7	7.24	0.135934	0.255666
E1BXY6	Uncharacterized protein OS=Gallus gallus GN=GOLGA3 PE=4 SV=2 - [E1BXY6_CHICK]	73.27	0.0184	1	2	2	3	1519	171.2	5.21	0.298808	0.00414823
F1N9Z7	Succinyl-CoA:3-ketoacid-coenzyme A transferase OS=Gallus gallus GN=OXCT1 PE=3 SV=2 - [F1N9Z7_CHICK]	258.59	0.1605	2	8	8	13	517	56.1	7.91	-0.00673016	0.923212
Q5F3L2	Uncharacterized protein OS=Gallus gallus GN=RCJMB04_14f6 PE=2 SV=1 - [Q5F3L2_CHICK]	157.79	0.2165	2	6	6	10	425	45.5	8.13	-0.0765833	0.664834
R4GM93	Uncharacterized protein (Fragment) OS=Gallus gallus GN=DUSP3 PE=4 SV=1 - [R4GM93_CHICK]	29.63	0.0764	1	1	1	1	144	16.4	9.03	0.191687	0.411574
F1NA55	Eukaryotic translation initiation factor 2A OS=Gallus gallus GN=EIF2A PE=2 SV=2 - [F1NA55_CHICK]	50.99	0.0492	2	2	2	3	569	62.7	8.79	0.121704	0.345179
F1P5B6	Uncharacterized protein OS=Gallus gallus GN=GNG11 PE=3 SV=2 - [F1P5B6_CHICK]	308.05	0.2484	1	7	7	19	455	49.5	8.79	0.102121	0.0974026
F1NG44	Uncharacterized protein OS=Gallus gallus GN=CISD1 PE=4 SV=2 - [F1NG44_CHICK]	137.19	0.4444	1	3	3	35	108	11.9	8.57	0.0144026	0.887301
F1P3C0	Uncharacterized protein OS=Gallus gallus GN=RFC3 PE=4 SV=1 - [F1P3C0_CHICK]	27.3	0.0337	2	1	1	1	356	40.4	8.07	-0.0550459	0.451965
Q5ZKG7	Putative uncharacterized protein OS=Gallus gallus GN=RCJMB04_10o24 PE=2 SV=1 - [Q5ZKG7_CHICK]	24.45	0.0674	3	1	1	2	193	21.7	5.17	0.139362	0.454785
E1BSI6	Uncharacterized protein (Fragment) OS=Gallus gallus GN=MRPS25 PE=4 SV=2 - [E1BSI6_CHICK]	27.92	0.0543	1	1	1	1	184	21.1	9.36	-0.286218	0.181021
H9L011	Uncharacterized protein OS=Gallus gallus GN=LOC426023 PE=4 SV=2 - [H9L011_CHICK]	311.43	0.1952	3	7	7	30	456	47.5	7.85	0.105941	0.172845
E1BTF5	Uncharacterized protein OS=Gallus gallus GN=AGK PE=4 SV=2 - [E1BTF5_CHICK]	76.05	0.1072	2	4	4	4	457	51.1	8.87	-0.0842663	0.397085
Q9DGN6	Endothelin converting enzyme-1 OS=Gallus gallus GN=ECE-1 PE=2 SV=1 - [Q9DGN6_CHICK]	63.49	0.0332	1	2	2	2	752	84.9	5.22	-0.114602	0.063082
F1NSS6	Uncharacterized protein OS=Gallus gallus GN=ECHDC2 PE=3 SV=2 - [F1NSS6_CHICK]	169.09	0.2091	1	4	4	9	287	30.9	8.88	-0.170255	0.113786
E1C6J4	Uncharacterized protein OS=Gallus gallus GN=VWF PE=4 SV=2 - [E1C6J4_CHICK]	28	0.0047	3	1	1	1	2775	309.5	5.71	-0.238559	0.173202
F1P4F3	Lymphocyte antigen 86 OS=Gallus gallus GN=LY86 PE=4 SV=1 - [F1P4F3_CHICK]	156.31	0.3188	2	4	4	7	160	18	5.9	0.0593397	0.437878
R4GJZ4	Uncharacterized protein (Fragment) OS=Gallus gallus GN=PURB PE=4 SV=1 - [R4GJZ4_CHICK]	83.07	0.1815	1	3	3	7	248	27.7	9.1	0.0971781	0.44403
F1NVB1	Uncharacterized protein OS=Gallus gallus GN=PTPRC PE=4 SV=2 - [F1NVB1_CHICK]	83.34	0.0291	2	4	4	6	1237	139.3	5.76	-0.128609	0.268285
E1C3C6	Uncharacterized protein OS=Gallus gallus GN=ATP6V1G1 PE=4 SV=1 - [E1C3C6_CHICK]	59.83	0.2881	1	2	2	5	118	13.5	9.26	-0.0149067	0.885621
F1NBV3	Uncharacterized protein OS=Gallus gallus GN=L2HGDH PE=4 SV=2 - [F1NBV3_CHICK]	330.01	0.3235	1	9	9	22	442	48.6	7.96	-0.103481	0.433867
R4GL20	Uncharacterized protein (Fragment) OS=Gallus gallus GN=Gga.54236 PE=4 SV=1 - [R4GL20_CHICK]	68.49	0.0852	1	2	2	5	364	40.5	8.34	0.0197037	0.811608
F1NCE1	Uncharacterized protein OS=Gallus gallus GN=EIF3D PE=4 SV=2 - [F1NCE1_CHICK]	145.45	0.1932	2	4	4	9	295	34.7	9.47	-0.00758581	0.818688
Q6Q122	NADH dehydrogenase [ubiquinone] 1 subunit C2 OS=Gallus gallus GN=NDUFC2 PE=3 SV=1 - [Q6Q122_CHICK]	42.9	0.2083	1	2	2	3	96	11	9.25	0.093767	0.294872
R4GIW5	Phosphatidylinositol 5-phosphate 4-kinase type-2 alpha OS=Gallus gallus GN=PIP4K2A PE=4 SV=1 - [R4GIW5_CHICK]	43.54	0.0719	4	2	2	4	334	38.4	6.21	-0.135576	0.0150838
F1P494	Uncharacterized protein (Fragment) OS=Gallus gallus GN=TGFBI PE=4 SV=2 - [F1P494_CHICK]	226.14	0.1215	2	5	5	6	642	70.4	6.86	-0.0912206	0.251648
E1BSK7	Uncharacterized protein (Fragment) OS=Gallus gallus GN=MCEE PE=4 SV=2 - [E1BSK7_CHICK]	148.18	0.4489	1	5	5	10	176	19.4	8.57	0.0172493	0.792366
R4GLP7	Citrate synthase OS=Gallus gallus GN=LOC100858903 PE=3 SV=1 - [R4GLP7_CHICK]	90.38	0.1126	1	1	4	7	382	42.5	6.99	-2.42111	0.0794226
F1NJV4	Protein-L-isoaspartate O-methyltransferase OS=Gallus gallus GN=PCMT1 PE=2 SV=1 - [F1NJV4_CHICK]	105.12	0.3096	2	3	3	5	197	21.2	5.78	0.0348378	0.70656
F1NH21	Hsc70-interacting protein OS=Gallus gallus GN=ST13 PE=4 SV=1 - [F1NH21_CHICK]	268.98	0.3158	2	8	8	35	361	40.2	5.14	0.00753546	0.913364
F1NHD8	Uncharacterized protein (Fragment) OS=Gallus gallus GN=PDCD6 PE=4 SV=1 - [F1NHD8_CHICK]	24.73	0.0588	1	1	1	1	187	21.6	5.68	0.17763	0.039644
F1ND93	Uncharacterized protein OS=Gallus gallus GN=PTCD3 PE=4 SV=2 - [F1ND93_CHICK]	163.03	0.1282	1	6	6	7	671	76.4	5.92	-0.0248414	0.800617
H9L0R7	Uncharacterized protein OS=Gallus gallus GN=LOC426881 PE=3 SV=2 - [H9L0R7_CHICK]	107.4	0.1508	1	3	4	6	358	38.6	6.71	-0.141917	0.312323
F1NZZ2	Uncharacterized protein OS=Gallus gallus GN=LAMA5 PE=4 SV=2 - [F1NZZ2_CHICK]	343.03	0.0397	1	9	9	9	3451	379.6	6.73	-0.0157853	0.885803
R4GH71	Uncharacterized protein OS=Gallus gallus GN=DAG1 PE=4 SV=1 - [R4GH71_CHICK]	48.46	0.0268	2	2	2	2	896	97.6	8.48	0.0826503	0.332926
E1BTY5	Uncharacterized protein OS=Gallus gallus GN=C2H18orf55 PE=4 SV=1 - [E1BTY5_CHICK]	47.23	0.1082	1	2	2	4	231	25.5	9.63	-0.0440271	0.699784
Q5ZHW3	Uncharacterized protein OS=Gallus gallus GN=RCJMB04_32k7 PE=2 SV=1 - [Q5ZHW3_CHICK]	43.14	0.0395	2	1	1	3	329	37.3	6.98	0.0641034	0.77722
A7E3K8	Predicted NADPH oxidase-2 OS=Gallus gallus GN=Nox2 PE=2 SV=1 - [A7E3K8_CHICK]	65.1	0.0228	1	1	1	3	571	65.5	8.13	-0.165381	0.375023
E1C7T1	Uncharacterized protein OS=Gallus gallus GN=SERPINA1 PE=3 SV=1 - [E1C7T1_CHICK]	119.95	0.1035	1	3	3	5	425	48.7	6.54	-0.217569	0.0519476
E1BWJ6	Uncharacterized protein OS=Gallus gallus PE=4 SV=2 - [E1BWJ6_CHICK]	28.07	0.0168	1	1	1	1	535	57.7	5.74	-0.0443799	0.800531
E1C786	Uncharacterized protein OS=Gallus gallus PE=4 SV=2 - [E1C786_CHICK]	33.77	0.0645	1	1	1	3	186	20.2	6.13	0.0530371	0.438378
F1P474	Uncharacterized protein (Fragment) OS=Gallus gallus GN=D2HGDH PE=4 SV=2 - [F1P474_CHICK]	167.19	0.1267	1	4	4	8	521	57.1	7.65	-0.0240517	0.746716
E1BXC8	Uncharacterized protein OS=Gallus gallus GN=SEC31B PE=4 SV=2 - [E1BXC8_CHICK]	308.07	0.1346	2	7	7	33	728	80.7	5.76	-0.0408967	0.381269
E1C9H4	Uncharacterized protein OS=Gallus gallus GN=MRPS17 PE=4 SV=1 - [E1C9H4_CHICK]	31.24	0.0657	1	1	1	1	137	15.5	9.67	0.0371128	0.749645
Q5ZIH7	Uncharacterized protein OS=Gallus gallus GN=RCJMB04_26b22 PE=2 SV=1 - [Q5ZIH7_CHICK]	55.02	0.1429	1	2	2	3	126	13.4	4.45	0.0310579	0.670675
F1NDG1	Uncharacterized protein (Fragment) OS=Gallus gallus GN=MAPK14 PE=4 SV=2 - [F1NDG1_CHICK]	90.52	0.1543	1	4	4	4	363	41.7	5.49	-0.00697503	0.91136
Q5ZIY8	Uncharacterized protein OS=Gallus gallus GN=RNH1 PE=2 SV=1 - [Q5ZIY8_CHICK]	297.41	0.4605	1	13	13	17	456	49.8	5.02	0.00777131	0.930407
Q5ZJZ9	Uncharacterized protein OS=Gallus gallus GN=RCJMB04_14b8 PE=2 SV=1 - [Q5ZJZ9_CHICK]	120.44	0.064	1	3	3	4	578	64.6	8.09	-0.0903865	0.431473
F1N8Z4	Uncharacterized protein OS=Gallus gallus GN=RUVBL1 PE=4 SV=1 - [F1N8Z4_CHICK]	347	0.3004	2	10	10	21	456	50.1	6.42	-0.0286402	0.172021
R4GJ79	Uncharacterized protein (Fragment) OS=Gallus gallus GN=LOC100857958 PE=4 SV=1 - [R4GJ79_CHICK]	35.97	0.0884	1	1	1	2	147	16.6	5.25	-0.00961439	0.900433
E1BX11	Uncharacterized protein OS=Gallus gallus GN=SPCS1 PE=4 SV=2 - [E1BX11_CHICK]	22.87	0.0369	1	1	1	1	244	27.2	4.54	0.0642473	0.300167
O42417	Serine protease (Fragment) OS=Gallus gallus PE=2 SV=1 - [O42417_CHICK]	263.17	0.201	2	5	5	11	403	43.1	9.94	0.0822802	0.00563661
E1BT18	Uncharacterized protein OS=Gallus gallus GN=SLC27A4 PE=4 SV=2 - [E1BT18_CHICK]	232.19	0.168	1	8	8	13	643	72.6	8.43	-0.0783863	0.217856
F1NIX4	Uncharacterized protein (Fragment) OS=Gallus gallus GN=MECR PE=4 SV=2 - [F1NIX4_CHICK]	279.99	0.3434	1	7	7	20	364	39	8.62	0.0360027	0.60935
F1NCD7	Uncharacterized protein OS=Gallus gallus GN=PIN4 PE=4 SV=2 - [F1NCD7_CHICK]	54.17	0.096	1	1	1	2	125	13.2	9.7	0.0563422	0.518283
Q5ZK23	Uncharacterized protein OS=Gallus gallus GN=GLRX5 PE=2 SV=1 - [Q5ZK23_CHICK]	111.85	0.3642	1	5	5	9	162	17.4	8.05	0.0573007	0.519266
O57389	CNP2 OS=Gallus gallus GN=CNP PE=2 SV=1 - [O57389_CHICK]	148.13	0.1024	1	4	4	8	420	47.2	9.07	-0.233505	0.271612
F1NSQ1	Uncharacterized protein (Fragment) OS=Gallus gallus GN=AIMP2 PE=4 SV=2 - [F1NSQ1_CHICK]	81	0.2555	1	4	4	7	274	30.3	6.68	0.19318	0.0707181
F1P3J5	Lipase (Fragment) OS=Gallus gallus GN=LIPA PE=3 SV=2 - [F1P3J5_CHICK]	60.11	0.0721	1	2	2	2	402	45.7	8.81	0.073956	0.612241
E1BQN0	Uncharacterized protein OS=Gallus gallus GN=NDUFS6 PE=4 SV=1 - [E1BQN0_CHICK]	234.94	0.5938	1	6	6	21	128	14	9.03	0.0558371	0.665672
Q9PSS9	Gallus Gallus mRNA encoding a tropomyosin (probably non-muscle), homologous to a human heat stable cytoskeletal protein having an apparent molecular weight of 36000 Dalton (hscp 36). (Fragment) OS=Gallus gallus PE=2 SV=1 - [Q9PSS9_CHICK]	82.89	0.4231	1	2	2	4	78	8.9	4.41	0.114408	0.721731
K7XM59	Interferon-gamma-inducible lysosomal thiol reductase OS=Gallus gallus GN=GILT PE=2 SV=1 - [K7XM59_CHICK]	162.28	0.1779	2	3	3	11	253	27.5	5.9	0.0460223	0.508124
E1BTF7	Uncharacterized protein OS=Gallus gallus GN=AGPAT2 PE=4 SV=2 - [E1BTF7_CHICK]	34.28	0.0463	1	1	1	1	281	30.8	8.91	-0.205188	0.153883
R4GGF3	Uncharacterized protein OS=Gallus gallus GN=GLIPR2 PE=4 SV=1 - [R4GGF3_CHICK]	62.22	0.1688	1	2	2	2	154	16.9	9.42	-0.116865	0.578817
E1BQX1	Uncharacterized protein (Fragment) OS=Gallus gallus GN=FAM185A PE=4 SV=2 - [E1BQX1_CHICK]	37.08	0.0418	1	1	1	1	335	36.5	9.04	0.0946449	0.532127
F1NYA2	Uncharacterized protein OS=Gallus gallus GN=LOC100859865 PE=4 SV=1 - [F1NYA2_CHICK]	153.52	0.3836	2	3	3	8	146	16.2	5.72	0.12863	0.247504
Q5ZMF5	Putative uncharacterized protein OS=Gallus gallus GN=RCJMB04_2d15 PE=2 SV=1 - [Q5ZMF5_CHICK]	335.98	0.1886	3	10	10	35	599	68.1	4.56	-0.123591	0.212881
E1BYF5	Uncharacterized protein OS=Gallus gallus GN=MLLT4 PE=4 SV=2 - [E1BYF5_CHICK]	101.91	0.0293	1	4	4	6	1811	206.5	6.4	0.175876	0.0895723
F1P520	Uncharacterized protein OS=Gallus gallus GN=RPIA PE=3 SV=2 - [F1P520_CHICK]	248.81	0.3234	2	8	8	13	235	25.6	6.14	0.060706	0.212541
F1NEQ4	Uncharacterized protein OS=Gallus gallus PE=4 SV=2 - [F1NEQ4_CHICK]	215.35	0.0677	1	6	7	13	1330	150	6.06	-0.0481641	0.753879
E1BVC4	Uncharacterized protein OS=Gallus gallus GN=SEC13 PE=4 SV=1 - [E1BVC4_CHICK]	107.2	0.125	1	3	3	11	320	35.2	5.27	-0.134484	0.159668
F1NJD6	Uncharacterized protein OS=Gallus gallus GN=GDA PE=4 SV=2 - [F1NJD6_CHICK]	294.93	0.2622	1	6	6	9	450	50.2	5.77	-0.0383474	0.545921
F1NLV6	Uncharacterized protein OS=Gallus gallus GN=COBLL1 PE=4 SV=2 - [F1NLV6_CHICK]	93.94	0.0432	1	4	4	4	1157	127.6	7.53	-0.0421241	0.744111
E1BTI7	Uncharacterized protein OS=Gallus gallus GN=TINAG PE=3 SV=1 - [E1BTI7_CHICK]	144.73	0.1328	1	5	5	7	467	52.7	7.56	-0.145843	0.357408
E1C6T8	Eukaryotic translation initiation factor 3 subunit I OS=Gallus gallus GN=EIF3I PE=3 SV=1 - [E1C6T8_CHICK]	154.55	0.1785	1	5	5	11	325	36.5	5.64	0.0607951	0.347151
Q5ZJC0	Putative uncharacterized protein (Fragment) OS=Gallus gallus GN=RCJMB04_19g9 PE=2 SV=1 - [Q5ZJC0_CHICK]	31.21	0.0154	2	1	1	1	843	96.8	9.25	0.208596	0.270067
F1P104	Uncharacterized protein OS=Gallus gallus GN=FOXRED1 PE=4 SV=2 - [F1P104_CHICK]	67.49	0.0575	1	2	2	6	504	54.5	8.97	0.0177552	0.721624
R4GM83	Aldehyde dehydrogenase OS=Gallus gallus GN=ALDH3B1 PE=3 SV=1 - [R4GM83_CHICK]	26	0.0242	1	1	1	1	496	55.2	5.94	-0.116867	0.454459
F1NRI4	Uncharacterized protein (Fragment) OS=Gallus gallus GN=DYNLL2 PE=4 SV=1 - [F1NRI4_CHICK]	55.19	0.1978	1	1	2	5	91	10.6	7.37	-0.345107	0.209363
F1NNP6	Uncharacterized protein (Fragment) OS=Gallus gallus GN=GLRX3 PE=4 SV=1 - [F1NNP6_CHICK]	190.69	0.2189	1	6	6	13	338	37.3	5.6	0.0538152	0.346362
E1C203	Uncharacterized protein OS=Gallus gallus GN=DPT PE=4 SV=2 - [E1C203_CHICK]	50.68	0.0556	1	1	1	1	198	23.5	4.86	-0.10006	0.471583
R4GHM4	Uncharacterized protein OS=Gallus gallus GN=LOC100857484 PE=4 SV=1 - [R4GHM4_CHICK]	140.54	0.2237	1	4	4	16	228	25.9	7.4	-0.0462446	0.488194
H9KZN4	Uncharacterized protein OS=Gallus gallus GN=HK2 PE=3 SV=2 - [H9KZN4_CHICK]	254.28	0.1463	2	7	9	11	923	102.7	6.1	-0.105563	0.223022
E1C6V3	Uncharacterized protein OS=Gallus gallus GN=RUFY1 PE=4 SV=2 - [E1C6V3_CHICK]	26.6	0.0132	1	1	1	1	680	77.6	6.04	0.0274213	0.787282
A5HMN9	Muscleblind-like 3 isoform 6 OS=Gallus gallus GN=MBNL3 PE=2 SV=1 - [A5HMN9_CHICK]	22.25	0.032	13	1	1	2	281	31.1	8.63	-0.14017	0.201459
Q92070	Integrin beta OS=Gallus gallus GN=integrin beta 2 PE=2 SV=1 - [Q92070_CHICK]	79.27	0.0738	2	4	4	6	772	85.3	5.66	-0.0285126	0.712018
F1NDH2	Angiotensinogen OS=Gallus gallus GN=AGT PE=3 SV=2 - [F1NDH2_CHICK]	195.25	0.1573	1	6	6	11	464	51.3	5.39	-0.371154	0.0189338
E1C0V6	Protein pelota homolog OS=Gallus gallus GN=PELO PE=3 SV=2 - [E1C0V6_CHICK]	199.89	0.1039	3	8	8	13	1165	129.5	6.29	0.0570925	0.330754
F1NWF2	Uncharacterized protein OS=Gallus gallus GN=PRCP PE=4 SV=2 - [F1NWF2_CHICK]	57.4	0.0376	1	2	2	5	479	54.1	6.27	-0.0538632	0.523537
B3GS89	Transporter associated with antigen processing 2 (Fragment) OS=Gallus gallus PE=4 SV=1 - [B3GS89_CHICK]	87.61	0.0948	20	1	2	2	422	45.6	8.65	#NUM!	#NUM!
F1NMQ0	Uncharacterized protein (Fragment) OS=Gallus gallus GN=GOLGA4 PE=4 SV=2 - [F1NMQ0_CHICK]	71.65	0.017	1	3	3	4	2171	253.5	5.2	0.117685	0.106638
E1BZC7	Uncharacterized protein (Fragment) OS=Gallus gallus GN=LOC100858795 PE=4 SV=2 - [E1BZC7_CHICK]	91.25	0.1357	1	2	2	3	199	22.6	9.29	-0.0311913	0.872024
F1NI75	Uncharacterized protein OS=Gallus gallus GN=Gga.26475 PE=4 SV=2 - [F1NI75_CHICK]	92.28	0.0164	1	5	5	5	3476	398.6	5.45	-0.0547607	0.509989
R4GM61	Uncharacterized protein OS=Gallus gallus GN=PIPOX PE=4 SV=1 - [R4GM61_CHICK]	227.17	0.2385	1	6	6	11	390	42.4	8.13	0.213701	0.00825419
F1N8Y5	Uncharacterized protein OS=Gallus gallus GN=GORASP1 PE=4 SV=1 - [F1N8Y5_CHICK]	111.29	0.0939	2	3	3	7	426	45.4	4.64	-0.0240199	0.745564
F1NMN2	Uncharacterized protein OS=Gallus gallus GN=Gga.5085 PE=4 SV=2 - [F1NMN2_CHICK]	137.08	0.1802	1	1	5	12	405	44.3	5.96	-0.236352	0.436043
F1NGV1	Zinc finger CCCH domain-containing protein 15 (Fragment) OS=Gallus gallus GN=ZC3H15 PE=4 SV=2 - [F1NGV1_CHICK]	69.08	0.0981	2	3	3	4	428	48.7	5.1	0.195401	0.108319
Q2XP49	Deoxyribonuclease II OS=Gallus gallus GN=DNASE2 PE=2 SV=1 - [Q2XP49_CHICK]	200.13	0.2121	1	5	5	12	363	40.9	6.52	0.0290973	0.635364
E1BR36	Uncharacterized protein OS=Gallus gallus GN=ACTL6A PE=3 SV=2 - [E1BR36_CHICK]	125.02	0.1469	1	4	4	5	429	47.5	5.72	-0.0858138	0.278926
O42403	Attachment region binding protein (Fragment) OS=Gallus gallus GN=ARBP PE=1 SV=1 - [O42403_CHICK]	119.13	0.1541	1	4	4	7	344	33.6	10.65	-0.261627	0.00891448
Q9I9P1	TGF-beta response effector Smad3 (Fragment) OS=Gallus gallus PE=2 SV=1 - [Q9I9P1_CHICK]	21.59	0.0415	8	1	1	1	313	35.5	5.69	-0.250851	0.0719833
F1NW73	Uncharacterized protein OS=Gallus gallus GN=ABCA8 PE=3 SV=2 - [F1NW73_CHICK]	326.25	0.0964	1	10	10	23	1628	184.7	7.08	0.102506	0.261817
D2Z1L9	LIM and SH3 protein 1 OS=Gallus gallus GN=LASP1 PE=2 SV=1 - [D2Z1L9_CHICK]	86.41	0.1357	2	3	3	6	258	29.6	7.4	0.142175	0.175305
F1NQ35	Uncharacterized protein (Fragment) OS=Gallus gallus GN=RPL35A PE=4 SV=2 - [F1NQ35_CHICK]	20.3	0.0634	1	1	1	2	142	15.7	11.63	-0.254161	0.506197
F1P5T2	Uncharacterized protein OS=Gallus gallus GN=PHKG1 PE=4 SV=1 - [F1P5T2_CHICK]	44.56	0.0335	2	1	1	1	388	45.4	6.35	-0.0888259	0.686774
E1BQI2	Uncharacterized protein OS=Gallus gallus GN=RAP2A PE=4 SV=1 - [E1BQI2_CHICK]	52.46	0.1202	1	1	2	3	183	20.6	4.82	-0.219432	0.0648506
H9KYP7	Uncharacterized protein (Fragment) OS=Gallus gallus GN=PSMA5 PE=4 SV=2 - [H9KYP7_CHICK]	239.55	0.319	2	5	5	25	232	25.3	4.84	-0.0308432	0.613244
O57596	CEPU-Se alpha 2 isoform OS=Gallus gallus GN=CEPU PE=2 SV=1 - [O57596_CHICK]	103.87	0.0895	8	2	2	3	313	34.5	6.3	-0.0806598	0.659016
E1BU99	Uncharacterized protein OS=Gallus gallus GN=UPB1 PE=4 SV=1 - [E1BU99_CHICK]	624.06	0.3943	1	13	13	68	383	42.7	6.1	0.0411964	0.53622
F1P0A1	Uncharacterized protein OS=Gallus gallus GN=XPNPEP1 PE=3 SV=2 - [F1P0A1_CHICK]	305.02	0.199	1	8	8	19	623	70	6.15	0.0372258	0.488191
F1NIJ2	Uncharacterized protein OS=Gallus gallus GN=BAIAP2 PE=4 SV=2 - [F1NIJ2_CHICK]	38.71	0.026	1	1	1	2	500	55.6	8.43	-0.102085	0.477802
Q5ZLD9	Uncharacterized protein OS=Gallus gallus GN=RCJMB04_6j20 PE=2 SV=1 - [Q5ZLD9_CHICK]	66.65	0.056	1	2	2	3	393	43.2	8.31	-0.0717566	0.576246
E1BSN8	Uncharacterized protein OS=Gallus gallus GN=Gga.31055 PE=4 SV=1 - [E1BSN8_CHICK]	38.12	0.0149	1	1	1	1	803	90.5	7.27	-0.0734607	0.618774
Q90885	Leucine zipper protein OS=Gallus gallus PE=2 SV=1 - [Q90885_CHICK]	51.8	0.0734	3	2	2	3	354	40.4	5.48	-0.0324112	0.568068
E1BS97	Uncharacterized protein OS=Gallus gallus GN=PAK2 PE=4 SV=1 - [E1BS97_CHICK]	141.72	0.142	3	5	5	7	521	57.5	5.77	-0.0823055	0.253107
F1P5S9	Uncharacterized protein (Fragment) OS=Gallus gallus GN=THUMPD3 PE=4 SV=2 - [F1P5S9_CHICK]	157.05	0.11	1	4	4	7	491	54	7.06	0.023482	0.656727
F1P4G4	Uncharacterized protein OS=Gallus gallus GN=TBXAS1 PE=3 SV=2 - [F1P4G4_CHICK]	39.18	0.0243	1	1	1	1	535	60.7	7.36	-0.351002	0.0101003
E1BXK5	Uncharacterized protein (Fragment) OS=Gallus gallus PE=4 SV=2 - [E1BXK5_CHICK]	29.23	0.0148	1	1	1	2	813	92.3	6.1	-0.116301	0.605663
E1BZF7	Uncharacterized protein OS=Gallus gallus GN=Gga.3095 PE=4 SV=2 - [E1BZF7_CHICK]	176.82	0.1397	1	5	5	10	544	62	8.54	-0.059358	0.493649
F1P1A8	Uncharacterized protein OS=Gallus gallus GN=SMARCC1 PE=4 SV=2 - [F1P1A8_CHICK]	32.19	0.0111	1	1	1	1	988	110.5	5.47	-0.192029	0.19864
B5TAE6	ATP synthase protein 8 (Fragment) OS=Gallus gallus GN=ATP8 PE=3 SV=1 - [B5TAE6_CHICK]	66.5	0.6429	2	2	2	4	42	4.9	10.3	-0.217871	0.488954
R4GJM5	Uncharacterized protein OS=Gallus gallus GN=STBD1 PE=4 SV=1 - [R4GJM5_CHICK]	31.05	0.0538	1	1	1	1	223	25	4.68	0.193522	0.408946
Q9PVL6	Mitochondrial carrier homolog 2 OS=Gallus gallus GN=Mtch2 PE=2 SV=1 - [Q9PVL6_CHICK]	256.67	0.2341	1	5	5	45	299	33.1	9.31	0.0172205	0.842488
Q5ZL03	Uncharacterized protein OS=Gallus gallus GN=GCLM PE=2 SV=1 - [Q5ZL03_CHICK]	197.84	0.2214	1	4	4	7	271	30.2	5.19	0.0338994	0.34495
F1NAW2	Uncharacterized protein OS=Gallus gallus GN=CD2AP PE=4 SV=2 - [F1NAW2_CHICK]	87.75	0.0393	3	2	2	4	610	67.7	6.06	0.173046	0.389458
A4ZZ65	Calpain OS=Gallus gallus PE=2 SV=1 - [A4ZZ65_CHICK]	58.75	0.0567	3	2	3	4	705	80.3	5	-0.0238633	0.617208
O42133	Mu-calpain large subunit OS=Gallus gallus PE=2 SV=1 - [O42133_CHICK]	34.69	0.0322	1	1	2	2	715	81.4	6.11	0.106666	0.00835189
E1C459	Uncharacterized protein OS=Gallus gallus GN=MYO1D PE=4 SV=2 - [E1C459_CHICK]	141.05	0.0557	1	4	4	4	1041	118.7	9.26	-0.104119	0.0915556
F1NQL7	Uncharacterized protein OS=Gallus gallus GN=PPIP5K2 PE=4 SV=2 - [F1NQL7_CHICK]	86.33	0.0256	2	2	2	3	1249	140.8	6.64	-0.159564	0.283432
E1BXG0	Peptidyl-prolyl cis-trans isomerase OS=Gallus gallus GN=PPIH PE=3 SV=1 - [E1BXG0_CHICK]	61.15	0.0904	1	1	2	4	177	19.2	8.07	-0.0914776	0.417291
F1NVG1	Uncharacterized protein OS=Gallus gallus GN=ARVCF PE=4 SV=1 - [F1NVG1_CHICK]	163.79	0.0977	2	6	6	9	983	109.6	6.77	-0.0809452	0.148423
E1BXJ6	Uncharacterized protein OS=Gallus gallus GN=SHPK PE=4 SV=2 - [E1BXJ6_CHICK]	199.2	0.1923	1	6	6	10	468	50.5	6.1	-0.0337439	0.715295
R4GLM6	Peptidyl-prolyl cis-trans isomerase OS=Gallus gallus GN=LOC100859332 PE=3 SV=1 - [R4GLM6_CHICK]	24.33	0.0952	1	1	1	1	147	16.1	8.66	0.0514427	0.574993
E1BSP7	Uncharacterized protein OS=Gallus gallus GN=SORBS2 PE=4 SV=2 - [E1BSP7_CHICK]	81.5	0.036	1	3	3	3	1223	137	8.47	0.168978	0.288178
F1NWS6	Uncharacterized protein OS=Gallus gallus GN=GRSF1 PE=4 SV=2 - [F1NWS6_CHICK]	165.39	0.1954	1	5	5	14	394	44.2	6.96	-0.0501307	0.446329
Q5ZMI0	Uncharacterized protein OS=Gallus gallus GN=SRSF7 PE=2 SV=1 - [Q5ZMI0_CHICK]	102.94	0.1704	2	1	3	7	223	26	11.8	-0.0498081	0.594411
E1BVX5	Uncharacterized protein OS=Gallus gallus GN=LOC100859609 PE=4 SV=2 - [E1BVX5_CHICK]	96.5	0.132	1	1	3	6	250	28.7	11.87	0.0635832	0.743449
E1BWS2	Uncharacterized protein OS=Gallus gallus GN=NAPG PE=4 SV=1 - [E1BWS2_CHICK]	85.07	0.1051	1	3	3	4	314	35	5.63	0.11525	0.303053
Q9I9K3	Collagen IV a1 chain (Fragment) OS=Gallus gallus PE=2 SV=1 - [Q9I9K3_CHICK]	154.72	0.0654	3	4	4	6	979	95	8.03	-0.0905406	0.528556
F1N9D0	Uncharacterized protein (Fragment) OS=Gallus gallus GN=MAN1A1 PE=4 SV=2 - [F1N9D0_CHICK]	75.88	0.0938	1	3	3	7	469	53.6	6.25	0.0382515	0.513431
Q90ZN3	Laminin gamma 1 (Fragment) OS=Gallus gallus PE=2 SV=1 - [Q90ZN3_CHICK]	226.35	0.1092	2	7	7	20	1007	110.9	5.16	-0.146634	0.391448
F1NC49	Uncharacterized protein (Fragment) OS=Gallus gallus GN=AARSD1 PE=4 SV=2 - [F1NC49_CHICK]	93.1	0.0618	1	2	2	2	534	60.2	5.53	-0.0299774	0.908336
Q5ZJA2	Anamorsin OS=Gallus gallus GN=CIAPIN1 PE=2 SV=1 - [CPIN1_CHICK]	178.34	0.2386	2	4	4	9	306	32.6	5.12	0.00899441	0.917816
F1NF15	Uncharacterized protein OS=Gallus gallus GN=DYNLRB1 PE=4 SV=2 - [F1NF15_CHICK]	68.26	0.2917	2	2	2	3	96	10.9	7.25	0.058013	0.676605
F1NSP7	26S protease regulatory subunit 4 (Fragment) OS=Gallus gallus GN=PSMC1 PE=2 SV=2 - [F1NSP7_CHICK]	219.88	0.2583	3	7	8	15	422	47.5	6.11	0.00555516	0.844779
E5DEC6	NADH-ubiquinone oxidoreductase chain 5 OS=Gallus gallus GN=ND5 PE=3 SV=1 - [E5DEC6_CHICK]	59.53	0.0397	11	2	2	4	605	66.3	9.14	0.0321193	0.789489
Q5F3C3	Uncharacterized protein OS=Gallus gallus GN=RCJMB04_21o24 PE=2 SV=1 - [Q5F3C3_CHICK]	47.44	0.0789	4	2	2	3	304	34.4	6.87	-0.0900814	0.1789
Q5ZIL3	Uncharacterized protein OS=Gallus gallus GN=RCJMB04_25e17 PE=2 SV=1 - [Q5ZIL3_CHICK]	121.94	0.295	2	4	4	8	200	22.4	5.44	0.0893407	0.16242
F1NGY4	Uncharacterized protein (Fragment) OS=Gallus gallus GN=HSD3B7 PE=3 SV=2 - [F1NGY4_CHICK]	29.76	0.0325	1	1	1	1	369	41.8	8.51	-0.174588	0.472165
Q5ZJA5	Uncharacterized protein OS=Gallus gallus GN=Gga.31975 PE=2 SV=1 - [Q5ZJA5_CHICK]	258.86	0.3566	1	6	6	12	258	28.1	8.54	-0.00532599	0.931053
F1NHH1	Uncharacterized protein OS=Gallus gallus GN=CSTB PE=4 SV=2 - [F1NHH1_CHICK]	114.96	0.5816	1	4	4	7	98	11.2	6.68	0.263847	0.134082
F1NZC0	Aldose 1-epimerase OS=Gallus gallus GN=GALM PE=3 SV=2 - [F1NZC0_CHICK]	290.47	0.3198	1	7	7	31	344	38	6.89	0.0479372	0.572613
F1NU71	Mitochondrial import inner membrane translocase subunit TIM44 OS=Gallus gallus GN=TIMM44 PE=3 SV=2 - [F1NU71_CHICK]	157	0.1596	1	6	6	12	451	51.2	8.12	-0.0718685	0.357322
F1NNL9	Uncharacterized protein OS=Gallus gallus GN=TSR1 PE=4 SV=2 - [F1NNL9_CHICK]	107.95	0.1206	2	4	4	5	373	42.7	8.41	-0.0225997	0.675663
R4GF59	Uncharacterized protein OS=Gallus gallus GN=Gga.22975 PE=4 SV=1 - [R4GF59_CHICK]	167.84	0.0488	1	6	6	7	1433	164.1	6.58	-0.0525821	0.625744
F1NKZ6	Uncharacterized protein (Fragment) OS=Gallus gallus GN=EIF1AY PE=2 SV=2 - [F1NKZ6_CHICK]	98.69	0.2878	2	3	3	3	139	15.8	5.03	0.0299852	0.844205
Q5ZLF6	Uncharacterized protein OS=Gallus gallus GN=RCJMB04_6g23 PE=2 SV=1 - [Q5ZLF6_CHICK]	120.76	0.242	3	4	4	7	219	24.8	5.64	-0.0571143	0.164104
F1NRW3	Apoptosis inhibitor 5 (Fragment) OS=Gallus gallus GN=API5 PE=2 SV=2 - [F1NRW3_CHICK]	68.52	0.0625	2	3	3	5	512	57.2	7.69	-0.0117511	0.718148
A4GTP0	Galectin OS=Gallus gallus PE=2 SV=1 - [A4GTP0_CHICK]	95.01	0.1369	3	4	4	9	241	25.7	8.27	0.239228	0.23951
F1P4U5	Uncharacterized protein (Fragment) OS=Gallus gallus GN=TXNRD2 PE=3 SV=2 - [F1P4U5_CHICK]	181.95	0.1429	1	5	5	11	525	57	8.19	0.044142	0.657861
F1NZ49	Yorkie homolog (Fragment) OS=Gallus gallus GN=YAP1 PE=4 SV=2 - [F1NZ49_CHICK]	37.38	0.0463	2	1	1	1	389	42.2	5.22	#NUM!	#NUM!
F1NQI0	Uncharacterized protein OS=Gallus gallus GN=AGA PE=4 SV=1 - [F1NQI0_CHICK]	73.73	0.0725	2	2	2	3	345	36.6	6.52	0.298142	0.0549156
F1NE32	Uncharacterized protein OS=Gallus gallus GN=MOSPD1 PE=4 SV=2 - [F1NE32_CHICK]	44.01	0.0509	1	1	1	1	216	24.4	7.77	-0.0149967	0.89012
F1N8F0	Uncharacterized protein OS=Gallus gallus GN=SCD PE=2 SV=1 - [F1N8F0_CHICK]	38.51	0.056	2	2	2	2	357	40.8	8.5	0.0689244	0.776472
Q5ZJV3	Uncharacterized protein OS=Gallus gallus GN=DNAJA1 PE=2 SV=1 - [Q5ZJV3_CHICK]	81.51	0.1285	1	3	3	5	397	44.7	7.28	-0.0333692	0.769673
F1NWX7	Uncharacterized protein OS=Gallus gallus GN=SEC61B PE=4 SV=2 - [F1NWX7_CHICK]	35.25	0.1042	1	1	1	3	96	10	11.56	-0.0480327	0.722513
F1NMK5	Uncharacterized protein OS=Gallus gallus GN=KIAA0100 PE=4 SV=2 - [F1NMK5_CHICK]	40.87	0.0053	1	1	1	1	2246	254.2	7.34	-0.143789	0.316196
E1BYT2	Uncharacterized protein (Fragment) OS=Gallus gallus GN=VPS4A PE=4 SV=2 - [E1BYT2_CHICK]	91.73	0.089	1	1	3	4	438	49.2	8.29	0.0367154	0.786269
Q5ZIQ2	Uncharacterized protein OS=Gallus gallus GN=RCJMB04_24f7 PE=2 SV=1 - [Q5ZIQ2_CHICK]	92.48	0.1144	2	1	3	5	341	38.1	7.43	-0.20241	0.147636
H9KYU8	Uncharacterized protein OS=Gallus gallus PE=4 SV=2 - [H9KYU8_CHICK]	171.73	0.2865	1	4	4	13	192	21.4	9.1	0.0225407	0.847784
F2Z4M3	40S ribosomal protein S15 (Fragment) OS=Gallus gallus GN=RPS15 PE=2 SV=1 - [F2Z4M3_CHICK]	140.92	0.4167	2	4	4	12	144	16.9	10.39	-0.13847	0.783145
E1C8G8	Uncharacterized protein OS=Gallus gallus GN=PRPF39 PE=4 SV=2 - [E1C8G8_CHICK]	28.81	0.0173	1	1	1	1	695	81	5.05	-0.181301	0.232255
E1BW84	Uncharacterized protein (Fragment) OS=Gallus gallus GN=FAM120A PE=4 SV=2 - [E1BW84_CHICK]	195.8	0.0817	1	7	7	12	1114	122.5	8.87	0.0143917	0.759777
R4GLN0	Uncharacterized protein OS=Gallus gallus GN=CCDC124 PE=4 SV=1 - [R4GLN0_CHICK]	41.89	0.0588	1	1	1	1	221	25.9	9.45	-0.0625924	0.752113
E1BRV3	Uncharacterized protein OS=Gallus gallus PE=4 SV=2 - [E1BRV3_CHICK]	62.78	0.0324	1	2	2	3	709	78.1	6.84	-0.101996	0.396485
Q5ZMF7	Uncharacterized protein OS=Gallus gallus GN=RCJMB04_2d1 PE=2 SV=1 - [Q5ZMF7_CHICK]	58.6	0.0352	2	2	2	7	483	52.5	6.6	0.0747989	0.295088
F1P442	NEDD8-activating enzyme E1 regulatory subunit OS=Gallus gallus GN=NAE1 PE=4 SV=2 - [F1P442_CHICK]	31.77	0.0318	2	1	1	1	535	60.4	5.58	#NUM!	#NUM!
E1BTI0	Uncharacterized protein OS=Gallus gallus GN=GPAM PE=4 SV=1 - [E1BTI0_CHICK]	151.36	0.0857	1	5	5	7	828	94.1	8.13	-0.0563887	0.365788
F1NU18	Uncharacterized protein OS=Gallus gallus GN=PNPT1 PE=4 SV=2 - [F1NU18_CHICK]	69.5	0.04	1	2	2	2	800	86.9	8.15	-0.0701301	0.443033
Q5ZM56	Uncharacterized protein OS=Gallus gallus GN=LOC100859123 PE=2 SV=1 - [Q5ZM56_CHICK]	132.56	0.1433	1	4	4	6	321	36.7	6.44	0.0527491	0.341941
E1BSR5	Uncharacterized protein OS=Gallus gallus GN=RBM25 PE=4 SV=2 - [E1BSR5_CHICK]	24.36	0.0122	1	1	1	2	817	96.8	6.02	-0.179221	0.0486288
Q2I811	NK-lysin OS=Gallus gallus GN=LOC693257 PE=2 SV=1 - [Q2I811_CHICK]	117.27	0.2286	1	4	4	5	140	15.2	6.32	-0.0570037	0.881618
E1BZA7	Uncharacterized protein (Fragment) OS=Gallus gallus GN=CCDC72 PE=4 SV=2 - [E1BZA7_CHICK]	39.7	0.1266	1	1	1	2	79	8.7	10.49	-0.00279874	0.988376
E1C5M5	Uncharacterized protein OS=Gallus gallus GN=THNSL1 PE=3 SV=2 - [E1C5M5_CHICK]	82.44	0.0586	2	3	3	3	734	81.8	7.37	-0.0232735	0.681036
F1NJB4	Uncharacterized protein OS=Gallus gallus GN=KDSR PE=2 SV=1 - [F1NJB4_CHICK]	32.03	0.0482	1	1	1	1	332	36.3	6.99	#NUM!	#NUM!
E1BT08	Uncharacterized protein OS=Gallus gallus GN=HSPH1 PE=3 SV=2 - [E1BT08_CHICK]	87.19	0.0361	1	1	3	6	997	111.2	6.1	-0.167274	0.0458943
E1C6A8	Uncharacterized protein OS=Gallus gallus GN=PRPF38A PE=4 SV=1 - [E1C6A8_CHICK]	36.74	0.0385	1	1	1	4	312	37.4	9.88	-0.163301	0.0633174
R4GHS4	Uncharacterized protein OS=Gallus gallus PE=4 SV=1 - [R4GHS4_CHICK]	58.79	0.0979	1	2	2	3	235	25	9.82	-0.0771107	0.202514
F1NSA0	Uncharacterized protein OS=Gallus gallus GN=PLEK PE=4 SV=1 - [F1NSA0_CHICK]	72.84	0.1331	2	3	3	3	353	40.3	8.48	-0.0527166	0.51541
F1NQH4	Uncharacterized protein OS=Gallus gallus GN=PRPF40A PE=4 SV=2 - [F1NQH4_CHICK]	85.93	0.0507	4	3	3	4	750	84.7	5.53	-0.169323	0.222196
E1C050	Eukaryotic translation initiation factor 3 subunit F OS=Gallus gallus GN=EIF3F PE=3 SV=1 - [E1C050_CHICK]	217.03	0.1898	1	4	4	6	332	35.2	5.58	0.0738027	0.195778
F1NNQ3	Vacuolar protein sorting-associated protein 29 (Fragment) OS=Gallus gallus GN=VPS29 PE=2 SV=1 - [F1NNQ3_CHICK]	229.88	0.3913	2	3	5	14	184	20.7	7.05	-0.0071666	0.937631
E1C8L9	Uncharacterized protein OS=Gallus gallus GN=LOC416931 PE=4 SV=2 - [E1C8L9_CHICK]	166.78	0.1492	1	1	3	9	181	20.2	6.79	0.0645438	0.688582
R4GJ10	Uncharacterized protein (Fragment) OS=Gallus gallus GN=CSAD PE=3 SV=1 - [R4GJ10_CHICK]	83.28	0.0533	1	3	3	6	488	54.8	6.93	0.0249332	0.819704
F1N9S3	Uncharacterized protein OS=Gallus gallus GN=FAM98A PE=2 SV=1 - [F1N9S3_CHICK]	28.45	0.0272	2	1	1	2	551	58.6	9.01	0.0674535	0.301978
F1P579	Uncharacterized protein OS=Gallus gallus GN=CHCHD2 PE=4 SV=2 - [F1P579_CHICK]	125.38	0.2905	1	2	3	11	148	15.2	8.82	0.0636424	0.650264
F1P3V4	Uncharacterized protein (Fragment) OS=Gallus gallus GN=LRRC47 PE=4 SV=2 - [F1P3V4_CHICK]	94.01	0.0748	1	3	3	3	575	61.6	8.34	-0.0394564	0.741384
F1NG13	Uncharacterized protein (Fragment) OS=Gallus gallus GN=TGM3 PE=3 SV=2 - [F1NG13_CHICK]	31.78	0.0187	1	1	1	2	695	77.5	6.37	-0.0852818	0.536237
F1NV50	Uncharacterized protein OS=Gallus gallus GN=NBAS PE=4 SV=2 - [F1NV50_CHICK]	24.83	0.0051	1	1	1	1	2376	269.4	5.54	-0.149164	0.095529
E1BRW7	Uncharacterized protein OS=Gallus gallus GN=TTC35 PE=4 SV=1 - [E1BRW7_CHICK]	32.88	0.0404	1	1	1	1	297	34.9	6.57	-0.122928	0.731019
F1NDW5	Uncharacterized protein OS=Gallus gallus GN=NUP214 PE=4 SV=2 - [F1NDW5_CHICK]	45.62	0.014	1	2	2	2	2071	211.4	7.53	-0.0674279	0.40784
F1P0Z7	ADP-ribosylation factor-like protein 8A OS=Gallus gallus GN=ARL8A PE=3 SV=2 - [F1P0Z7_CHICK]	79.91	0.2688	1	1	4	5	186	21.5	8.43	0.025365	0.828365
F1NII6	Uncharacterized protein OS=Gallus gallus GN=NHP2L1 PE=4 SV=2 - [F1NII6_CHICK]	110	0.4063	1	3	3	7	128	14.1	8.16	0.285453	0.189446
O57580	High molecular mass nuclear antigen (Fragment) OS=Gallus gallus PE=2 SV=1 - [O57580_CHICK]	39.87	0.0261	1	2	2	3	1151	109.6	9.86	0.102857	0.288825
F1NQG6	Signal transducing adapter molecule 2 OS=Gallus gallus GN=STAM2 PE=4 SV=1 - [F1NQG6_CHICK]	35.36	0.0229	2	1	1	1	436	48.4	4.84	0.0262355	0.837435
F1NIU6	Uncharacterized protein OS=Gallus gallus GN=M6PR PE=2 SV=2 - [F1NIU6_CHICK]	54.36	0.1031	1	2	2	3	291	32.3	5.39	-0.329847	0.0362106
R4GGN5	Uncharacterized protein OS=Gallus gallus PE=4 SV=1 - [R4GGN5_CHICK]	25.24	0.0905	1	1	1	1	199	22.3	7.17	#NUM!	#NUM!
F1NAS0	Uncharacterized protein OS=Gallus gallus GN=SUGT1 PE=4 SV=2 - [F1NAS0_CHICK]	88.87	0.1346	3	3	3	8	327	37.2	5.67	0.0273027	0.725151
E1C9D0	Uncharacterized protein OS=Gallus gallus GN=DDO PE=4 SV=1 - [E1C9D0_CHICK]	29.37	0.0468	1	1	1	1	342	37.5	8.24	0.393728	0.0315414
F1NJR5	Uncharacterized protein OS=Gallus gallus GN=ANK1 PE=4 SV=2 - [F1NJR5_CHICK]	58.35	0.0134	1	2	2	3	1937	212.5	6.51	-0.0212256	0.847243
Q5ZL39	Uncharacterized protein OS=Gallus gallus GN=LOC100858156 PE=2 SV=1 - [Q5ZL39_CHICK]	255.63	0.3715	3	9	9	23	323	37	6.54	0.0213407	0.727833
F1NA45	Uncharacterized protein OS=Gallus gallus GN=C5H14orf166 PE=4 SV=1 - [F1NA45_CHICK]	110.66	0.2427	2	4	4	5	239	27.4	6.25	-0.0101629	0.935689
E1C122	Uncharacterized protein OS=Gallus gallus GN=ELMO2 PE=2 SV=2 - [E1C122_CHICK]	33.2	0.0139	2	1	1	1	720	82.8	5.96	0.203099	0.119636
Q5F406	Uncharacterized protein OS=Gallus gallus GN=RCJMB04_3o14 PE=2 SV=1 - [Q5F406_CHICK]	165.48	0.1274	2	4	6	13	518	58.4	5.16	0.0178694	0.815517
B9VVJ4	Signal transducer and activator of transcription OS=Gallus gallus GN=STAT5B PE=2 SV=1 - [B9VVJ4_CHICK]	248.11	0.0997	3	6	6	10	782	89.5	6.38	-0.0953395	0.0735389
R4GLE6	Eukaryotic translation initiation factor 1 OS=Gallus gallus GN=EIF1 PE=4 SV=1 - [R4GLE6_CHICK]	94.26	0.2256	2	2	3	9	133	14.8	7.97	0.0962334	0.116969
E1C8Z0	Dolichyl-diphosphooligosaccharide--protein glycosyltransferase subunit 2 OS=Gallus gallus GN=RPN2 PE=4 SV=2 - [E1C8Z0_CHICK]	359.72	0.2567	2	10	10	52	631	68.8	6.32	-0.0233617	0.827322
F1NXN9	Uncharacterized protein OS=Gallus gallus GN=HM13 PE=4 SV=2 - [F1NXN9_CHICK]	21.06	0.0203	1	1	1	1	492	53.1	9.14	0.229923	0.156385
F1P1U3	Uncharacterized protein OS=Gallus gallus GN=CPT2 PE=2 SV=1 - [F1P1U3_CHICK]	292.71	0.375	2	8	8	24	256	29.9	9.35	0.0899118	0.209256
E1BVQ3	Uncharacterized protein OS=Gallus gallus GN=ARFGEF2 PE=4 SV=2 - [E1BVQ3_CHICK]	125.04	0.0265	2	4	4	6	1774	200	6.57	-0.0712928	0.346122
E1BT09	Uncharacterized protein OS=Gallus gallus GN=RAB3GAP1 PE=4 SV=2 - [E1BT09_CHICK]	21.44	0.0128	1	1	1	1	1014	113.5	5.82	-0.144696	0.0589636
E1C6U2	Uncharacterized protein OS=Gallus gallus GN=C7 PE=4 SV=2 - [E1C6U2_CHICK]	64.62	0.06	2	3	3	5	834	93	6.25	-0.150085	0.0226503
E1BVX9	Signal recognition particle subunit SRP72 OS=Gallus gallus GN=SRP72 PE=3 SV=1 - [E1BVX9_CHICK]	105	0.076	2	4	4	4	671	74.4	9.2	-0.0468558	0.0449465
D5LPR1	Fascin OS=Gallus gallus GN=FSCN1 PE=2 SV=1 - [D5LPR1_CHICK]	119.58	0.1531	1	5	5	8	490	54.1	7.2	0.0464848	0.296568
R4GLY3	Uncharacterized protein OS=Gallus gallus GN=LOC100858664 PE=4 SV=1 - [R4GLY3_CHICK]	93.78	0.1463	3	2	2	2	205	22.6	6.39	0.0524779	0.862013
F1NJK4	Uncharacterized protein OS=Gallus gallus GN=SERHL2 PE=4 SV=2 - [F1NJK4_CHICK]	46.18	0.0792	1	2	2	2	303	34.1	8.81	-0.00739277	0.883674
Q5ZIJ6	Uncharacterized protein OS=Gallus gallus GN=RCJMB04_25k20 PE=2 SV=1 - [Q5ZIJ6_CHICK]	50.46	0.049	2	2	2	4	612	69.1	6.71	-0.00788801	0.914095
F1NMF6	Procollagen-lysine,2-oxoglutarate 5-dioxygenase 1 OS=Gallus gallus GN=PLOD1 PE=4 SV=1 - [F1NMF6_CHICK]	38.28	0.0329	2	2	2	2	730	84.3	6.74	-0.0612122	0.213014
E1C2K6	Uncharacterized protein OS=Gallus gallus PE=4 SV=2 - [E1C2K6_CHICK]	72.35	0.0192	1	2	2	2	1566	172.7	5.15	-0.137296	0.14469
E1C3U6	Uncharacterized protein OS=Gallus gallus GN=COPS2 PE=4 SV=2 - [E1C3U6_CHICK]	121.3	0.1084	2	3	3	5	443	51.5	5.6	-0.0833624	0.295136
H9KZD5	Uncharacterized protein (Fragment) OS=Gallus gallus GN=LARP4 PE=4 SV=2 - [H9KZD5_CHICK]	90.69	0.0333	2	2	2	3	750	81.3	6.89	-0.0477389	0.771239
Q5ZLT2	Uncharacterized protein OS=Gallus gallus GN=PDK3 PE=2 SV=1 - [Q5ZLT2_CHICK]	187.83	0.1921	1	4	5	11	406	46.6	7.83	0.0245209	0.819547
F1NIR8	Uncharacterized protein (Fragment) OS=Gallus gallus GN=SCRN3 PE=4 SV=2 - [F1NIR8_CHICK]	141.59	0.1354	1	4	4	12	421	47	5.76	0.0942692	0.371339
E1BSC0	Uncharacterized protein OS=Gallus gallus GN=DDX46 PE=4 SV=2 - [E1BSC0_CHICK]	26.82	0.0125	1	1	1	2	1043	119.1	9.26	-0.196025	0.237862
F1NK12	Queuine tRNA-ribosyltransferase subunit QTRTD1 (Fragment) OS=Gallus gallus GN=QTRTD1 PE=3 SV=2 - [F1NK12_CHICK]	99.03	0.1347	2	4	4	4	401	44.8	5.38	-0.104236	0.0485985
F1NGT3	Uncharacterized protein (Fragment) OS=Gallus gallus GN=MMP9 PE=4 SV=2 - [F1NGT3_CHICK]	21.11	0.0204	2	1	1	1	686	76.6	5.2	-0.139578	0.404458
Q5ZL48	Uncharacterized protein OS=Gallus gallus GN=RCJMB04_7n10 PE=2 SV=1 - [Q5ZL48_CHICK]	33.15	0.0403	2	2	2	2	472	51.9	9.64	0.0129506	0.930504
F1NRJ7	Uncharacterized protein OS=Gallus gallus GN=LOC100858990 PE=4 SV=2 - [F1NRJ7_CHICK]	110.7	0.2227	1	5	5	11	247	27.7	5.88	-0.0109023	0.937194
F1P2J5	Uncharacterized protein OS=Gallus gallus GN=GNB1 PE=2 SV=1 - [F1P2J5_CHICK]	393.54	0.3706	4	6	9	37	340	37.3	6	-0.00529446	0.918337
F1NCQ3	Uncharacterized protein OS=Gallus gallus GN=LOC428278 PE=4 SV=2 - [F1NCQ3_CHICK]	25.35	0.0286	1	1	1	1	350	39.7	5.4	0.0459075	0.747623
Q5ZMV0	Uncharacterized protein OS=Gallus gallus GN=HCLS1 PE=2 SV=1 - [Q5ZMV0_CHICK]	25.18	0.0272	1	1	1	1	515	57.2	4.86	0.112138	0.634294
F1NH54	Uncharacterized protein OS=Gallus gallus GN=STRN3 PE=4 SV=2 - [F1NH54_CHICK]	68.54	0.016	1	1	1	2	812	88.8	5.3	-0.0311994	0.659677
R4GHI6	Uncharacterized protein OS=Gallus gallus PE=4 SV=1 - [R4GHI6_CHICK]	152.18	0.3268	1	5	5	9	205	23	7.71	0.0952731	0.187197
F1NIE3	Uncharacterized protein (Fragment) OS=Gallus gallus GN=ITIH3 PE=4 SV=2 - [F1NIE3_CHICK]	145.82	0.0683	1	5	5	7	893	100.5	6.15	-0.1613	0.109063
R4GFS0	Uncharacterized protein OS=Gallus gallus GN=LOC100858240 PE=4 SV=1 - [R4GFS0_CHICK]	90.45	0.0631	1	1	1	5	206	23	9.19	0.176597	0.226651
F1P4I9	Proteasomal ubiquitin receptor ADRM1 OS=Gallus gallus GN=ADRM1 PE=2 SV=1 - [F1P4I9_CHICK]	67	0.0691	2	2	2	2	405	42.2	5.15	0.293193	0.0298931
E1C0X6	Uncharacterized protein OS=Gallus gallus GN=IYD PE=4 SV=1 - [E1C0X6_CHICK]	35.96	0.0653	1	2	2	2	291	33.6	7.11	0.0754397	0.653519
E1C262	Uncharacterized protein OS=Gallus gallus PE=4 SV=2 - [E1C262_CHICK]	104.86	0.0371	1	3	3	5	1240	140.5	7.18	-0.127129	0.133963
F1P327	Uncharacterized protein (Fragment) OS=Gallus gallus GN=LOC100858939 PE=4 SV=2 - [F1P327_CHICK]	32.4	0.0503	1	1	1	1	338	36.8	8.97	-0.0337935	0.869026
F1N9A3	Uncharacterized protein OS=Gallus gallus GN=ARL3 PE=3 SV=2 - [F1N9A3_CHICK]	24.72	0.0628	1	1	1	1	191	21.2	5.87	-0.0945067	0.591092
F2XNG5	Fowlicidin-2 OS=Gallus gallus GN=CathL2 PE=2 SV=1 - [F2XNG5_CHICK]	180.06	0.3701	3	4	4	14	154	16.9	8	0.19293	0.324397
E3VVZ8	Elongation of long chain fatty acids family member 5 OS=Gallus gallus GN=ELOVL5 PE=2 SV=1 - [E3VVZ8_CHICK]	22.6	0.0441	1	1	1	1	295	35.2	9.32	0.131777	0.423544
F1NE50	Probable glutamate--tRNA ligase, mitochondrial OS=Gallus gallus GN=EARS2 PE=3 SV=1 - [F1NE50_CHICK]	31.3	0.0259	2	1	1	2	502	56.9	6.87	-0.21117	0.0726935
Q5XNV3	Cytoplasmic activation-proliferation-associated protein 1 OS=Gallus gallus GN=CAPRIN1 PE=2 SV=1 - [Q5XNV3_CHICK]	99.84	0.0427	1	3	3	8	702	77.9	5.16	0.0817851	0.492683
E1C8Z5	Uncharacterized protein OS=Gallus gallus GN=SH3BGRL3 PE=4 SV=1 - [E1C8Z5_CHICK]	40.28	0.1398	1	1	1	3	93	10.5	5.17	-0.0998606	0.633622
E1C230	Uncharacterized protein (Fragment) OS=Gallus gallus GN=VPS24 PE=4 SV=2 - [E1C230_CHICK]	31.57	0.0548	1	1	1	1	219	24.6	5.26	-0.0944998	0.143885
F1P4B8	Uncharacterized protein (Fragment) OS=Gallus gallus GN=SNRPF PE=4 SV=2 - [F1P4B8_CHICK]	36.97	0.1161	1	1	1	5	112	12.4	7.14	0.302942	0.0681555
F1P4R1	Uncharacterized protein OS=Gallus gallus GN=EPHX1 PE=4 SV=2 - [F1P4R1_CHICK]	124.88	0.1099	1	3	3	6	464	53.2	7.43	0.0692125	0.467274
F1NB38	Ethylmalonyl-CoA decarboxylase OS=Gallus gallus GN=ECHDC1 PE=3 SV=2 - [ECHD1_CHICK]	161.15	0.2416	2	5	5	8	298	32.5	9.1	0.0566136	0.131366
E1C3S1	Uncharacterized protein OS=Gallus gallus GN=SLC16A2 PE=4 SV=2 - [E1C3S1_CHICK]	81.48	0.0747	1	2	2	3	509	55.1	8.4	-0.066069	0.770883
Q6IEC5	Putative ISG12(2) protein OS=Gallus gallus GN=ISG12(2) PE=4 SV=1 - [Q6IEC5_CHICK]	225.11	0.6262	1	4	4	16	107	10.3	10.17	-0.681712	0.341931
E1BYP1	Uncharacterized protein OS=Gallus gallus GN=KIF13B PE=3 SV=2 - [E1BYP1_CHICK]	38.69	0.0097	1	1	1	1	1950	216.2	5.78	-0.165668	0.470296
E1C5L8	Uncharacterized protein OS=Gallus gallus GN=MRPL44 PE=4 SV=1 - [E1C5L8_CHICK]	71.36	0.1074	1	2	2	2	326	36	9.54	-0.0748289	0.635969
E1BVQ1	Uncharacterized protein OS=Gallus gallus GN=HIP1R PE=4 SV=2 - [E1BVQ1_CHICK]	93.41	0.0471	1	1	3	6	976	110.1	5.96	0.0943635	0.532695
Q5ZJZ1	Uncharacterized protein OS=Gallus gallus GN=RCJMB04_14f2 PE=2 SV=1 - [Q5ZJZ1_CHICK]	63.94	0.042	1	1	3	6	976	110.1	6.01	0.0149345	0.923477
Q5ZI34	Redox-regulatory protein FAM213A OS=Gallus gallus GN=FAM213A PE=2 SV=2 - [F213A_CHICK]	123.26	0.2009	2	3	3	7	224	24.9	8.82	0.0873506	0.720833
E1C3B2	Cytochrome c oxidase subunit 6A, mitochondrial OS=Gallus gallus GN=COX6A1 PE=3 SV=1 - [E1C3B2_CHICK]	133.51	0.5833	1	4	4	22	108	11.8	9.35	-0.00887084	0.936971
F1NER5	Uncharacterized protein OS=Gallus gallus GN=CHID1 PE=3 SV=2 - [F1NER5_CHICK]	28.14	0.028	1	1	1	1	393	45	8.24	-0.0999851	0.0560332
D2D3P4	Rab27a OS=Gallus gallus GN=Rab27a PE=2 SV=1 - [D2D3P4_CHICK]	44.68	0.0498	1	1	1	2	221	25.1	5.36	-0.210565	0.110218
F1NGI2	Uncharacterized protein (Fragment) OS=Gallus gallus GN=GIMAP1 PE=4 SV=2 - [F1NGI2_CHICK]	36.99	0.038	1	1	1	2	263	29.6	7.47	-0.138375	0.682162
E1BQR7	Uncharacterized protein OS=Gallus gallus GN=ERC1 PE=4 SV=2 - [E1BQR7_CHICK]	32.28	0.009	1	1	1	1	1117	128.3	6.02	-0.00215341	0.965354
E1BSA7	Uncharacterized protein OS=Gallus gallus GN=SEC24A PE=4 SV=2 - [E1BSA7_CHICK]	384.64	0.1482	4	11	11	26	1100	120	7.94	-0.0518781	0.460638
F1NX60	Fibulin-1 OS=Gallus gallus GN=FBLN1 PE=4 SV=1 - [F1NX60_CHICK]	75.09	0.0412	2	2	2	2	704	78.1	5.08	0.0802082	0.763353
F1NUG2	Uncharacterized protein OS=Gallus gallus GN=CYP20A1 PE=4 SV=2 - [F1NUG2_CHICK]	53.72	0.0475	1	2	2	3	463	52.4	6.99	-0.163513	0.271538
B4X9P4	Microsomal glutathione S-transferase 1 OS=Gallus gallus GN=MGST1 PE=2 SV=1 - [B4X9P4_CHICK]	152.21	0.2645	3	4	4	19	155	17.2	9.66	0.0778394	0.212972
Q5ZHV6	GrpE protein homolog OS=Gallus gallus GN=GRPEL1 PE=2 SV=1 - [Q5ZHV6_CHICK]	141.14	0.1982	1	3	3	9	222	24.8	7.49	0.0841115	0.670519
F1P277	Uncharacterized protein OS=Gallus gallus GN=LDHD PE=4 SV=2 - [F1P277_CHICK]	366.57	0.3385	1	8	8	17	452	47.9	6.79	-0.0117418	0.869832
F1NDD1	Uncharacterized protein (Fragment) OS=Gallus gallus GN=SFXN2 PE=4 SV=2 - [F1NDD1_CHICK]	49.62	0.0706	1	2	2	2	326	36	9.26	-0.352346	0.0102355
E1C4I9	Uncharacterized protein OS=Gallus gallus GN=SLC25A21 PE=3 SV=2 - [E1C4I9_CHICK]	30.7	0.0408	1	1	1	2	294	32.3	9.69	0.100415	0.1875
[truncated: 454 more rows]
